# Supplementary material
Source: PubMed Central journal article supplement (PMC3536108)
Supplement: AEM.02155-12_zam999103963so1.pdf [file AEM.02155-12_zam999103963so1.pdf]

## **Supplemental Tables and Figures**

**Supplemental Table S1.** OTU table showing the raw abundance for each OTU (97% identity) in 16S rDNA and rRNA libraries from 25 m and 100 m and the clade identification from RDP Classifier.

**Supplemental Table S2.** Best BLAST hit for each OTU when compared with the genomic reference sequence database and the associated e value.

**Supplemental Figure S1.** Rarefaction curves for 16S rDNA and rRNA libraries from station ALOHA at 25 m and 100 m depth. OTUs were defined at 97% identity to minimize sequencing errors.

**Supplemental Figure S2.** Shared and unique OTUs (97% identity) for 16S rDNA and rRNA libraries from station ALOHA at 25 m and 100 m depth.

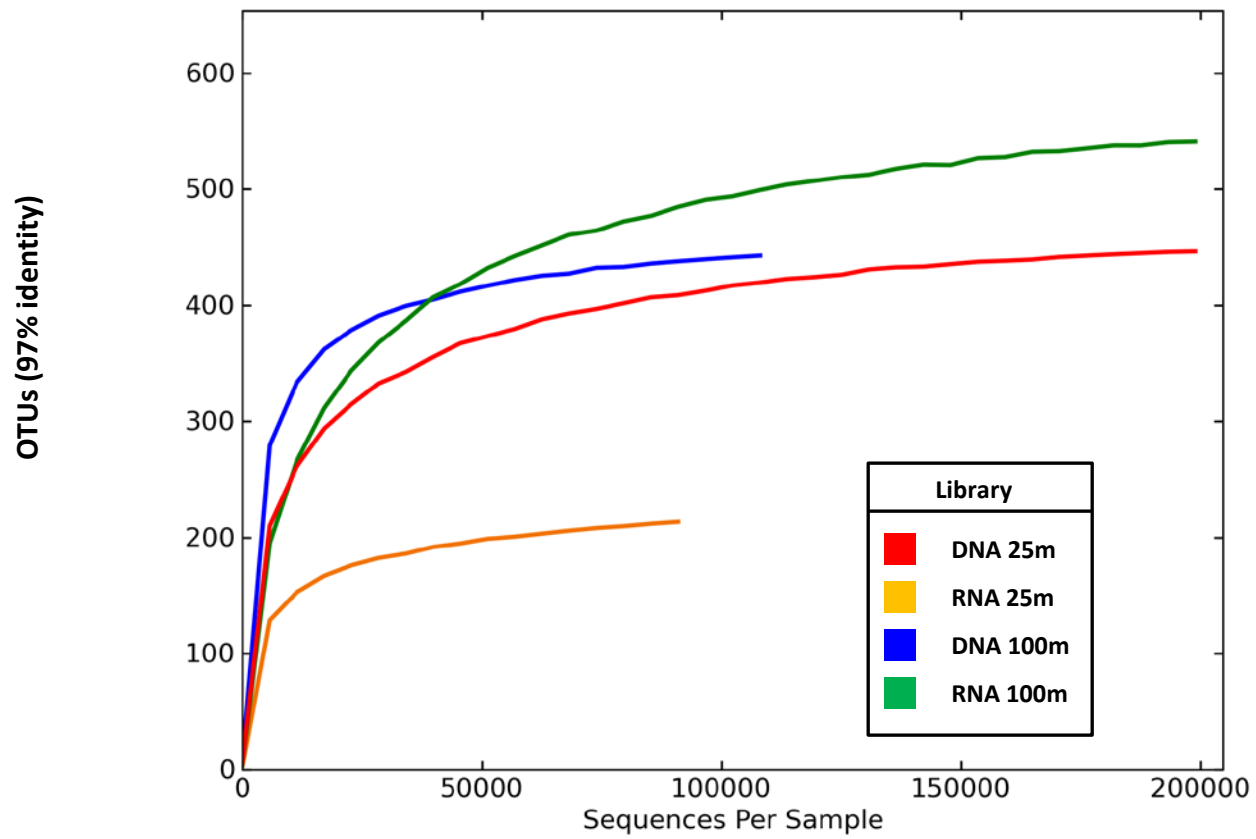

Supplemental Figure S1

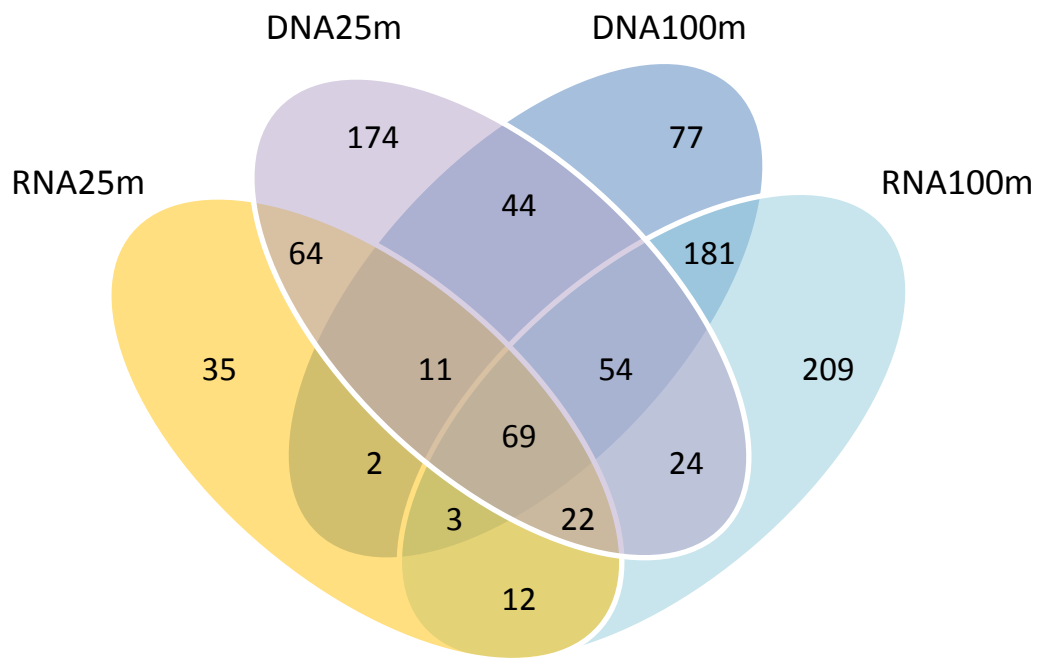

Supplemental Figure S2

Supplemental Table S1

| #OTU ID | DNA25 | RNA25 | DNA100 | RNA100 | Consensus Lineage                                                                             |
|---------|-------|-------|--------|--------|-----------------------------------------------------------------------------------------------|
| 1       | 0     | 0     | 0      | 7      | Root;Bacteria                                                                                 |
| 2       | 1     | 0     | 10     | 20     | Root;Bacteria;Proteobacteria                                                                  |
| 5       | 29    | 12    | 0      | 0      | Root;Bacteria;Proteobacteria;Alphaproteobacteria                                              |
| 11      | 160   | 0     | 0      | 0      | Root;Bacteria;Cyanobacteria;Cyanobacteria;Family II;GpIIa                                     |
| 12      | 0     | 0     | 0      | 157    | Root;Bacteria;Cyanobacteria;Cyanobacteria;Family II;GpIIa                                     |
| 14      | 8     | 3     | 1      | 42     | Root;Bacteria;Proteobacteria                                                                  |
| 16      | 0     | 0     | 0      | 9      | Root;Bacteria                                                                                 |
| 23      | 43    | 0     | 0      | 0      | Root;Bacteria;Proteobacteria;Alphaproteobacteria                                              |
| 29      | 0     | 0     | 0      | 14     | Root;Bacteria;Proteobacteria                                                                  |
| 35      | 0     | 0     | 18     | 30     | Root;Bacteria                                                                                 |
| 37      | 63    | 2     | 9      | 0      | Root;Bacteria;Proteobacteria                                                                  |
| 38      | 30    | 0     | 0      | 19     | Root;Bacteria                                                                                 |
| 40      | 0     | 0     | 0      | 7      | Root;Bacteria                                                                                 |
| 44      | 215   | 18    | 20     | 31     | Root;Bacteria                                                                                 |
| 48      | 0     | 0     | 21     | 4      | Root;Bacteria                                                                                 |
| 49      | 170   | 0     | 356    | 9      | Root;Bacteria;Proteobacteria;Alphaproteobacteria                                              |
| 52      | 0     | 0     | 0      | 21     | Root;Bacteria;Proteobacteria;Alphaproteobacteria                                              |
| 53      | 8     | 0     | 0      | 0      | Root;Bacteria;Proteobacteria;Alphaproteobacteria                                              |
| 54      | 0     | 0     | 3      | 4      | Root;Bacteria                                                                                 |
| 55      | 0     | 0     | 16     | 1      | Root;Bacteria;Verrucomicrobia;Verrucomicrobiae;Verrucomicrobiales;Opitutaceae;Opitutus        |
| 61      | 126   | 53    | 0      | 15     | Root;Bacteria;Proteobacteria;Gammaproteobacteria;Alteromonadales;Alteromonadaceae             |
| 62      | 0     | 0     | 88     | 113    | Root;Bacteria;Proteobacteria;Gammaproteobacteria                                              |
| 64      | 0     | 0     | 30     | 6      | Root;Bacteria;Proteobacteria;Gammaproteobacteria                                              |
| 65      | 2     | 0     | 0      | 12     | Root;Bacteria                                                                                 |
| 67      | 0     | 0     | 0      | 11     | Root;Bacteria;Cyanobacteria;Cyanobacteria;Family II;GpIIa                                     |
| 68      | 2     | 0     | 0      | 0      | Root;Bacteria;Bacteroidetes;Sphingobacteria;Sphingobacteriales                                |
| 69      | 0     | 0     | 21     | 0      | Root;Bacteria;Proteobacteria                                                                  |
| 72      | 0     | 12    | 0      | 0      | Root;Bacteria;Cyanobacteria;Cyanobacteria;Family II;GpIIa                                     |
| 73      | 16    | 0     | 0      | 0      | Root;Bacteria;Cyanobacteria;Cyanobacteria;Family II;GpIIa                                     |
| 74      | 0     | 0     | 0      | 14     | Root;Bacteria;Proteobacteria;Alphaproteobacteria                                              |
| 84      | 0     | 0     | 21     | 48     | Root;Bacteria;Proteobacteria;Gammaproteobacteria                                              |
| 91      | 11    | 2     | 11     | 22     | Root;Bacteria;Proteobacteria                                                                  |
| 92      | 16    | 0     | 0      | 0      | Root;Bacteria;Proteobacteria;Alphaproteobacteria                                              |
| 95      | 0     | 0     | 17     | 4      | Root;Bacteria;Proteobacteria                                                                  |
| 100     | 0     | 0     | 0      | 3      | Root;Bacteria                                                                                 |
| 101     | 3     | 13    | 0      | 0      | Root;Bacteria;Bacteroidetes;Flavobacteria;Flavobacteriales;Flavobacteriaceae;Tenacibaculum    |
| 114     | 9     | 0     | 0      | 0      | Root;Bacteria;Proteobacteria;Deltaproteobacteria;Bdellovibrionales;Bacteriovoraceae           |
| 115     | 101   | 37    | 0      | 0      | Root;Bacteria;Proteobacteria;Alphaproteobacteria                                              |
| 117     | 0     | 0     | 0      | 22     | Root;Bacteria                                                                                 |
| 120     | 383   | 117   | 14     | 12     | Root;Bacteria;Proteobacteria;Gammaproteobacteria;Oceanospirillales;Alcanivoraceae;Alcanivorax |
| 124     | 0     | 8     | 0      | 0      | Root;Bacteria;Proteobacteria                                                                  |
| 127     | 0     | 0     | 7      | 1      | Root;Bacteria;Proteobacteria;Alphaproteobacteria;Rickettsiales;Incertae sedis 4;Caedibacter   |
| 130     | 12    | 0     | 0      | 0      | Root;Bacteria;Proteobacteria;Alphaproteobacteria                                              |
| 133     | 0     | 0     | 23     | 1      | Root;Bacteria                                                                                 |
| 135     | 0     | 0     | 0      | 2      | Root;Bacteria;Cyanobacteria;Cyanobacteria;Family II;GpIIa                                     |
| 139     | 21    | 0     | 0      | 58     | Root;Bacteria;Proteobacteria;Alphaproteobacteria;Rhodobacterales;Rhodobacteraceae;Loktanela   |
| 144     | 0     | 0     | 0      | 2      | Root;Bacteria;Proteobacteria                                                                  |
| 150     | 1     | 0     | 2      | 1      | Root;Bacteria                                                                                 |
| 154     | 6     | 0     | 0      | 0      | Root;Bacteria;Verrucomicrobia;Verrucomicrobiae;Verrucomicrobiales;Opitutaceae;Opitutus        |
| 155     | 2     | 0     | 0      | 0      | Root;Bacteria                                                                                 |
| 162     | 115   | 0     | 83     | 16     | Root;Bacteria;Verrucomicrobia;Verrucomicrobiae;Verrucomicrobiales;Opitutaceae;Opitutus        |
| 163     | 63    | 4     | 22     | 14     | Root;Bacteria;Bacteroidetes;Flavobacteria;Flavobacteriales                                    |
| 164     | 0     | 0     | 0      | 43     | Root;Bacteria;Cyanobacteria;Cyanobacteria;Family II;GpIIa                                     |
| 168     | 0     | 0     | 0      | 4      | Root;Bacteria;Proteobacteria;Gammaproteobacteria                                              |
| 174     | 0     | 0     | 0      | 16     | Root;Bacteria;Proteobacteria;Gammaproteobacteria                                              |
| 184     | 0     | 0     | 286    | 107    | Root;Bacteria                                                                                 |
| 187     | 117   | 38    | 20     | 22     | Root;Bacteria;Proteobacteria;Alphaproteobacteria                                              |
| 199     | 0     | 0     | 0      | 10     | Root;Bacteria;Proteobacteria;Gammaproteobacteria;Oceanospirillales;Hahellaceae                |
| 207     | 0     | 0     | 0      | 31     | Root;Bacteria;Cyanobacteria;Cyanobacteria;Family II;GpIIa                                     |
| 209     | 0     | 0     | 1      | 6      | Root;Bacteria;Proteobacteria;Alphaproteobacteria                                              |
| 215     | 0     | 0     | 0      | 4      | Root;Bacteria;Bacteroidetes;Sphingobacteria;Sphingobacteriales                                |
| 217     | 36    | 16    | 27     | 115    | Root;Bacteria;Proteobacteria;Alphaproteobacteria;Rhodobacterales;Rhodobacteraceae             |
| 232     | 0     | 0     | 19     | 0      | Root;Bacteria;Proteobacteria                                                                  |
| 233     | 7     | 0     | 0      | 0      | Root;Bacteria                                                                                 |
| 237     | 31    | 0     | 143    | 0      | Root;Bacteria;Proteobacteria                                                                  |
| 240     | 0     | 0     | 0      | 3      | Root;Bacteria                                                                                 |
| 242     | 0     | 0     | 3      | 4      | Root;Bacteria                                                                                 |
| 246     | 0     | 4     | 0      | 1      | Root;Bacteria;Proteobacteria;Gammaproteobacteria;Thiotrichales;Francisellaceae;Francisella    |
| 247     | 0     | 0     | 17     | 0      | Root;Bacteria;Proteobacteria                                                                  |
| 249     | 3656  | 163   | 1539   | 451    | Root;Bacteria                                                                                 |
| 251     | 0     | 0     | 8      | 0      | Root;Bacteria;Proteobacteria                                                                  |
| 253     | 1     | 0     | 247    | 114    | Root;Bacteria                                                                                 |
| 254     | 0     | 0     | 122    | 0      | Root;Bacteria                                                                                 |
| 256     | 0     | 0     | 0      | 6      | Root;Bacteria                                                                                 |
| 257     | 6     | 0     | 0      | 0      | Root;Bacteria;Proteobacteria;Alphaproteobacteria                                              |
| 262     | 0     | 0     | 0      | 25     | Root;Bacteria                                                                                 |

| #OTU ID | DNA25 | RNA25 | DNA100 | RNA100 | Consensus Lineage                                                                                  |
|---------|-------|-------|--------|--------|----------------------------------------------------------------------------------------------------|
| 263     | 0     | 0     | 0      | 4      | Root;Bacteria                                                                                      |
| 268     | 0     | 0     | 1      | 8      | Root;Bacteria                                                                                      |
| 269     | 0     | 0     | 3      | 0      | Root;Bacteria                                                                                      |
| 270     | 0     | 0     | 17     | 49     | Root;Bacteria                                                                                      |
| 275     | 0     | 0     | 1      | 1      | Root;Bacteria;Proteobacteria;Deltaproteobacteria;Bdellovibrionales;Bacteriovoraceae; Bacteriovorax |
| 278     | 0     | 0     | 0      | 32     | Root;Bacteria                                                                                      |
| 284     | 0     | 0     | 29     | 3      | Root;Bacteria                                                                                      |
| 285     | 5     | 0     | 0      | 77     | Root;Bacteria                                                                                      |
| 287     | 75    | 33    | 0      | 0      | Root;Bacteria;Proteobacteria;Alphaproteobacteria                                                   |
| 288     | 0     | 41    | 0      | 48     | Root;Bacteria;Cyanobacteria;Cyanobacteria;Family II;GpIIa                                          |
| 289     | 0     | 0     | 2      | 1      | Root;Bacteria;Proteobacteria                                                                       |
| 291     | 0     | 0     | 59     | 21     | Root;Bacteria                                                                                      |
| 296     | 0     | 0     | 0      | 30     | Root;Bacteria;Proteobacteria;Alphaproteobacteria                                                   |
| 297     | 444   | 0     | 0      | 0      | Root;Bacteria;Proteobacteria;Alphaproteobacteria                                                   |
| 298     | 3     | 0     | 0      | 0      | Root;Bacteria                                                                                      |
| 302     | 0     | 0     | 0      | 11     | Root;Bacteria                                                                                      |
| 308     | 15    | 0     | 0      | 0      | Root;Bacteria;Proteobacteria                                                                       |
| 316     | 0     | 0     | 1      | 1      | Root;Bacteria                                                                                      |
| 317     | 57    | 110   | 0      | 0      | Root;Bacteria;Proteobacteria;Alphaproteobacteria                                                   |
| 318     | 0     | 0     | 5      | 35     | Root;Bacteria                                                                                      |
| 324     | 0     | 0     | 0      | 3      | Root;Bacteria                                                                                      |
| 325     | 0     | 0     | 0      | 2      | Root;Bacteria;Proteobacteria                                                                       |
| 326     | 0     | 0     | 22     | 24     | Root;Bacteria;Bacteroidetes;Flavobacteria;Flavobacteriales                                         |
| 327     | 14    | 0     | 31     | 0      | Root;Bacteria;Proteobacteria                                                                       |
| 328     | 0     | 0     | 0      | 39     | Root;Bacteria;Proteobacteria;Gammaproteobacteria                                                   |
| 329     | 11    | 0     | 0      | 0      | Root;Bacteria                                                                                      |
| 332     | 4     | 0     | 183    | 44     | Root;Bacteria;Actinobacteria;Actinobacteria;Actinobacteridae;Actinomycetales                       |
| 333     | 0     | 0     | 0      | 54     | Root;Bacteria                                                                                      |
| 335     | 1764  | 18    | 639    | 18     | Root;Bacteria;Proteobacteria                                                                       |
| 339     | 0     | 0     | 0      | 2      | Root;Bacteria;Proteobacteria;Gammaproteobacteria;Alteromonadales;Colwelliaceae                     |
| 340     | 0     | 0     | 0      | 2      | Root;Bacteria;Proteobacteria                                                                       |
| 341     | 0     | 0     | 0      | 2      | Root;Bacteria;Verrucomicrobia;Verrucomicrobiae;Verrucomicrobiales;Opitutaceae;Opitutus             |
| 343     | 0     | 0     | 21     | 80     | Root;Bacteria;Proteobacteria;Alphaproteobacteria                                                   |
| 347     | 347   | 0     | 0      | 0      | Root;Bacteria;Proteobacteria;Alphaproteobacteria                                                   |
| 348     | 0     | 0     | 28     | 62     | Root;Bacteria                                                                                      |
| 352     | 8     | 3     | 86     | 0      | Root;Bacteria;Proteobacteria;Alphaproteobacteria                                                   |
| 355     | 4     | 0     | 0      | 1      | Root;Bacteria;Proteobacteria                                                                       |
| 359     | 0     | 0     | 1      | 10     | Root;Bacteria;Cyanobacteria;Cyanobacteria;Family II;GpIIa                                          |
| 361     | 3     | 0     | 0      | 0      | Root;Bacteria;Proteobacteria                                                                       |
| 364     | 0     | 2     | 94     | 164    | Root;Bacteria                                                                                      |
| 365     | 6     | 0     | 0      | 0      | Root;Bacteria;Proteobacteria;Gammaproteobacteria;Alteromonadales                                   |
| 367     | 0     | 0     | 4      | 0      | Root;Bacteria                                                                                      |
| 373     | 461   | 24    | 0      | 0      | Root;Bacteria;Proteobacteria;Alphaproteobacteria;Rhizobiales                                       |
| 381     | 0     | 2     | 0      | 0      | Root;Bacteria;Proteobacteria                                                                       |
| 382     | 157   | 0     | 6      | 0      | Root;Bacteria;Proteobacteria                                                                       |
| 383     | 0     | 0     | 2      | 0      | Root;Bacteria;Cyanobacteria;Cyanobacteria;Family II;GpIIa                                          |
| 384     | 0     | 28    | 0      | 0      | Root;Bacteria;Cyanobacteria;Cyanobacteria;Family II;GpIIa                                          |
| 386     | 0     | 0     | 0      | 8      | Root;Bacteria                                                                                      |
| 388     | 35    | 27    | 0      | 3      | Root;Bacteria;Proteobacteria;Alphaproteobacteria                                                   |
| 389     | 439   | 9     | 51     | 5      | Root;Bacteria;Bacteroidetes;Flavobacteria;Flavobacteriales;Flavobacteriaceae                       |
| 390     | 0     | 0     | 394    | 325    | Root;Bacteria;Proteobacteria                                                                       |
| 391     | 0     | 0     | 16     | 0      | Root;Bacteria                                                                                      |
| 393     | 0     | 30    | 0      | 0      | Root;Bacteria;Proteobacteria;Alphaproteobacteria                                                   |
| 398     | 0     | 0     | 13     | 12     | Root;Bacteria;Cyanobacteria;Cyanobacteria;Family II;GpIIa                                          |
| 399     | 1470  | 164   | 0      | 17     | Root;Bacteria;Proteobacteria;Gammaproteobacteria                                                   |
| 400     | 0     | 0     | 119    | 204    | Root;Bacteria                                                                                      |
| 402     | 22    | 0     | 0      | 8      | Root;Bacteria;Proteobacteria;Gammaproteobacteria;Alteromonadales                                   |
| 403     | 0     | 0     | 39     | 1      | Root;Bacteria                                                                                      |
| 404     | 295   | 0     | 0      | 0      | Root;Bacteria;Proteobacteria;Gammaproteobacteria                                                   |
| 408     | 0     | 0     | 10     | 14     | Root;Bacteria                                                                                      |
| 413     | 0     | 0     | 5      | 0      | Root;Bacteria;Chlamydiae;Chlamydiae;Chlamydiales                                                   |
| 415     | 268   | 0     | 13     | 10     | Root;Bacteria;Bacteroidetes;Flavobacteria;Flavobacteriales;Flavobacteriaceae                       |
| 426     | 103   | 0     | 0      | 0      | Root;Bacteria;Verrucomicrobia;Verrucomicrobiae;Verrucomicrobiales;Opitutaceae;Opitutus             |
| 428     | 0     | 0     | 0      | 3      | Root;Bacteria;Proteobacteria;Alphaproteobacteria;Rhodobacterales;Rhodobacteraceae;Paracoccus       |
| 430     | 0     | 0     | 0      | 14     | Root;Bacteria                                                                                      |
| 432     | 0     | 0     | 0      | 69     | Root;Bacteria;Cyanobacteria;Cyanobacteria;Family II;GpIIa                                          |
| 433     | 3     | 0     | 0      | 1      | Root;Bacteria;Firmicutes;"Bacilli";Bacillales;Bacillaceae;"Bacillaceae 1";Bacillus;Bacillus d      |
| 435     | 0     | 0     | 5      | 0      | Root;Bacteria;Proteobacteria                                                                       |
| 440     | 12    | 0     | 0      | 0      | Root;Bacteria;Proteobacteria;Gammaproteobacteria                                                   |
| 441     | 0     | 0     | 0      | 5      | Root;Bacteria;Cyanobacteria;Cyanobacteria;Family II;GpIIa                                          |
| 447     | 0     | 2     | 16     | 103    | Root;Bacteria;Proteobacteria                                                                       |
| 448     | 69    | 0     | 198    | 0      | Root;Bacteria;Proteobacteria                                                                       |
| 452     | 3     | 0     | 0      | 0      | Root;Bacteria                                                                                      |
| 458     | 24    | 16    | 0      | 0      | Root;Bacteria;Proteobacteria;Gammaproteobacteria                                                   |
| 460     | 0     | 0     | 61     | 12     | Root;Bacteria;Proteobacteria;Alphaproteobacteria                                                   |
| 461     | 45    | 18    | 0      | 0      | Root;Bacteria;Proteobacteria;Alphaproteobacteria;Rhodobacterales;Rhodobacteraceae                  |
| 462     | 369   | 0     | 7      | 0      | Root;Bacteria;Proteobacteria;Alphaproteobacteria                                                   |

| #OTU ID | DNA25 | RNA25 | DNA100 | RNA100 | Consensus Lineage                                                                                |
|---------|-------|-------|--------|--------|--------------------------------------------------------------------------------------------------|
| 466     | 0     | 0     | 25     | 23     | Root;Bacteria                                                                                    |
| 470     | 10    | 0     | 0      | 0      | Root;Bacteria                                                                                    |
| 471     | 0     | 16    | 0      | 0      | Root;Bacteria                                                                                    |
| 475     | 0     | 0     | 0      | 7      | Root;Bacteria;Proteobacteria                                                                     |
| 476     | 0     | 0     | 36     | 30     | Root;Bacteria                                                                                    |
| 477     | 0     | 0     | 9      | 89     | Root;Bacteria                                                                                    |
| 479     | 0     | 0     | 4      | 0      | Root;Bacteria;Proteobacteria                                                                     |
| 480     | 3     | 1     | 0      | 0      | Root;Bacteria                                                                                    |
| 481     | 85    | 0     | 0      | 0      | Root;Bacteria;Proteobacteria                                                                     |
| 489     | 81    | 0     | 0      | 0      | Root;Bacteria                                                                                    |
| 493     | 570   | 0     | 0      | 0      | Root;Bacteria;Proteobacteria;Alphaproteobacteria;Rhodobacterales;Rhodobacteraceae                |
| 494     | 47    | 0     | 0      | 0      | Root;Bacteria;Proteobacteria                                                                     |
| 499     | 0     | 0     | 282    | 45     | Root;Bacteria;Proteobacteria                                                                     |
| 508     | 3     | 0     | 0      | 0      | Root;Bacteria;Acidobacteria;Acidobacteria;Acidobacteriales;Acidobacteriaceae;Gp6                 |
| 513     | 0     | 0     | 4      | 0      | Root;Bacteria                                                                                    |
| 514     | 0     | 0     | 35     | 16     | Root;Bacteria                                                                                    |
| 516     | 2     | 0     | 0      | 0      | Root;Bacteria;Cyanobacteria;Cyanobacteria                                                        |
| 521     | 0     | 0     | 216    | 110    | Root;Bacteria                                                                                    |
| 522     | 16    | 0     | 0      | 0      | Root;Bacteria;Cyanobacteria;Cyanobacteria;Family II;GpIIa                                        |
| 525     | 0     | 0     | 66     | 0      | Root;Bacteria;Proteobacteria                                                                     |
| 527     | 2     | 8     | 0      | 0      | Root;Bacteria;Proteobacteria;Alphaproteobacteria;Rhizobiales                                     |
| 529     | 22    | 0     | 0      | 0      | Root;Bacteria;Proteobacteria;Gammaproteobacteria                                                 |
| 532     | 39    | 0     | 0      | 2      | Root;Bacteria;Cyanobacteria;Cyanobacteria;Family II;GpIIa                                        |
| 533     | 50    | 0     | 1      | 0      | Root;Bacteria;Verrucomicrobia;Verrucomicrobiae;Verrucomicrobiales;Opitutaceae;Opitutus           |
| 534     | 10    | 0     | 0      | 0      | Root;Bacteria                                                                                    |
| 535     | 684   | 6     | 48     | 0      | Root;Bacteria;Proteobacteria;Alphaproteobacteria                                                 |
| 537     | 0     | 0     | 0      | 5      | Root;Bacteria;Proteobacteria;Gammaproteobacteria;Alteromonadales;Incertae sedis 7; Marinobacter  |
| 538     | 0     | 0     | 46     | 0      | Root;Bacteria;Proteobacteria                                                                     |
| 542     | 7     | 0     | 0      | 27     | Root;Bacteria;Cyanobacteria;Cyanobacteria;Family II;GpIIa                                        |
| 544     | 0     | 2     | 0      | 0      | Root;Bacteria;Proteobacteria;Gammaproteobacteria                                                 |
| 549     | 0     | 0     | 0      | 15     | Root;Bacteria;Proteobacteria;Alphaproteobacteria                                                 |
| 550     | 45    | 42    | 0      | 0      | Root;Bacteria;Proteobacteria;Gammaproteobacteria;Oceanospirillales                               |
| 551     | 0     | 0     | 0      | 3      | Root;Bacteria;Proteobacteria                                                                     |
| 553     | 0     | 0     | 44     | 0      | Root;Bacteria;Proteobacteria                                                                     |
| 555     | 0     | 0     | 39     | 93     | Root;Bacteria;Proteobacteria                                                                     |
| 556     | 0     | 0     | 0      | 5      | Root;Bacteria                                                                                    |
| 557     | 0     | 0     | 2      | 45     | Root;Bacteria;Proteobacteria                                                                     |
| 559     | 11    | 0     | 0      | 94     | Root;Bacteria;Cyanobacteria;Cyanobacteria;Family II;GpIIa                                        |
| 568     | 0     | 0     | 30     | 24     | Root;Bacteria;Proteobacteria;Alphaproteobacteria                                                 |
| 570     | 0     | 0     | 67     | 0      | Root;Bacteria;Proteobacteria                                                                     |
| 571     | 0     | 0     | 0      | 62     | Root;Bacteria;Cyanobacteria;Cyanobacteria;Family II;GpIIa                                        |
| 572     | 23    | 0     | 0      | 0      | Root;Bacteria;Proteobacteria;Alphaproteobacteria                                                 |
| 576     | 29    | 13    | 56     | 82     | Root;Bacteria;Proteobacteria                                                                     |
| 581     | 0     | 0     | 51     | 49     | Root;Bacteria                                                                                    |
| 582     | 40    | 43    | 0      | 102    | Root;Bacteria                                                                                    |
| 589     | 0     | 0     | 81     | 33550  | Root;Bacteria;Cyanobacteria;Cyanobacteria;Family II;GpIIa                                        |
| 592     | 16    | 0     | 0      | 0      | Root;Bacteria;Bacteroidetes;Flavobacteria;Flavobacteriales;Flavobacteriaceae                     |
| 601     | 0     | 22    | 0      | 0      | Root;Bacteria                                                                                    |
| 609     | 3     | 0     | 0      | 0      | Root;Bacteria;Lentisphaerae;Lentisphaerae                                                        |
| 611     | 0     | 0     | 38     | 146    | Root;Bacteria;Proteobacteria;Alphaproteobacteria                                                 |
| 612     | 52    | 0     | 0      | 0      | Root;Bacteria                                                                                    |
| 614     | 2     | 0     | 0      | 0      | Root;Bacteria;Proteobacteria;Alphaproteobacteria;Rhodobacterales;Rhodobacteraceae                |
| 617     | 0     | 2     | 0      | 0      | Root;Bacteria;Proteobacteria;Alphaproteobacteria                                                 |
| 621     | 2     | 0     | 0      | 0      | Root;Bacteria;Bacteroidetes;Sphingobacteria;Sphingobacteriales;Crenotrichaceae;Terrimonas        |
| 624     | 6     | 0     | 0      | 0      | Root;Bacteria;Bacteroidetes;Sphingobacteria;Sphingobacteriales;Flexibacteraceae;Microscilla      |
| 629     | 5     | 0     | 0      | 0      | Root;Bacteria;Proteobacteria;Alphaproteobacteria;Rhodobacterales;Rhodobacteraceae                |
| 635     | 96    | 81    | 39     | 1      | Root;Bacteria                                                                                    |
| 637     | 0     | 0     | 176    | 0      | Root;Bacteria;Proteobacteria                                                                     |
| 640     | 3     | 26    | 14     | 12     | Root;Bacteria;Cyanobacteria;Cyanobacteria;Family II;GpIIa                                        |
| 642     | 0     | 0     | 2      | 7      | Root;Bacteria;Proteobacteria;Gammaproteobacteria                                                 |
| 644     | 44    | 0     | 0      | 0      | Root;Bacteria;Proteobacteria;Alphaproteobacteria                                                 |
| 651     | 0     | 0     | 132    | 35     | Root;Bacteria;Proteobacteria;Gammaproteobacteria                                                 |
| 656     | 0     | 0     | 9      | 14     | Root;Bacteria;Proteobacteria;Alphaproteobacteria                                                 |
| 660     | 52    | 0     | 0      | 71     | Root;Bacteria;Cyanobacteria;Cyanobacteria;Family II;GpIIa                                        |
| 661     | 5     | 0     | 0      | 0      | Root;Bacteria;Proteobacteria;Alphaproteobacteria;Rhodobacterales;Rhodobacteraceae                |
| 668     | 37    | 69    | 0      | 0      | Root;Bacteria;Proteobacteria;Alphaproteobacteria                                                 |
| 669     | 0     | 0     | 30     | 10     | Root;Bacteria                                                                                    |
| 670     | 0     | 1     | 0      | 15     | Root;Bacteria;Proteobacteria;Betaproteobacteria                                                  |
| 671     | 82    | 109   | 0      | 6      | Root;Bacteria;Proteobacteria;Alphaproteobacteria;Sphingomonadales;Sphingomonadaceae; Sphingobium |
| 672     | 10    | 0     | 0      | 0      | Root;Bacteria;Proteobacteria;Gammaproteobacteria                                                 |
| 674     | 0     | 0     | 3      | 1      | Root;Bacteria                                                                                    |
| 677     | 0     | 0     | 0      | 22     | Root;Bacteria                                                                                    |
| 687     | 0     | 0     | 3      | 0      | Root;Bacteria                                                                                    |
| 688     | 6     | 0     | 0      | 0      | Root;Bacteria;Proteobacteria;Alphaproteobacteria                                                 |
| 694     | 5     | 0     | 10     | 43     | Root;Bacteria;Proteobacteria                                                                     |
| 697     | 0     | 0     | 0      | 2      | Root;Bacteria;Cyanobacteria;Cyanobacteria;Family II;GpIIa                                        |
| 699     | 0     | 0     | 0      | 12     | Root;Bacteria;Proteobacteria;Gammaproteobacteria;Oceanospirillales;Alcanivoraceae;Alcanivorax    |

| #OTU ID | DNA25 | RNA25 | DNA100 | RNA100 | Consensus Lineage                                                                              |
|---------|-------|-------|--------|--------|------------------------------------------------------------------------------------------------|
| 702     | 903   | 18    | 6      | 1      | Root;Bacteria;Proteobacteria;Alphaproteobacteria                                               |
| 705     | 0     | 0     | 0      | 6      | Root;Bacteria;Cyanobacteria;Cyanobacteria;Family II;GpIIa                                      |
| 706     | 0     | 0     | 0      | 4      | Root;Bacteria;Proteobacteria                                                                   |
| 708     | 0     | 0     | 4      | 26     | Root;Bacteria                                                                                  |
| 711     | 0     | 0     | 0      | 9      | Root;Bacteria;Cyanobacteria;Cyanobacteria;Family II;GpIIa                                      |
| 712     | 0     | 0     | 124    | 11     | Root;Bacteria;Proteobacteria;Alphaproteobacteria                                               |
| 715     | 5     | 0     | 0      | 0      | Root;Bacteria;Proteobacteria;Alphaproteobacteria;Rhodobacterales;Rhodobacteraceae              |
| 724     | 3     | 0     | 0      | 0      | Root;Bacteria                                                                                  |
| 725     | 0     | 0     | 0      | 323    | Root;Bacteria;Cyanobacteria;Cyanobacteria;Family II;GpIIa                                      |
| 726     | 0     | 225   | 0      | 0      | Root;Bacteria;Cyanobacteria;Cyanobacteria;Family II;GpIIa                                      |
| 727     | 0     | 0     | 18     | 0      | Root;Bacteria;Proteobacteria                                                                   |
| 729     | 13    | 0     | 0      | 0      | Root;Bacteria;Proteobacteria                                                                   |
| 730     | 42    | 12    | 0      | 5      | Root;Bacteria;Bacteroidetes;Flavobacteria;Flavobacteriales                                     |
| 731     | 14    | 0     | 0      | 0      | Root;Bacteria                                                                                  |
| 734     | 10    | 0     | 0      | 0      | Root;Bacteria;Bacteroidetes;Flavobacteria;Flavobacteriales;Cryomorpaceae                       |
| 736     | 0     | 0     | 14     | 0      | Root;Bacteria;Proteobacteria;Alphaproteobacteria                                               |
| 737     | 0     | 0     | 94     | 288    | Root;Bacteria                                                                                  |
| 738     | 19    | 0     | 0      | 0      | Root;Bacteria;Proteobacteria;Alphaproteobacteria                                               |
| 742     | 3     | 0     | 0      | 0      | Root;Bacteria;Cyanobacteria;Cyanobacteria;Family II;GpIIa                                      |
| 743     | 17    | 0     | 1      | 0      | Root;Bacteria;Proteobacteria;Gammaproteobacteria                                               |
| 744     | 0     | 0     | 0      | 7      | Root;Bacteria;Proteobacteria                                                                   |
| 750     | 0     | 0     | 63     | 6      | Root;Bacteria                                                                                  |
| 752     | 0     | 15    | 0      | 0      | Root;Bacteria;Cyanobacteria;Cyanobacteria;Family II;GpIIa                                      |
| 759     | 479   | 0     | 1763   | 33     | Root;Bacteria;Proteobacteria                                                                   |
| 763     | 23    | 0     | 2      | 11     | Root;Bacteria;Proteobacteria;Gammaproteobacteria;Legionellales;Coxiellaceae;Coxiella           |
| 766     | 0     | 0     | 0      | 3      | Root;Bacteria                                                                                  |
| 768     | 0     | 0     | 7      | 4      | Root;Bacteria;Proteobacteria;Alphaproteobacteria                                               |
| 769     | 0     | 0     | 0      | 2      | Root;Bacteria;Proteobacteria;Alphaproteobacteria;Rhodobacterales;Rhodobacteraceae;Thalassobius |
| 772     | 0     | 0     | 2      | 0      | Root;Bacteria;Proteobacteria;Alphaproteobacteria                                               |
| 774     | 297   | 49    | 0      | 0      | Root;Bacteria;Proteobacteria;Alphaproteobacteria;Rhodobacterales;Rhodobacteraceae              |
| 777     | 0     | 0     | 13     | 4      | Root;Bacteria;Proteobacteria                                                                   |
| 784     | 0     | 15    | 4      | 0      | Root;Bacteria;Proteobacteria                                                                   |
| 785     | 0     | 5     | 0      | 12     | Root;Bacteria;Cyanobacteria;Cyanobacteria;Family II;GpIIa                                      |
| 787     | 14    | 0     | 0      | 0      | Root;Bacteria;Cyanobacteria;Cyanobacteria;Family II;GpIIa                                      |
| 796     | 0     | 0     | 0      | 15     | Root;Bacteria;Cyanobacteria;Cyanobacteria;Family II;GpIIa                                      |
| 799     | 12    | 0     | 24     | 27     | Root;Bacteria;Proteobacteria;Alphaproteobacteria                                               |
| 800     | 8     | 0     | 0      | 0      | Root;Bacteria                                                                                  |
| 805     | 0     | 0     | 0      | 3      | Root;Bacteria                                                                                  |
| 806     | 0     | 0     | 0      | 4      | Root;Bacteria;Proteobacteria                                                                   |
| 808     | 0     | 0     | 1713   | 209    | Root;Bacteria;Proteobacteria                                                                   |
| 812     | 0     | 0     | 15     | 0      | Root;Bacteria                                                                                  |
| 813     | 1847  | 164   | 918    | 909    | Root;Bacteria                                                                                  |
| 815     | 54    | 15    | 0      | 0      | Root;Bacteria                                                                                  |
| 817     | 19    | 0     | 81     | 57     | Root;Bacteria;Proteobacteria                                                                   |
| 819     | 0     | 0     | 14     | 1      | Root;Bacteria;Proteobacteria;Alphaproteobacteria                                               |
| 820     | 21    | 0     | 14     | 45     | Root;Bacteria;Proteobacteria;Gammaproteobacteria                                               |
| 821     | 423   | 62    | 73     | 207    | Root;Bacteria;Bacteroidetes                                                                    |
| 822     | 0     | 0     | 0      | 10     | Root;Bacteria;Bacteroidetes;Flavobacteria;Flavobacteriales                                     |
| 823     | 0     | 0     | 12     | 98     | Root;Bacteria;Proteobacteria;Alphaproteobacteria                                               |
| 824     | 783   | 51    | 53     | 25     | Root;Bacteria                                                                                  |
| 839     | 54    | 0     | 77     | 0      | Root;Bacteria;Proteobacteria                                                                   |
| 841     | 6     | 0     | 22     | 17     | Root;Bacteria;Proteobacteria                                                                   |
| 845     | 0     | 0     | 0      | 4      | Root;Bacteria;Cyanobacteria;Cyanobacteria;Family II;GpIIa                                      |
| 846     | 0     | 0     | 44     | 59     | Root;Bacteria                                                                                  |
| 847     | 0     | 0     | 656    | 273    | Root;Bacteria                                                                                  |
| 852     | 0     | 0     | 13     | 25     | Root;Bacteria                                                                                  |
| 853     | 78    | 0     | 15     | 268    | Root;Bacteria;Proteobacteria;Gammaproteobacteria;Vibrionales;Vibrionaceae;Vibrio               |
| 854     | 0     | 0     | 26     | 28     | Root;Bacteria                                                                                  |
| 856     | 0     | 0     | 0      | 27     | Root;Bacteria                                                                                  |
| 857     | 0     | 0     | 115    | 58     | Root;Bacteria;Actinobacteria;Actinobacteria                                                    |
| 858     | 249   | 0     | 95     | 0      | Root;Bacteria;Proteobacteria                                                                   |
| 863     | 0     | 0     | 22     | 53     | Root;Bacteria                                                                                  |
| 867     | 1     | 0     | 7      | 13     | Root;Bacteria;Proteobacteria                                                                   |
| 870     | 28    | 0     | 0      | 0      | Root;Bacteria;Proteobacteria                                                                   |
| 871     | 0     | 0     | 0      | 5      | Root;Bacteria;Cyanobacteria;Cyanobacteria;Family II;GpIIa                                      |
| 876     | 8     | 0     | 0      | 7      | Root;Bacteria;Cyanobacteria;Cyanobacteria;Family II;GpIIa                                      |
| 878     | 0     | 0     | 0      | 2      | Root;Bacteria                                                                                  |
| 880     | 0     | 0     | 2      | 0      | Root;Bacteria                                                                                  |
| 882     | 0     | 0     | 0      | 6      | Root;Bacteria;Proteobacteria;Alphaproteobacteria                                               |
| 887     | 0     | 0     | 9      | 19     | Root;Bacteria;Proteobacteria                                                                   |
| 888     | 0     | 0     | 0      | 5      | Root;Bacteria                                                                                  |
| 893     | 47    | 0     | 0      | 0      | Root;Bacteria;Proteobacteria                                                                   |
| 896     | 2     | 0     | 0      | 0      | Root;Bacteria;Proteobacteria                                                                   |
| 898     | 0     | 0     | 0      | 11     | Root;Bacteria;Proteobacteria;Gammaproteobacteria                                               |
| 900     | 0     | 0     | 0      | 27     | Root;Bacteria;Proteobacteria                                                                   |
| 904     | 25    | 0     | 0      | 0      | Root;Bacteria;Proteobacteria;Alphaproteobacteria                                               |
| 906     | 2     | 0     | 0      | 0      | Root;Bacteria;Proteobacteria                                                                   |

| #OTU ID | DNA25 | RNA25 | DNA100 | RNA100 | Consensus Lineage                                                                                         |
|---------|-------|-------|--------|--------|-----------------------------------------------------------------------------------------------------------|
| 909     | 13    | 0     | 3      | 0      | Root;Bacteria;Proteobacteria                                                                              |
| 911     | 61    | 0     | 37     | 1019   | Root;Bacteria;Cyanobacteria;Cyanobacteria;Family II;GpIIa                                                 |
| 913     | 180   | 9     | 0      | 0      | Root;Bacteria;Proteobacteria;Alphaproteobacteria                                                          |
| 914     | 0     | 13    | 0      | 0      | Root;Bacteria;Proteobacteria;Gammaproteobacteria                                                          |
| 915     | 8     | 1     | 0      | 0      | Root;Bacteria;Bacteroidetes;Sphingobacteria;Sphingobacteriales;Saprospiraceae;Saprospira                  |
| 924     | 13    | 0     | 0      | 0      | Root;Bacteria;Proteobacteria;Gammaproteobacteria                                                          |
| 932     | 2     | 0     | 0      | 1      | Root;Bacteria;Bacteroidetes;Sphingobacteria;Sphingobacteriales                                            |
| 933     | 0     | 15    | 0      | 58     | Root;Bacteria;Cyanobacteria;Cyanobacteria;Family II;GpIIa                                                 |
| 934     | 394   | 107   | 0      | 0      | Root;Bacteria;Proteobacteria;Alphaproteobacteria                                                          |
| 935     | 3     | 2     | 0      | 0      | Root;Bacteria;Proteobacteria;Alphaproteobacteria                                                          |
| 937     | 0     | 0     | 31     | 131    | Root;Bacteria;Proteobacteria;Alphaproteobacteria                                                          |
| 938     | 7     | 0     | 0      | 0      | Root;Bacteria;Proteobacteria                                                                              |
| 942     | 209   | 108   | 13     | 102    | Root;Bacteria;Proteobacteria                                                                              |
| 944     | 0     | 0     | 27     | 1      | Root;Bacteria                                                                                             |
| 947     | 0     | 0     | 54     | 10     | Root;Bacteria;Proteobacteria;Alphaproteobacteria                                                          |
| 955     | 8     | 1     | 0      | 0      | Root;Bacteria;Proteobacteria;Gammaproteobacteria                                                          |
| 957     | 0     | 0     | 0      | 8      | Root;Bacteria;Proteobacteria                                                                              |
| 958     | 8122  | 0     | 33     | 0      | Root;Bacteria;Proteobacteria                                                                              |
| 960     | 0     | 8     | 0      | 0      | Root;Bacteria;Proteobacteria;Alphaproteobacteria;Rhodobacterales;Rhodobacteraceae                         |
| 965     | 0     | 0     | 1      | 6      | Root;Bacteria                                                                                             |
| 973     | 0     | 0     | 3      | 0      | Root;Bacteria                                                                                             |
| 974     | 4     | 292   | 26     | 551    | Root;Bacteria;Cyanobacteria;Cyanobacteria;Family II;GpIIa                                                 |
| 978     | 23    | 0     | 46     | 8      | Root;Bacteria;Proteobacteria;Gammaproteobacteria                                                          |
| 993     | 0     | 0     | 83     | 0      | Root;Bacteria                                                                                             |
| 994     | 0     | 0     | 0      | 4      | Root;Bacteria                                                                                             |
| 996     | 0     | 0     | 28     | 12     | Root;Bacteria                                                                                             |
| 998     | 0     | 0     | 0      | 8      | Root;Bacteria;Proteobacteria                                                                              |
| 1001    | 49    | 0     | 19     | 0      | Root;Bacteria;Proteobacteria                                                                              |
| 1003    | 65    | 131   | 9      | 68     | Root;Bacteria;Proteobacteria;Gammaproteobacteria;Alteromonadales;Pseudoalteromonadaceae;Pseudoalteromonas |
| 1006    | 0     | 0     | 15     | 237    | Root;Bacteria;Proteobacteria                                                                              |
| 1011    | 0     | 0     | 11     | 0      | Root;Bacteria;Proteobacteria                                                                              |
| 1014    | 7     | 0     | 14     | 0      | Root;Bacteria;Proteobacteria;Alphaproteobacteria                                                          |
| 1015    | 0     | 0     | 0      | 6      | Root;Bacteria;Cyanobacteria;Cyanobacteria;Family II;GpIIa                                                 |
| 1018    | 2     | 2     | 0      | 0      | Root;Bacteria                                                                                             |
| 1022    | 48    | 133   | 13     | 1723   | Root;Bacteria;Proteobacteria;Gammaproteobacteria;Alteromonadales;Alteromonadaceae;Alteromonas             |
| 1026    | 23    | 6     | 15     | 17     | Root;Bacteria;Proteobacteria;Alphaproteobacteria                                                          |
| 1027    | 0     | 0     | 0      | 118    | Root;Bacteria;Cyanobacteria;Cyanobacteria;Family II;GpIIa                                                 |
| 1028    | 0     | 0     | 4      | 0      | Root;Bacteria                                                                                             |
| 1029    | 6     | 0     | 0      | 4      | Root;Bacteria;Proteobacteria;Gammaproteobacteria;Alteromonadales;Colwelliaceae;Thalassomonas              |
| 1033    | 0     | 0     | 20     | 0      | Root;Bacteria;Proteobacteria;Alphaproteobacteria                                                          |
| 1035    | 0     | 0     | 0      | 12     | Root;Bacteria                                                                                             |
| 1037    | 0     | 0     | 36     | 0      | Root;Bacteria;Bacteroidetes;Flavobacteria;Flavobacteriales                                                |
| 1044    | 24    | 1     | 0      | 0      | Root;Bacteria;Proteobacteria;Gammaproteobacteria                                                          |
| 1051    | 1     | 14    | 0      | 0      | Root;Bacteria                                                                                             |
| 1059    | 0     | 0     | 0      | 2      | Root;Bacteria;Proteobacteria                                                                              |
| 1060    | 358   | 84    | 212    | 425    | Root;Bacteria;Proteobacteria;Alphaproteobacteria;Rhodobacterales;Rhodobacteraceae                         |
| 1063    | 274   | 9     | 0      | 0      | Root;Bacteria;Bacteroidetes;Sphingobacteria;Sphingobacteriales;Crenotrichaceae;Balneola                   |
| 1065    | 0     | 0     | 0      | 7      | Root;Bacteria;Cyanobacteria;Cyanobacteria;Family II;GpIIa                                                 |
| 1068    | 346   | 12    | 16     | 2      | Root;Bacteria                                                                                             |
| 1069    | 0     | 0     | 20     | 3      | Root;Bacteria;Proteobacteria                                                                              |
| 1072    | 177   | 0     | 0      | 0      | Root;Bacteria;Proteobacteria                                                                              |
| 1074    | 0     | 0     | 161    | 21     | Root;Bacteria;Proteobacteria;Gammaproteobacteria                                                          |
| 1076    | 1166  | 0     | 49     | 1      | Root;Bacteria;Proteobacteria;Gammaproteobacteria                                                          |
| 1079    | 23    | 1     | 30     | 21     | Root;Bacteria;Proteobacteria                                                                              |
| 1082    | 0     | 0     | 0      | 14     | Root;Bacteria;Proteobacteria;Gammaproteobacteria;Oceanospirillales                                        |
| 1087    | 0     | 0     | 0      | 3      | Root;Bacteria;Bacteroidetes;Sphingobacteria;Sphingobacteriales                                            |
| 1092    | 17    | 0     | 0      | 0      | Root;Bacteria;Proteobacteria;Gammaproteobacteria;Alteromonadales;Shewanellaceae;Shewanella                |
| 1097    | 7     | 2     | 30     | 44     | Root;Bacteria;Proteobacteria;Gammaproteobacteria                                                          |
| 1098    | 2     | 0     | 0      | 0      | Root;Bacteria                                                                                             |
| 1103    | 2     | 0     | 18     | 26     | Root;Bacteria;Proteobacteria;Alphaproteobacteria                                                          |
| 1106    | 6     | 0     | 0      | 1      | Root;Bacteria;Bacteroidetes;Flavobacteria;Flavobacteriales;Flavobacteriaceae;Tenacibaculum                |
| 1107    | 9     | 0     | 0      | 0      | Root;Bacteria;Bacteroidetes;Flavobacteria;Flavobacteriales;Flavobacteriaceae                              |
| 1112    | 8     | 0     | 0      | 0      | Root;Bacteria;Verrucomicrobia;Verrucomicrobiae;Verrucomicrobiales;Opitutaceae;Opitutus                    |
| 1116    | 3     | 0     | 0      | 0      | Root;Bacteria;Proteobacteria;Gammaproteobacteria                                                          |
| 1118    | 0     | 0     | 12     | 14     | Root;Bacteria;Planctomycetes;Planctomycetacia;Planctomycetales;Planctomycetaceae                          |
| 1120    | 4     | 0     | 0      | 0      | Root;Bacteria                                                                                             |
| 1124    | 6     | 0     | 0      | 0      | Root;Bacteria                                                                                             |
| 1129    | 0     | 0     | 7      | 20     | Root;Bacteria                                                                                             |
| 1133    | 0     | 6     | 0      | 0      | Root;Bacteria;Proteobacteria                                                                              |
| 1136    | 2     | 0     | 0      | 0      | Root;Bacteria                                                                                             |
| 1137    | 81    | 0     | 0      | 0      | Root;Bacteria;Proteobacteria                                                                              |
| 1139    | 68    | 18    | 37     | 78     | Root;Bacteria;Proteobacteria                                                                              |
| 1142    | 12    | 0     | 4      | 0      | Root;Bacteria;Proteobacteria                                                                              |
| 1143    | 87    | 52    | 1      | 0      | Root;Bacteria;Proteobacteria;Betaproteobacteria                                                           |
| 1145    | 217   | 109   | 0      | 360    | Root;Bacteria;Cyanobacteria;Cyanobacteria;Family II;GpIIa                                                 |
| 1146    | 0     | 0     | 6      | 1      | Root;Bacteria                                                                                             |



| #OTU ID | DNA25 | RNA25 | DNA100 | RNA100 | Consensus Lineage                                                                                  |
|---------|-------|-------|--------|--------|----------------------------------------------------------------------------------------------------|
| 1149    | 2     | 0     | 0      | 0      | Root;Bacteria;Proteobacteria                                                                       |
| 1154    | 0     | 0     | 2      | 6      | Root;Bacteria;Proteobacteria                                                                       |
| 1156    | 23    | 37    | 0      | 0      | Root;Bacteria;Cyanobacteria;Cyanobacteria                                                          |
| 1157    | 0     | 0     | 6      | 0      | Root;Bacteria;Proteobacteria                                                                       |
| 1159    | 0     | 0     | 0      | 39     | Root;Bacteria                                                                                      |
| 1161    | 0     | 3     | 0      | 0      | Root;Bacteria;Proteobacteria;Alphaproteobacteria                                                   |
| 1166    | 0     | 0     | 2      | 29     | Root;Bacteria;Proteobacteria;Betaproteobacteria;Burkholderiales                                    |
| 1168    | 0     | 0     | 176    | 36     | Root;Bacteria;Bacteroidetes;Sphingobacteria;Sphingobacteriales;Flexibacteraceae                    |
| 1178    | 0     | 0     | 12     | 4      | Root;Bacteria;Proteobacteria                                                                       |
| 1180    | 0     | 0     | 2      | 0      | Root;Bacteria;Proteobacteria;Gammaproteobacteria                                                   |
| 1184    | 11    | 0     | 0      | 0      | Root;Bacteria;Proteobacteria;Alphaproteobacteria                                                   |
| 1187    | 7     | 0     | 0      | 0      | Root;Bacteria;Proteobacteria;Gammaproteobacteria;Alteromonadales                                   |
| 1188    | 993   | 0     | 0      | 0      | Root;Bacteria                                                                                      |
| 1191    | 5     | 0     | 33     | 2      | Root;Bacteria;Proteobacteria;Deltaproteobacteria;Bdellovibrionales;Bacteriovoraceae; Bacteriovorax |
| 1196    | 0     | 0     | 0      | 9      | Root;Bacteria                                                                                      |
| 1198    | 0     | 0     | 0      | 4      | Root;Bacteria;Cyanobacteria;Cyanobacteria;Family II;GpIIa                                          |
| 1200    | 0     | 0     | 0      | 3      | Root;Bacteria                                                                                      |
| 1203    | 1     | 0     | 2      | 0      | Root;Bacteria;Proteobacteria;Gammaproteobacteria                                                   |
| 1204    | 39    | 0     | 14     | 0      | Root;Bacteria;Proteobacteria                                                                       |
| 1210    | 22    | 11    | 0      | 0      | Root;Bacteria                                                                                      |
| 1211    | 0     | 0     | 138    | 27     | Root;Bacteria;Bacteroidetes;Flavobacteria;Flavobacteriales;Flavobacteriaceae                       |
| 1212    | 0     | 0     | 10     | 8      | Root;Bacteria                                                                                      |
| 1215    | 0     | 0     | 1      | 1      | Root;Bacteria;Proteobacteria                                                                       |
| 1218    | 2781  | 44    | 42     | 4      | Root;Bacteria;Proteobacteria;Gammaproteobacteria;Oceanospirillales                                 |
| 1220    | 0     | 0     | 0      | 15     | Root;Bacteria                                                                                      |
| 1228    | 0     | 0     | 550    | 842    | Root;Bacteria                                                                                      |
| 1229    | 0     | 0     | 262    | 14     | Root;Bacteria;Proteobacteria                                                                       |
| 1233    | 0     | 0     | 2      | 0      | Root;Bacteria;Chlamydiae;Chlamydiae;Chlamydiales;Simkaniaceae;Simkania                             |
| 1235    | 15    | 0     | 0      | 0      | Root;Bacteria;Proteobacteria                                                                       |
| 1237    | 1     | 0     | 16     | 29     | Root;Bacteria;Proteobacteria;Betaproteobacteria                                                    |
| 1246    | 0     | 0     | 0      | 14     | Root;Bacteria;Proteobacteria                                                                       |
| 1247    | 0     | 398   | 0      | 0      | Root;Bacteria;Cyanobacteria;Cyanobacteria;Family II;GpIIa                                          |
| 1248    | 0     | 0     | 71     | 0      | Root;Bacteria;Proteobacteria;Alphaproteobacteria                                                   |
| 1251    | 62    | 34    | 0      | 85     | Root;Bacteria                                                                                      |
| 1255    | 48    | 6     | 18     | 2      | Root;Bacteria                                                                                      |
| 1259    | 13    | 0     | 24     | 0      | Root;Bacteria;Bacteroidetes;Flavobacteria;Flavobacteriales;Flavobacteriaceae                       |
| 1263    | 106   | 0     | 43     | 0      | Root;Bacteria;Proteobacteria;Gammaproteobacteria                                                   |
| 1265    | 0     | 1     | 0      | 1      | Root;Bacteria;Bacteroidetes;Sphingobacteria;Sphingobacteriales                                     |
| 1269    | 0     | 0     | 0      | 3      | Root;Bacteria;Proteobacteria                                                                       |
| 1274    | 699   | 33    | 35     | 0      | Root;Bacteria;Proteobacteria;Gammaproteobacteria                                                   |
| 1280    | 0     | 0     | 0      | 5      | Root;Bacteria                                                                                      |
| 1281    | 358   | 0     | 27     | 5      | Root;Bacteria;Verrucomicrobia;Verrucomicrobiae;Verrucomicrobiales;Opitutaceae;Opitutus             |
| 1289    | 14    | 0     | 4      | 0      | Root;Bacteria                                                                                      |
| 1298    | 0     | 0     | 0      | 3      | Root;Bacteria;Cyanobacteria;Cyanobacteria;Family II;GpIIa                                          |
| 1300    | 11    | 0     | 0      | 138    | Root;Bacteria;Cyanobacteria;Cyanobacteria                                                          |
| 1306    | 374   | 160   | 79     | 130    | Root;Bacteria;Proteobacteria;Alphaproteobacteria                                                   |
| 1314    | 5929  | 153   | 962    | 128    | Root;Bacteria;Proteobacteria                                                                       |
| 1315    | 0     | 0     | 0      | 7      | Root;Bacteria;Cyanobacteria;Cyanobacteria;Family II;GpIIa                                          |
| 1316    | 2     | 0     | 1      | 0      | Root;Bacteria;Bacteroidetes;Sphingobacteria;Sphingobacteriales;Flexibacteraceae                    |
| 1323    | 0     | 0     | 0      | 26     | Root;Bacteria;Proteobacteria;Gammaproteobacteria                                                   |
| 1327    | 0     | 0     | 0      | 8      | Root;Bacteria;Cyanobacteria;Cyanobacteria;Family II;GpIIa                                          |
| 1329    | 0     | 0     | 0      | 46     | Root;Bacteria;Cyanobacteria;Cyanobacteria;Family II;GpIIa                                          |
| 1335    | 1     | 1     | 0      | 1      | Root;Bacteria;Proteobacteria                                                                       |
| 1339    | 4     | 0     | 1      | 0      | Root;Bacteria;Proteobacteria;Gammaproteobacteria                                                   |
| 1344    | 209   | 58    | 82     | 156    | Root;Bacteria;Proteobacteria                                                                       |
| 1345    | 0     | 0     | 155    | 187    | Root;Bacteria                                                                                      |
| 1349    | 0     | 0     | 0      | 12     | Root;Bacteria                                                                                      |
| 1351    | 12    | 0     | 0      | 0      | Root;Bacteria;Cyanobacteria;Cyanobacteria;Family II;GpIIa                                          |
| 1354    | 852   | 43    | 0      | 0      | Root;Bacteria;Verrucomicrobia;Verrucomicrobiae;Verrucomicrobiales;Opitutaceae;Opitutus             |
| 1357    | 4     | 0     | 0      | 0      | Root;Bacteria;Bacteroidetes;Flavobacteria;Flavobacteriales;Flavobacteriaceae                       |
| 1360    | 0     | 0     | 0      | 2      | Root;Bacteria;Bacteroidetes;Flavobacteria;Flavobacteriales;Cryomorphaeae                           |
| 1364    | 679   | 0     | 0      | 0      | Root;Bacteria;Bacteroidetes;Flavobacteria;Flavobacteriales;Flavobacteriaceae                       |
| 1365    | 2608  | 78    | 23     | 0      | Root;Bacteria;Proteobacteria;Gammaproteobacteria                                                   |
| 1369    | 0     | 132   | 0      | 0      | Root;Bacteria;Proteobacteria                                                                       |
| 1370    | 4     | 0     | 0      | 0      | Root;Bacteria;Verrucomicrobia;Verrucomicrobiae;Verrucomicrobiales;Opitutaceae;Opitutus             |
| 1373    | 19    | 0     | 0      | 0      | Root;Bacteria                                                                                      |
| 1380    | 2     | 0     | 0      | 0      | Root;Bacteria                                                                                      |
| 1384    | 6     | 2     | 0      | 0      | Root;Bacteria;Proteobacteria                                                                       |
| 1395    | 1194  | 369   | 30     | 25     | Root;Bacteria;Proteobacteria                                                                       |
| 1397    | 20    | 0     | 0      | 23     | Root;Bacteria                                                                                      |
| 1398    | 0     | 5     | 0      | 53     | Root;Bacteria;Proteobacteria;Gammaproteobacteria;Oceanospirillales;Alcanivoraceae;Alcanivorax      |
| 1405    | 136   | 8     | 4      | 1      | Root;Bacteria;Bacteroidetes;Sphingobacteria;Sphingobacteriales;Flexibacteraceae                    |
| 1406    | 56    | 0     | 0      | 0      | Root;Bacteria;Proteobacteria;Alphaproteobacteria                                                   |
| 1410    | 0     | 0     | 0      | 9      | Root;Bacteria                                                                                      |
| 1419    | 4     | 0     | 0      | 0      | Root;Bacteria;Proteobacteria;Alphaproteobacteria                                                   |
| 1421    | 14    | 0     | 41     | 33     | Root;Bacteria;Proteobacteria;Alphaproteobacteria                                                   |
| 1425    | 0     | 0     | 262    | 2100   | Root;Bacteria;Cyanobacteria;Cyanobacteria;Family II;GpIIa                                          |

| #OTU ID | DNA25 | RNA25 | DNA100 | RNA100 | Consensus Lineage                                                                          |
|---------|-------|-------|--------|--------|--------------------------------------------------------------------------------------------|
| 1427    | 0     | 0     | 6      | 0      | Root;Bacteria;Proteobacteria;Gammaproteobacteria                                           |
| 1430    | 3     | 0     | 0      | 0      | Root;Bacteria;Proteobacteria                                                               |
| 1432    | 1152  | 0     | 54     | 4      | Root;Bacteria                                                                              |
| 1436    | 0     | 0     | 0      | 2      | Root;Bacteria                                                                              |
| 1437    | 0     | 0     | 25     | 66     | Root;Bacteria                                                                              |
| 1442    | 12    | 0     | 0      | 0      | Root;Bacteria;Proteobacteria                                                               |
| 1445    | 1     | 0     | 0      | 1      | Root;Bacteria                                                                              |
| 1449    | 22    | 4     | 0      | 0      | Root;Bacteria;Chlamydiae;Chlamydiae;Chlamydiales;Simkaniaceae;Simkania                     |
| 1452    | 0     | 0     | 36     | 23     | Root;Bacteria;Proteobacteria;Gammaproteobacteria;Chromatiales;Ectothiorhodospiraceae       |
| 1454    | 0     | 0     | 9      | 0      | Root;Bacteria;Proteobacteria                                                               |
| 1455    | 0     | 0     | 0      | 13     | Root;Bacteria;Cyanobacteria;Cyanobacteria;Family II;GpIIa                                  |
| 1457    | 27    | 7     | 0      | 0      | Root;Bacteria;Proteobacteria;Alphaproteobacteria                                           |
| 1461    | 0     | 0     | 0      | 2      | Root;Bacteria                                                                              |
| 1463    | 6     | 0     | 0      | 0      | Root;Bacteria;Proteobacteria;Gammaproteobacteria                                           |
| 1468    | 696   | 77    | 0      | 221    | Root;Bacteria                                                                              |
| 1477    | 0     | 0     | 49     | 55     | Root;Bacteria                                                                              |
| 1478    | 0     | 0     | 0      | 8      | Root;Bacteria;Proteobacteria                                                               |
| 1480    | 0     | 0     | 0      | 153    | Root;Bacteria;Proteobacteria                                                               |
| 1481    | 0     | 0     | 6      | 0      | Root;Bacteria                                                                              |
| 1482    | 33    | 0     | 0      | 0      | Root;Bacteria;Proteobacteria                                                               |
| 1488    | 15    | 0     | 0      | 0      | Root;Bacteria;Proteobacteria;Gammaproteobacteria;Vibrionales;Vibrionaceae;Vibrio           |
| 1491    | 0     | 0     | 34     | 115    | Root;Bacteria                                                                              |
| 1492    | 0     | 20    | 0      | 0      | Root;Bacteria                                                                              |
| 1495    | 1     | 0     | 1      | 0      | Root;Bacteria                                                                              |
| 1496    | 0     | 0     | 1      | 4      | Root;Bacteria;Chloroflexi;Anaerolineae                                                     |
| 1503    | 13    | 0     | 0      | 0      | Root;Bacteria;Proteobacteria;Alphaproteobacteria                                           |
| 1506    | 3171  | 46    | 14949  | 646    | Root;Bacteria;Proteobacteria;Alphaproteobacteria                                           |
| 1514    | 8     | 0     | 0      | 0      | Root;Bacteria;Bacteroidetes;Flavobacteria;Flavobacteriales;Flavobacteriaceae               |
| 1515    | 4     | 0     | 0      | 0      | Root;Bacteria;Proteobacteria                                                               |
| 1516    | 0     | 0     | 0      | 2      | Root;Bacteria;Proteobacteria;Betaproteobacteria;Burkholderiales                            |
| 1517    | 5     | 0     | 0      | 0      | Root;Bacteria;Bacteroidetes;Flavobacteria;Flavobacteriales;Flavobacteriaceae;Polaribacter  |
| 1519    | 0     | 0     | 12     | 3      | Root;Bacteria;Proteobacteria                                                               |
| 1525    | 3     | 1     | 0      | 0      | Root;Bacteria;Proteobacteria                                                               |
| 1530    | 0     | 0     | 0      | 9      | Root;Bacteria                                                                              |
| 1534    | 54    | 0     | 157    | 0      | Root;Bacteria                                                                              |
| 1538    | 13    | 0     | 0      | 0      | Root;Bacteria;Proteobacteria;Alphaproteobacteria                                           |
| 1541    | 1252  | 224   | 66     | 143    | Root;Bacteria;Proteobacteria;Alphaproteobacteria                                           |
| 1545    | 0     | 0     | 75     | 398    | Root;Bacteria                                                                              |
| 1546    | 0     | 4     | 0      | 0      | Root;Bacteria;Proteobacteria;Gammaproteobacteria                                           |
| 1553    | 0     | 0     | 7      | 44     | Root;Bacteria;Proteobacteria                                                               |
| 1554    | 4     | 0     | 0      | 0      | Root;Bacteria;Proteobacteria;Gammaproteobacteria                                           |
| 1561    | 2     | 0     | 0      | 0      | Root;Bacteria;Proteobacteria                                                               |
| 1568    | 0     | 0     | 70     | 63     | Root;Bacteria                                                                              |
| 1570    | 31    | 0     | 40     | 0      | Root;Bacteria;Proteobacteria                                                               |
| 1571    | 49    | 0     | 0      | 0      | Root;Bacteria;Proteobacteria;Gammaproteobacteria                                           |
| 1574    | 4     | 0     | 0      | 0      | Root;Bacteria;Proteobacteria                                                               |
| 1575    | 6     | 0     | 0      | 0      | Root;Bacteria;Proteobacteria                                                               |
| 1582    | 0     | 14    | 0      | 56     | Root;Bacteria;Cyanobacteria;Cyanobacteria;Family II;GpIIa                                  |
| 1583    | 0     | 0     | 0      | 34     | Root;Bacteria                                                                              |
| 1587    | 31    | 0     | 23     | 47     | Root;Bacteria                                                                              |
| 1588    | 0     | 0     | 17     | 14     | Root;Bacteria;Proteobacteria                                                               |
| 1591    | 0     | 0     | 0      | 4      | Root;Bacteria                                                                              |
| 1592    | 0     | 8     | 0      | 0      | Root;Bacteria;Bacteroidetes;Sphingobacteria;Sphingobacteriales;Flexibacteraceae;Roseivirga |
| 1595    | 0     | 0     | 103    | 320    | Root;Bacteria                                                                              |
| 1596    | 10824 | 163   | 176    | 1      | Root;Bacteria;Proteobacteria                                                               |
| 1597    | 0     | 3     | 43     | 17     | Root;Bacteria;Proteobacteria                                                               |
| 1602    | 2     | 1     | 0      | 5      | Root;Bacteria;Bacteroidetes;Sphingobacteria;Sphingobacteriales;Flexibacteraceae;Roseivirga |
| 1607    | 0     | 0     | 0      | 6      | Root;Bacteria;Proteobacteria;Gammaproteobacteria;Vibrionales;Vibrionaceae;Benecke          |
| 1609    | 4     | 0     | 0      | 36     | Root;Bacteria                                                                              |
| 1610    | 0     | 0     | 0      | 33     | Root;Bacteria;Cyanobacteria;Cyanobacteria;Family II;GpIIa                                  |
| 1611    | 0     | 0     | 14     | 3      | Root;Bacteria;Proteobacteria;Gammaproteobacteria                                           |
| 1616    | 4     | 0     | 481    | 196    | Root;Bacteria                                                                              |
| 1621    | 0     | 0     | 10     | 28     | Root;Bacteria                                                                              |
| 1623    | 0     | 0     | 0      | 2      | Root;Bacteria;Proteobacteria                                                               |
| 1624    | 23    | 0     | 0      | 0      | Root;Bacteria;Bacteroidetes;Flavobacteria;Flavobacteriales;Flavobacteriaceae               |
| 1626    | 2     | 0     | 0      | 0      | Root;Bacteria;Proteobacteria                                                               |
| 1627    | 0     | 0     | 7      | 0      | Root;Bacteria;Proteobacteria;Alphaproteobacteria                                           |
| 1631    | 187   | 0     | 11     | 346    | Root;Bacteria                                                                              |
| 1639    | 42    | 0     | 0      | 0      | Root;Bacteria;Proteobacteria;Gammaproteobacteria                                           |
| 1642    | 3     | 0     | 0      | 0      | Root;Bacteria                                                                              |
| 1643    | 65    | 0     | 218    | 323    | Root;Bacteria                                                                              |
| 1644    | 47    | 0     | 0      | 0      | Root;Bacteria;Proteobacteria;Alphaproteobacteria                                           |
| 1650    | 2     | 1     | 0      | 0      | Root;Bacteria;Planctomycetes;Planctomycetacia;Planctomycetales;Planctomycetaceae           |
| 1651    | 0     | 0     | 0      | 5      | Root;Bacteria;Proteobacteria;Gammaproteobacteria                                           |
| 1653    | 0     | 0     | 0      | 3      | Root;Bacteria                                                                              |
| 1656    | 17    | 0     | 0      | 0      | Root;Bacteria;Proteobacteria                                                               |
| 1658    | 12    | 0     | 0      | 0      | Root;Bacteria;Proteobacteria;Alphaproteobacteria                                           |

| #OTU ID | DNA25 | RNA25 | DNA100 | RNA100 | Consensus Lineage                                                                                                    |
|---------|-------|-------|--------|--------|----------------------------------------------------------------------------------------------------------------------|
| 1661    | 0     | 0     | 0      | 6      | Root;Bacteria;Cyanobacteria;Cyanobacteria;Family II;GpIIa                                                            |
| 1664    | 1364  | 126   | 58     | 107    | Root;Bacteria;Bacteroidetes;Flavobacteria;Flavobacteriales;Flavobacteriaceae                                         |
| 1665    | 0     | 3     | 0      | 0      | Root;Bacteria;Bacteroidetes;Sphingobacteria;Sphingobacteriales;Flexibacteraceae                                      |
| 1666    | 0     | 0     | 10     | 0      | Root;Bacteria;Bacteroidetes;Flavobacteria;Flavobacteriales;Flavobacteriaceae                                         |
| 1668    | 0     | 0     | 44     | 0      | Root;Bacteria;Proteobacteria                                                                                         |
| 1669    | 280   | 0     | 146    | 0      | Root;Bacteria;Proteobacteria                                                                                         |
| 1670    | 93    | 41    | 0      | 0      | Root;Bacteria;Proteobacteria;Gammaproteobacteria                                                                     |
| 1671    | 3     | 1     | 0      | 0      | Root;Bacteria;Proteobacteria                                                                                         |
| 1676    | 4     | 0     | 0      | 0      | Root;Bacteria;Bacteroidetes;Flavobacteria;Flavobacteriales;Cryomorphaeae                                             |
| 1682    | 0     | 0     | 210    | 32     | Root;Bacteria;Bacteroidetes;Flavobacteria;Flavobacteriales;Flavobacteriaceae                                         |
| 1685    | 0     | 0     | 0      | 46     | Root;Bacteria                                                                                                        |
| 1686    | 594   | 117   | 0      | 17     | Root;Bacteria;Proteobacteria;Alphaproteobacteria                                                                     |
| 1691    | 0     | 15    | 0      | 0      | Root;Bacteria                                                                                                        |
| 1692    | 0     | 8     | 0      | 0      | Root;Bacteria                                                                                                        |
| 1694    | 0     | 0     | 26     | 88     | Root;Bacteria                                                                                                        |
| 1695    | 0     | 0     | 0      | 2      | Root;Bacteria;Proteobacteria;Gammaproteobacteria                                                                     |
| 1697    | 137   | 0     | 0      | 0      | Root;Bacteria;Cyanobacteria;Cyanobacteria;Family II;GpIIa                                                            |
| 1698    | 0     | 0     | 0      | 21     | Root;Bacteria                                                                                                        |
| 1699    | 0     | 0     | 12     | 111    | Root;Bacteria;Verrucomicrobia;Verrucomicrobiae;Verrucomicrobiales;Subdivision 3; Subdivision 3_genera_incertae_sedis |
| 1704    | 0     | 0     | 123    | 6      | Root;Bacteria;Proteobacteria                                                                                         |
| 1705    | 0     | 0     | 85     | 55     | Root;Bacteria                                                                                                        |
| 1710    | 536   | 0     | 157    | 642    | Root;Bacteria;Cyanobacteria;Cyanobacteria;Family II;GpIIa                                                            |
| 1711    | 0     | 0     | 20     | 56     | Root;Bacteria                                                                                                        |
| 1712    | 0     | 0     | 17     | 87     | Root;Bacteria;Proteobacteria;Alphaproteobacteria                                                                     |
| 1713    | 31    | 1     | 1      | 0      | Root;Bacteria;Proteobacteria                                                                                         |
| 1718    | 0     | 0     | 0      | 4      | Root;Bacteria                                                                                                        |
| 1719    | 0     | 0     | 8      | 0      | Root;Bacteria;Proteobacteria;Gammaproteobacteria                                                                     |
| 1721    | 0     | 0     | 547    | 24     | Root;Bacteria;Proteobacteria                                                                                         |
| 1722    | 0     | 0     | 6      | 4      | Root;Bacteria;Proteobacteria;Gammaproteobacteria                                                                     |
| 1724    | 0     | 0     | 0      | 3      | Root;Bacteria                                                                                                        |
| 1725    | 3     | 0     | 0      | 0      | Root;Bacteria                                                                                                        |
| 1730    | 0     | 0     | 0      | 13     | Root;Bacteria;Proteobacteria;Alphaproteobacteria;Rhodobacterales;Rhodobacteraceae                                    |
| 1734    | 19    | 1     | 0      | 1      | Root;Bacteria;Proteobacteria;Deltaproteobacteria;Bdellovibrionales;Bacteriovoraceae; Bacteriovorax                   |
| 1737    | 17    | 1     | 91     | 59     | Root;Bacteria;Proteobacteria                                                                                         |
| 1742    | 380   | 86    | 0      | 0      | Root;Bacteria;Proteobacteria;Alphaproteobacteria                                                                     |
| 1747    | 0     | 0     | 9      | 0      | Root;Bacteria                                                                                                        |
| 1757    | 0     | 0     | 29     | 4      | Root;Bacteria;Planctomycetes;Planctomycetacia;Planctomycetales;Planctomycetaceae                                     |
| 1759    | 5     | 0     | 0      | 0      | Root;Bacteria;Proteobacteria;Gammaproteobacteria                                                                     |
| 1760    | 0     | 0     | 0      | 18     | Root;Bacteria;Proteobacteria;Gammaproteobacteria                                                                     |
| 1762    | 0     | 0     | 0      | 2      | Root;Bacteria                                                                                                        |
| 1765    | 0     | 0     | 0      | 6      | Root;Bacteria;Proteobacteria;Alphaproteobacteria                                                                     |
| 1768    | 0     | 0     | 0      | 5      | Root;Bacteria;Proteobacteria;Gammaproteobacteria                                                                     |
| 1772    | 3     | 0     | 0      | 0      | Root;Bacteria;Proteobacteria;Gammaproteobacteria                                                                     |
| 1773    | 0     | 0     | 0      | 72     | Root;Bacteria;Cyanobacteria;Cyanobacteria;Family II;GpIIa                                                            |
| 1776    | 4     | 0     | 0      | 0      | Root;Bacteria;Proteobacteria                                                                                         |
| 1778    | 405   | 7     | 0      | 0      | Root;Bacteria;Proteobacteria;Alphaproteobacteria                                                                     |
| 1782    | 0     | 0     | 225    | 0      | Root;Bacteria                                                                                                        |
| 1789    | 0     | 0     | 0      | 25     | Root;Bacteria;Bacteroidetes;Flavobacteria;Flavobacteriales;Flavobacteriaceae;Ulvibacter                              |
| 1790    | 0     | 0     | 210    | 32     | Root;Bacteria                                                                                                        |
| 1791    | 0     | 0     | 0      | 3      | Root;Bacteria                                                                                                        |
| 1793    | 0     | 0     | 0      | 13     | Root;Bacteria;Proteobacteria;Alphaproteobacteria                                                                     |
| 1796    | 0     | 0     | 0      | 5      | Root;Bacteria;Proteobacteria;Alphaproteobacteria                                                                     |
| 1798    | 0     | 0     | 0      | 4      | Root;Bacteria;Cyanobacteria;Cyanobacteria;Family II;GpIIa                                                            |
| 1799    | 0     | 0     | 0      | 17     | Root;Bacteria;Proteobacteria;Gammaproteobacteria                                                                     |
| 1804    | 0     | 15    | 0      | 0      | Root;Bacteria                                                                                                        |
| 1805    | 30    | 0     | 1552   | 476    | Root;Bacteria;Proteobacteria;Alphaproteobacteria                                                                     |
| 1808    | 6994  | 27    | 4745   | 44     | Root;Bacteria                                                                                                        |
| 1810    | 6     | 0     | 0      | 0      | Root;Bacteria;Actinobacteria;Actinobacteria                                                                          |
| 1811    | 362   | 509   | 26     | 126    | Root;Bacteria;Proteobacteria;Alphaproteobacteria;Rhodobacterales;Rhodobacteraceae                                    |
| 1821    | 0     | 0     | 11     | 0      | Root;Bacteria;Proteobacteria;Gammaproteobacteria                                                                     |
| 1823    | 126   | 1     | 0      | 2      | Root;Bacteria;Proteobacteria;Deltaproteobacteria;Bdellovibrionales;Bacteriovoraceae; Bacteriovorax                   |
| 1825    | 54    | 0     | 0      | 0      | Root;Bacteria;Proteobacteria                                                                                         |
| 1831    | 70    | 0     | 0      | 0      | Root;Bacteria;Cyanobacteria;Cyanobacteria;Family II;GpIIa                                                            |
| 1832    | 0     | 0     | 0      | 280    | Root;Bacteria;Cyanobacteria;Cyanobacteria;Family II;GpIIa                                                            |
| 1833    | 9     | 0     | 3      | 0      | Root;Bacteria;Proteobacteria;Gammaproteobacteria;Vibrionales;Vibrionaceae;Photobacterium                             |
| 1835    | 0     | 0     | 153    | 0      | Root;Bacteria;Proteobacteria                                                                                         |
| 1838    | 1     | 0     | 2      | 0      | Root;Bacteria;Lentisphaerae;Lentisphaerae                                                                            |
| 1840    | 62    | 0     | 0      | 0      | Root;Bacteria;Proteobacteria;Gammaproteobacteria                                                                     |
| 1843    | 6     | 0     | 1      | 0      | Root;Bacteria;Proteobacteria;Gammaproteobacteria;Alteromonadales;Incertae sedis 7; Saccharophagus                    |
| 1844    | 0     | 0     | 0      | 10     | Root;Bacteria                                                                                                        |
| 1853    | 0     | 0     | 17     | 9      | Root;Bacteria                                                                                                        |
| 1858    | 30    | 0     | 0      | 0      | Root;Bacteria;Proteobacteria                                                                                         |
| 1863    | 0     | 0     | 10     | 16     | Root;Bacteria                                                                                                        |
| 1866    | 137   | 40    | 0      | 0      | Root;Bacteria;Proteobacteria                                                                                         |
| 1868    | 0     | 0     | 0      | 82     | Root;Bacteria;Cyanobacteria;Cyanobacteria;Family II;GpIIa                                                            |
| 1874    | 0     | 0     | 0      | 31     | Root;Bacteria;Cyanobacteria;Cyanobacteria;Family II;GpIIa                                                            |

| #OTU ID | DNA25 | RNA25 | DNA100 | RNA100 | Consensus Lineage                                                                       |
|---------|-------|-------|--------|--------|-----------------------------------------------------------------------------------------|
| 1875    | 0     | 0     | 0      | 6      | Root;Bacteria;Cyanobacteria;Cyanobacteria;Family II;GpIIa                               |
| 1876    | 0     | 0     | 132    | 27     | Root;Bacteria;Cyanobacteria;Cyanobacteria;Family II;GpIIa                               |
| 1878    | 0     | 0     | 0      | 11     | Root;Bacteria;Cyanobacteria;Cyanobacteria;Family II;GpIIa                               |
| 1883    | 3     | 0     | 72     | 0      | Root;Bacteria                                                                           |
| 1885    | 6     | 0     | 0      | 0      | Root;Bacteria;Proteobacteria;Gammaproteobacteria                                        |
| 1894    | 32    | 0     | 20     | 152    | Root;Bacteria;Proteobacteria                                                            |
| 1896    | 0     | 0     | 97     | 66     | Root;Bacteria;Proteobacteria                                                            |
| 1897    | 0     | 0     | 277    | 95     | Root;Bacteria                                                                           |
| 1902    | 7     | 0     | 0      | 0      | Root;Bacteria                                                                           |
| 1903    | 2     | 0     | 0      | 0      | Root;Bacteria;Bacteroidetes;Sphingobacteria;Sphingobacteriales;Flexibacteraceae         |
| 1905    | 0     | 19    | 0      | 0      | Root;Bacteria;Proteobacteria;Alphaproteobacteria;Sphingomonadales;Sphingomonadaceae     |
| 1910    | 180   | 0     | 0      | 0      | Root;Bacteria;Proteobacteria                                                            |
| 1913    | 8     | 0     | 0      | 0      | Root;Bacteria;Proteobacteria                                                            |
| 1915    | 1     | 0     | 1      | 1      | Root;Bacteria                                                                           |
| 1918    | 7     | 0     | 0      | 0      | Root;Bacteria;Proteobacteria;Alphaproteobacteria                                        |
| 1920    | 0     | 0     | 6      | 4      | Root;Bacteria                                                                           |
| 1927    | 0     | 0     | 0      | 103    | Root;Bacteria;Proteobacteria;Gammaproteobacteria                                        |
| 1930    | 0     | 0     | 8      | 31     | Root;Bacteria;Proteobacteria                                                            |
| 1937    | 0     | 0     | 4      | 0      | Root;Bacteria;Proteobacteria;Alphaproteobacteria                                        |
| 1944    | 0     | 0     | 1      | 9      | Root;Bacteria;Bacteroidetes;Sphingobacteria;Sphingobacteriales;Flexibacteraceae         |
| 1945    | 2     | 4     | 0      | 13     | Root;Bacteria;Cyanobacteria;Cyanobacteria;Family II;GpIIa                               |
| 1949    | 34    | 2     | 3      | 0      | Root;Bacteria;Actinobacteria;Actinobacteria;Actinobacteridae;Actinomycetales            |
| 1952    | 176   | 0     | 0      | 0      | Root;Bacteria;Proteobacteria                                                            |
| 1953    | 2     | 0     | 0      | 0      | Root;Bacteria                                                                           |
| 1960    | 206   | 0     | 59     | 10     | Root;Bacteria;Proteobacteria;Gammaproteobacteria                                        |
| 1961    | 336   | 0     | 0      | 0      | Root;Bacteria;Proteobacteria;Gammaproteobacteria                                        |
| 1965    | 0     | 0     | 35     | 6      | Root;Bacteria;Proteobacteria                                                            |
| 1966    | 176   | 3     | 0      | 0      | Root;Bacteria;Proteobacteria;Alphaproteobacteria                                        |
| 1968    | 2794  | 40    | 336    | 21     | Root;Bacteria;Proteobacteria;Alphaproteobacteria                                        |
| 1969    | 0     | 0     | 0      | 5      | Root;Bacteria;Proteobacteria;Deltaproteobacteria                                        |
| 1975    | 0     | 0     | 4      | 9      | Root;Bacteria;Proteobacteria;Gammaproteobacteria                                        |
| 1980    | 0     | 0     | 1132   | 0      | Root;Bacteria;Proteobacteria                                                            |
| 1984    | 253   | 10    | 14     | 11     | Root;Bacteria;Bacteroidetes;Flavobacteria;Flavobacteriales                              |
| 1986    | 0     | 0     | 20     | 21     | Root;Bacteria                                                                           |
| 1990    | 164   | 148   | 0      | 28     | Root;Bacteria;Proteobacteria;Gammaproteobacteria;Oceanospirillales                      |
| 1991    | 4     | 0     | 0      | 0      | Root;Bacteria                                                                           |
| 1993    | 6765  | 184   | 1318   | 259    | Root;Bacteria;Proteobacteria;Gammaproteobacteria                                        |
| 1997    | 0     | 0     | 13     | 35     | Root;Bacteria;Proteobacteria                                                            |
| 1998    | 390   | 99    | 0      | 0      | Root;Bacteria;Proteobacteria;Gammaproteobacteria                                        |
| 1999    | 0     | 0     | 3      | 19     | Root;Bacteria                                                                           |
| 2001    | 5     | 0     | 10     | 2      | Root;Bacteria;Proteobacteria;Gammaproteobacteria                                        |
| 2002    | 0     | 0     | 21     | 50     | Root;Bacteria;Proteobacteria;Gammaproteobacteria                                        |
| 2003    | 2     | 0     | 0      | 0      | Root;Bacteria;Proteobacteria                                                            |
| 2006    | 0     | 0     | 2      | 35     | Root;Bacteria;Proteobacteria;Gammaproteobacteria                                        |
| 2008    | 52    | 17    | 0      | 0      | Root;Bacteria;Bacteroidetes;Flavobacteria;Flavobacteriales;Flavobacteriaceae            |
| 2009    | 0     | 0     | 23     | 24     | Root;Bacteria                                                                           |
| 2011    | 1226  | 194   | 0      | 0      | Root;Bacteria                                                                           |
| 2016    | 415   | 12    | 128    | 26     | Root;Bacteria;Proteobacteria;Gammaproteobacteria                                        |
| 2017    | 0     | 0     | 1      | 11     | Root;Bacteria                                                                           |
| 2022    | 811   | 255   | 0      | 11     | Root;Bacteria;Proteobacteria;Alphaproteobacteria                                        |
| 2028    | 0     | 0     | 0      | 41     | Root;Bacteria                                                                           |
| 2033    | 0     | 0     | 8      | 0      | Root;Bacteria                                                                           |
| 2034    | 2     | 1     | 0      | 0      | Root;Bacteria;Proteobacteria                                                            |
| 2036    | 0     | 0     | 0      | 3      | Root;Bacteria;Proteobacteria;Gammaproteobacteria                                        |
| 2037    | 0     | 0     | 0      | 14     | Root;Bacteria;Cyanobacteria;Cyanobacteria;Family II;GpIIa                               |
| 2040    | 0     | 0     | 0      | 2      | Root;Bacteria;Lentisphaerae;Lentisphaerae;Lentisphaerales;Lentisphaeraceae;Lentisphaera |
| 2041    | 55    | 0     | 0      | 0      | Root;Bacteria                                                                           |
| 2050    | 0     | 0     | 133    | 138    | Root;Bacteria                                                                           |
| 2052    | 0     | 0     | 9      | 20     | Root;Bacteria                                                                           |
| 2055    | 0     | 0     | 24     | 0      | Root;Bacteria;Proteobacteria                                                            |
| 2057    | 135   | 129   | 34     | 268    | Root;Bacteria;Proteobacteria;Alphaproteobacteria;Rhodospirillales                       |
| 2070    | 0     | 0     | 0      | 9      | Root;Bacteria;Cyanobacteria;Cyanobacteria;Family II;GpIIa                               |
| 2075    | 93    | 0     | 61     | 76     | Root;Bacteria;Proteobacteria;Alphaproteobacteria                                        |
| 2076    | 496   | 165   | 58     | 316    | Root;Bacteria;Proteobacteria;Alphaproteobacteria                                        |
| 2077    | 0     | 0     | 0      | 6      | Root;Bacteria;Bacteroidetes;Sphingobacteria;Sphingobacteriales;Flexibacteraceae         |
| 2086    | 0     | 0     | 5      | 0      | Root;Bacteria                                                                           |
| 2093    | 0     | 0     | 0      | 5      | Root;Bacteria                                                                           |
| 2096    | 22    | 24    | 0      | 0      | Root;Bacteria;Proteobacteria;Alphaproteobacteria;Rhodobacterales;Rhodobacteraceae       |
| 2098    | 5794  | 36    | 9661   | 288    | Root;Bacteria;Proteobacteria;Alphaproteobacteria                                        |
| 2104    | 0     | 0     | 2      | 67     | Root;Bacteria;Cyanobacteria;Cyanobacteria;Family II;GpIIa                               |
| 2105    | 118   | 12    | 0      | 0      | Root;Bacteria;Actinobacteria;Actinobacteria                                             |
| 2107    | 18    | 2     | 1      | 24     | Root;Bacteria;Proteobacteria                                                            |
| 2108    | 0     | 0     | 0      | 3      | Root;Bacteria                                                                           |
| 2112    | 0     | 0     | 0      | 9      | Root;Bacteria                                                                           |
| 2115    | 0     | 0     | 96     | 9      | Root;Bacteria;Proteobacteria                                                            |
| 2116    | 0     | 0     | 57     | 902    | Root;Bacteria;Proteobacteria                                                            |
| 2120    | 0     | 9     | 0      | 0      | Root;Bacteria;Proteobacteria                                                            |

| #OTU ID | DNA25 | RNA25 | DNA100 | RNA100 | Consensus Lineage                                                                                   |
|---------|-------|-------|--------|--------|-----------------------------------------------------------------------------------------------------|
| 2133    | 0     | 0     | 0      | 18     | Root;Bacteria                                                                                       |
| 2135    | 2     | 0     | 0      | 0      | Root;Bacteria;Proteobacteria                                                                        |
| 2137    | 31622 | 321   | 0      | 0      | Root;Bacteria;Proteobacteria                                                                        |
| 2140    | 1     | 0     | 3      | 0      | Root;Bacteria;Proteobacteria                                                                        |
| 2146    | 29    | 0     | 0      | 0      | Root;Bacteria;Cyanobacteria;Cyanobacteria;Family II;GpIIa                                           |
| 2147    | 0     | 0     | 0      | 2      | Root;Bacteria;Proteobacteria;Gammaproteobacteria                                                    |
| 2148    | 580   | 51    | 0      | 0      | Root;Bacteria;Proteobacteria;Gammaproteobacteria                                                    |
| 2149    | 0     | 0     | 0      | 14     | Root;Bacteria;Proteobacteria                                                                        |
| 2154    | 0     | 0     | 103    | 238    | Root;Bacteria                                                                                       |
| 2155    | 5803  | 241   | 228    | 158    | Root;Bacteria;Proteobacteria;Gammaproteobacteria                                                    |
| 2158    | 0     | 0     | 10     | 0      | Root;Bacteria                                                                                       |
| 2159    | 252   | 3     | 11     | 0      | Root;Bacteria;Proteobacteria                                                                        |
| 2160    | 0     | 0     | 4453   | 0      | Root;Bacteria;Proteobacteria                                                                        |
| 2164    | 0     | 0     | 0      | 2      | Root;Bacteria                                                                                       |
| 2165    | 0     | 0     | 2      | 9      | Root;Bacteria                                                                                       |
| 2170    | 1123  | 467   | 86     | 318    | Root;Bacteria;Proteobacteria;Alphaproteobacteria;Rhodobacterales;Rhodobacteraceae                   |
| 2172    | 0     | 0     | 11     | 41     | Root;Bacteria;Verrucomicrobia;Verrucomicrobiae;Verrucomicrobiales                                   |
| 2173    | 0     | 0     | 49     | 125    | Root;Bacteria;Proteobacteria;Gammaproteobacteria;Oceanospirillales                                  |
| 2174    | 139   | 3     | 224    | 18     | Root;Bacteria                                                                                       |
| 2175    | 68    | 6     | 0      | 28     | Root;Bacteria;Cyanobacteria;Cyanobacteria;Family II;GpIIa                                           |
| 2179    | 0     | 0     | 128    | 62     | Root;Bacteria;Proteobacteria                                                                        |
| 2180    | 8     | 1     | 0      | 0      | Root;Bacteria                                                                                       |
| 2182    | 19    | 0     | 394    | 100    | Root;Bacteria                                                                                       |
| 2184    | 0     | 0     | 4      | 0      | Root;Bacteria                                                                                       |
| 2185    | 0     | 24    | 0      | 170    | Root;Bacteria;Proteobacteria                                                                        |
| 2187    | 9     | 0     | 0      | 0      | Root;Bacteria;Proteobacteria;Gammaproteobacteria                                                    |
| 2188    | 33    | 2     | 0      | 0      | Root;Bacteria;Planctomycetes;Planctomycetacia;Planctomycetales;Planctomycetaceae                    |
| 2190    | 3     | 0     | 0      | 20     | Root;Bacteria;Proteobacteria;Alphaproteobacteria                                                    |
| 2192    | 0     | 0     | 0      | 7      | Root;Bacteria                                                                                       |
| 2195    | 312   | 73    | 126    | 643    | Root;Bacteria                                                                                       |
| 2200    | 44    | 0     | 171    | 619    | Root;Bacteria;Cyanobacteria;Cyanobacteria;Family II;GpIIa                                           |
| 2206    | 0     | 0     | 28     | 18     | Root;Bacteria                                                                                       |
| 2207    | 266   | 0     | 8      | 0      | Root;Bacteria;Proteobacteria                                                                        |
| 2209    | 968   | 46    | 90     | 0      | Root;Bacteria;Bacteroidetes;Flavobacteria;Flavobacteriales;Flavobacteriaceae                        |
| 2211    | 1     | 0     | 4      | 0      | Root;Bacteria                                                                                       |
| 2213    | 0     | 0     | 0      | 6      | Root;Bacteria;Cyanobacteria;Cyanobacteria;Family II;GpIIa                                           |
| 2217    | 4     | 0     | 0      | 0      | Root;Bacteria;Proteobacteria                                                                        |
| 2218    | 0     | 0     | 2      | 0      | Root;Bacteria;Firmicutes;"Bacilli";Bacillales;"Paenibacillaceae";"Paenibacillaceae 1";Paenibacillus |
| 2229    | 1     | 1     | 0      | 0      | Root;Bacteria;Proteobacteria                                                                        |
| 2239    | 0     | 0     | 15     | 0      | Root;Bacteria;Proteobacteria                                                                        |
| 2240    | 24    | 0     | 0      | 0      | Root;Bacteria;Verrucomicrobia;Verrucomicrobiae;Verrucomicrobiales;Opitutaceae;Opitutus              |
| 2243    | 0     | 0     | 2      | 5      | Root;Bacteria;Proteobacteria;Alphaproteobacteria                                                    |
| 2245    | 0     | 0     | 31     | 41     | Root;Bacteria                                                                                       |
| 2248    | 0     | 0     | 4      | 0      | Root;Bacteria;Proteobacteria                                                                        |
| 2252    | 0     | 0     | 0      | 861    | Root;Bacteria;Cyanobacteria;Cyanobacteria;Family II;GpIIa                                           |
| 2253    | 0     | 0     | 0      | 9      | Root;Bacteria;Cyanobacteria;Cyanobacteria;Family II;GpIIa                                           |
| 2256    | 19    | 0     | 0      | 0      | Root;Bacteria;Proteobacteria                                                                        |
| 2260    | 0     | 1     | 0      | 1      | Root;Bacteria;Bacteroidetes;Sphingobacteria;Sphingobacteriales;Saprospiraceae                       |
| 2265    | 4     | 10    | 0      | 0      | Root;Bacteria;Proteobacteria;Alphaproteobacteria;Rhodobacterales;Rhodobacteraceae                   |
| 2277    | 0     | 0     | 0      | 16     | Root;Bacteria;Proteobacteria                                                                        |
| 2278    | 14    | 0     | 0      | 0      | Root;Bacteria;Proteobacteria                                                                        |
| 2282    | 5     | 0     | 0      | 0      | Root;Bacteria;Proteobacteria;Alphaproteobacteria                                                    |
| 2283    | 9     | 15    | 0      | 0      | Root;Bacteria;Proteobacteria;Alphaproteobacteria                                                    |
| 2284    | 19    | 0     | 3      | 0      | Root;Bacteria;Proteobacteria;Gammaproteobacteria                                                    |
| 2286    | 0     | 3     | 0      | 0      | Root;Bacteria;Bacteroidetes;Flavobacteria;Flavobacteriales;Flavobacteriaceae                        |
| 2287    | 0     | 0     | 0      | 8      | Root;Bacteria                                                                                       |
| 2290    | 11    | 0     | 0      | 0      | Root;Bacteria;Cyanobacteria;Cyanobacteria;Family II;GpIIa                                           |
| 2292    | 99    | 54    | 0      | 0      | Root;Bacteria;Proteobacteria;Alphaproteobacteria                                                    |
| 2293    | 28    | 0     | 0      | 0      | Root;Bacteria;Bacteroidetes;Flavobacteria;Flavobacteriales;Cryomorphaeae;Fluviicola                 |
| 2296    | 0     | 0     | 51     | 71     | Root;Bacteria                                                                                       |
| 2300    | 0     | 0     | 3      | 0      | Root;Bacteria                                                                                       |
| 2301    | 6     | 0     | 1      | 17     | Root;Bacteria;Proteobacteria;Alphaproteobacteria                                                    |
| 2303    | 2566  | 21    | 654    | 22     | Root;Bacteria;Proteobacteria                                                                        |
| 2306    | 0     | 0     | 34     | 26     | Root;Bacteria                                                                                       |
| 2308    | 0     | 0     | 6      | 36     | Root;Bacteria;Proteobacteria                                                                        |
| 2310    | 12    | 1     | 0      | 0      | Root;Bacteria;Proteobacteria                                                                        |
| 2312    | 0     | 0     | 0      | 29     | Root;Bacteria                                                                                       |
| 2321    | 0     | 0     | 58     | 0      | Root;Bacteria;Proteobacteria                                                                        |
| 2326    | 74    | 35    | 0      | 0      | Root;Bacteria;Bacteroidetes;Flavobacteria;Flavobacteriales;Flavobacteriaceae;Tenacibaculum          |
| 2335    | 1291  | 42    | 125    | 48     | Root;Bacteria;Bacteroidetes;Sphingobacteria;Sphingobacteriales;Flexibacteraceae                     |
| 2337    | 0     | 0     | 0      | 2502   | Root;Bacteria;Cyanobacteria;Cyanobacteria;Family II;GpIIa                                           |
| 2339    | 324   | 0     | 3167   | 147    | Root;Bacteria                                                                                       |
| 2343    | 6     | 0     | 40     | 2617   | Root;Bacteria;Cyanobacteria;Cyanobacteria;Family II;GpIIa                                           |
| 2346    | 0     | 0     | 7      | 2      | Root;Bacteria;Proteobacteria                                                                        |
| 2347    | 0     | 0     | 23     | 27     | Root;Bacteria                                                                                       |
| 2348    | 1     | 0     | 1      | 0      | Root;Bacteria;Proteobacteria;Gammaproteobacteria                                                    |
| 2355    | 0     | 0     | 0      | 1256   | Root;Bacteria;Cyanobacteria;Cyanobacteria;Family II;GpIIa                                           |

| #OTU ID | DNA25  | RNA25 | DNA100 | RNA100 | Consensus Lineage                                                                                  |
|---------|--------|-------|--------|--------|----------------------------------------------------------------------------------------------------|
| 2358    | 0      | 0     | 580    | 227    | Root;Bacteria;Proteobacteria;Gammaproteobacteria                                                   |
| 2359    | 1      | 0     | 58     | 0      | Root;Bacteria                                                                                      |
| 2360    | 11     | 0     | 132    | 26     | Root;Bacteria;Proteobacteria                                                                       |
| 2361    | 18     | 19    | 0      | 10     | Root;Bacteria                                                                                      |
| 2362    | 0      | 0     | 0      | 17     | Root;Bacteria                                                                                      |
| 2367    | 0      | 0     | 0      | 5      | Root;Bacteria;Proteobacteria;Alphaproteobacteria                                                   |
| 2368    | 0      | 0     | 0      | 7      | Root;Bacteria;Cyanobacteria;Cyanobacteria;Family II;GpIIa                                          |
| 2372    | 0      | 0     | 0      | 76     | Root;Bacteria;Cyanobacteria;Cyanobacteria;Family II;GpIIa                                          |
| 2377    | 0      | 0     | 18     | 0      | Root;Bacteria                                                                                      |
| 2378    | 0      | 0     | 0      | 4      | Root;Bacteria                                                                                      |
| 2379    | 25     | 0     | 0      | 0      | Root;Bacteria;Proteobacteria;Alphaproteobacteria                                                   |
| 2381    | 0      | 0     | 14     | 17     | Root;Bacteria                                                                                      |
| 2382    | 0      | 0     | 6      | 0      | Root;Bacteria                                                                                      |
| 2383    | 25     | 0     | 32     | 39     | Root;Bacteria;Proteobacteria;Deltaproteobacteria;Desulfuromonales;Geobacteraceae; Geopsychrobacter |
| 2385    | 0      | 0     | 4      | 8      | Root;Bacteria                                                                                      |
| 2386    | 17     | 0     | 0      | 0      | Root;Bacteria;Verrucomicrobia;Verrucomicrobiae;Verrucomicrobiales;Opitutaceae;Opitutus             |
| 2389    | 0      | 0     | 0      | 2      | Root;Bacteria;Proteobacteria                                                                       |
| 2392    | 0      | 0     | 0      | 37     | Root;Bacteria;Cyanobacteria;Cyanobacteria;Family II;GpIIa                                          |
| 2396    | 13     | 0     | 0      | 0      | Root;Bacteria;Cyanobacteria;Cyanobacteria;Family II;GpIIa                                          |
| 2397    | 0      | 0     | 0      | 7      | Root;Bacteria                                                                                      |
| 2405    | 0      | 0     | 8      | 1      | Root;Bacteria;Proteobacteria                                                                       |
| 2410    | 3      | 0     | 0      | 0      | Root;Bacteria;Bacteroidetes;Sphingobacteria;Sphingobacteriales;Flexibacteraceae                    |
| 2411    | 208    | 0     | 0      | 0      | Root;Bacteria;Proteobacteria;Alphaproteobacteria                                                   |
| 2414    | 17     | 18    | 0      | 1      | Root;Bacteria;Planctomycetes;Planctomycetacia;Planctomycetales;Planctomycetaceae                   |
| 2415    | 0      | 0     | 0      | 5      | Root;Bacteria                                                                                      |
| 2416    | 3      | 0     | 0      | 0      | Root;Bacteria;Proteobacteria                                                                       |
| 2417    | 46     | 1     | 3      | 0      | Root;Bacteria;Proteobacteria                                                                       |
| 2419    | 0      | 0     | 13     | 0      | Root;Bacteria                                                                                      |
| 2428    | 0      | 0     | 0      | 14     | Root;Bacteria;Proteobacteria                                                                       |
| 2429    | 0      | 75    | 0      | 0      | Root;Bacteria;Proteobacteria;Alphaproteobacteria;Rhodobacterales;Rhodobacteraceae                  |
| 2432    | 3      | 0     | 0      | 0      | Root;Bacteria;Proteobacteria                                                                       |
| 2433    | 16     | 26    | 0      | 51     | Root;Bacteria;Proteobacteria;Alphaproteobacteria                                                   |
| 2434    | 0      | 0     | 12     | 7      | Root;Bacteria                                                                                      |
| 2435    | 0      | 0     | 5      | 5      | Root;Bacteria;Proteobacteria                                                                       |
| 2437    | 0      | 0     | 0      | 3      | Root;Bacteria;Proteobacteria                                                                       |
| 2440    | 387    | 224   | 31     | 195    | Root;Bacteria;Proteobacteria;Gammaproteobacteria                                                   |
| 2444    | 0      | 0     | 3128   | 9686   | Root;Bacteria;Cyanobacteria;Cyanobacteria;Family II;GpIIa                                          |
| 2446    | 0      | 0     | 0      | 5      | Root;Bacteria;Proteobacteria;Gammaproteobacteria                                                   |
| 2453    | 5      | 0     | 0      | 0      | Root;Bacteria;Proteobacteria;Alphaproteobacteria;Rhodobacterales;Rhodobacteraceae                  |
| 2455    | 2      | 0     | 61     | 383    | Root;Bacteria                                                                                      |
| 2460    | 10     | 0     | 0      | 0      | Root;Bacteria;Proteobacteria;Gammaproteobacteria;Vibrionales;Vibrionaceae;Photobacterium           |
| 2461    | 0      | 0     | 23     | 0      | Root;Bacteria;Proteobacteria;Alphaproteobacteria                                                   |
| 2471    | 7      | 2     | 85     | 297    | Root;Bacteria                                                                                      |
| 2474    | 58     | 0     | 57     | 94     | Root;Bacteria;Bacteroidetes;Flavobacteria;Flavobacteriales                                         |
| 2475    | 0      | 0     | 0      | 2      | Root;Bacteria;Proteobacteria;Gammaproteobacteria;Legionellales;Coxiellaceae;Coxiella               |
| 2476    | 632    | 0     | 17     | 0      | Root;Bacteria;Bacteroidetes;Flavobacteria;Flavobacteriales;Flavobacteriaceae                       |
| 2482    | 0      | 0     | 5      | 1      | Root;Bacteria;Proteobacteria                                                                       |
| 2483    | 3      | 0     | 68     | 59     | Root;Bacteria                                                                                      |
| 2484    | 0      | 0     | 0      | 58     | Root;Bacteria                                                                                      |
| 2487    | 0      | 0     | 0      | 15     | Root;Bacteria                                                                                      |
| 2489    | 201    | 22    | 87     | 114    | Root;Bacteria;Bacteroidetes;Flavobacteria;Flavobacteriales;Cryomorpaceae                           |
| 2490    | 61     | 0     | 0      | 0      | Root;Bacteria;Bacteroidetes;Flavobacteria;Flavobacteriales;Flavobacteriaceae                       |
| 2494    | 0      | 0     | 2      | 0      | Root;Bacteria                                                                                      |
| 2496    | 1304   | 36    | 521    | 68     | Root;Bacteria;Bacteroidetes;Flavobacteria;Flavobacteriales;Flavobacteriaceae                       |
| 2498    | 8      | 0     | 884    | 713    | Root;Bacteria                                                                                      |
| 2499    | 0      | 0     | 0      | 2      | Root;Bacteria;Bacteroidetes;Flavobacteria;Flavobacteriales                                         |
| 2500    | 13     | 15    | 0      | 103    | Root;Bacteria;Cyanobacteria;Cyanobacteria;Family II;GpIIa                                          |
| 2505    | 0      | 4     | 0      | 0      | Root;Bacteria;Proteobacteria                                                                       |
| 2508    | 0      | 0     | 0      | 14     | Root;Bacteria                                                                                      |
| 2513    | 0      | 0     | 0      | 9      | Root;Bacteria                                                                                      |
| 2514    | 2      | 0     | 0      | 0      | Root;Bacteria;Proteobacteria                                                                       |
| 2516    | 0      | 0     | 8      | 3      | Root;Bacteria                                                                                      |
| 2517    | 0      | 0     | 0      | 2      | Root;Bacteria;Proteobacteria                                                                       |
| 2518    | 66     | 18    | 0      | 0      | Root;Bacteria;Proteobacteria;Gammaproteobacteria                                                   |
| 2522    | 395    | 23    | 13     | 17     | Root;Bacteria;Bacteroidetes;Flavobacteria;Flavobacteriales                                         |
| 2530    | 160    | 10    | 0      | 0      | Root;Bacteria;Bacteroidetes;Flavobacteria;Flavobacteriales;Flavobacteriaceae                       |
| 2540    | 0      | 0     | 25     | 2      | Root;Bacteria;Proteobacteria                                                                       |
| 2541    | 0      | 0     | 0      | 12     | Root;Bacteria;Verrucomicrobia;Verrucomicrobiae;Verrucomicrobiales                                  |
| 2549    | 129749 | 81992 | 29034  | 282498 | Root;Bacteria;Cyanobacteria;Cyanobacteria;Family II;GpIIa                                          |
| 2554    | 0      | 0     | 255    | 45     | Root;Bacteria;Proteobacteria                                                                       |
| 2559    | 0      | 0     | 0      | 2      | Root;Bacteria;Proteobacteria;Gammaproteobacteria                                                   |
| 2563    | 0      | 0     | 0      | 4      | Root;Bacteria;Proteobacteria;Alphaproteobacteria;Rhodobacterales;Rhodobacteraceae                  |
| 2565    | 0      | 0     | 0      | 3      | Root;Bacteria;Proteobacteria;Gammaproteobacteria                                                   |
| 2568    | 0      | 1     | 98     | 0      | Root;Bacteria;Proteobacteria                                                                       |
| 2570    | 0      | 0     | 0      | 11     | Root;Bacteria;Cyanobacteria;Cyanobacteria;Family II;GpIIa                                          |
| 2574    | 0      | 0     | 0      | 28     | Root;Bacteria;Proteobacteria;Betaproteobacteria                                                    |
| 2575    | 0      | 0     | 0      | 5      | Root;Bacteria;Cyanobacteria;Cyanobacteria;Family II;GpIIa                                          |

| #OTU ID | DNA25 | RNA25 | DNA100 | RNA100 | Consensus Lineage                                                                                  |
|---------|-------|-------|--------|--------|----------------------------------------------------------------------------------------------------|
| 2587    | 22    | 14    | 0      | 0      | Root;Bacteria;Proteobacteria;Gammaproteobacteria;Alteromonadales                                   |
| 2588    | 5     | 0     | 0      | 0      | Root;Bacteria;Proteobacteria;Gammaproteobacteria                                                   |
| 2592    | 0     | 48    | 0      | 0      | Root;Bacteria                                                                                      |
| 2599    | 12    | 0     | 77     | 11     | Root;Bacteria;Proteobacteria                                                                       |
| 2604    | 0     | 0     | 0      | 4      | Root;Bacteria;Cyanobacteria;Cyanobacteria;Family II;GpIIa                                          |
| 2606    | 0     | 0     | 0      | 2      | Root;Bacteria;Cyanobacteria;Cyanobacteria;Family II;GpIIa                                          |
| 2609    | 3     | 0     | 0      | 0      | Root;Bacteria;Proteobacteria;Alphaproteobacteria;Rhodobacterales;Rhodobacteraceae                  |
| 2611    | 0     | 7     | 0      | 0      | Root;Bacteria;Bacteroidetes;Flavobacteria;Flavobacteriales;Flavobacteriaceae                       |
| 2616    | 0     | 2     | 0      | 17     | Root;Bacteria;Proteobacteria                                                                       |
| 2617    | 0     | 0     | 2      | 0      | Root;Bacteria;Chlamydiae;Chlamydiae;Chlamydiales                                                   |
| 2625    | 0     | 0     | 0      | 35     | Root;Bacteria                                                                                      |
| 2629    | 0     | 0     | 0      | 187    | Root;Bacteria;Cyanobacteria;Cyanobacteria;Family II;GpIIa                                          |
| 2634    | 0     | 0     | 2      | 1      | Root;Bacteria;Chlamydiae;Chlamydiae;Chlamydiales;Simkaniaceae;Simkania                             |
| 2638    | 3945  | 119   | 1379   | 324    | Root;Bacteria;Proteobacteria                                                                       |
| 2640    | 0     | 0     | 4      | 5      | Root;Bacteria;Proteobacteria                                                                       |
| 2644    | 0     | 0     | 32     | 157    | Root;Bacteria;Proteobacteria;Alphaproteobacteria                                                   |
| 2645    | 3     | 0     | 0      | 0      | Root;Bacteria;Bacteroidetes;Flavobacteria;Flavobacteriales                                         |
| 2649    | 0     | 0     | 0      | 36     | Root;Bacteria;Proteobacteria                                                                       |
| 2650    | 0     | 0     | 0      | 4      | Root;Bacteria;Bacteroidetes;Flavobacteria;Flavobacteriales                                         |
| 2662    | 0     | 0     | 80     | 0      | Root;Bacteria;Proteobacteria;Alphaproteobacteria                                                   |
| 2663    | 0     | 0     | 20     | 41     | Root;Bacteria;Proteobacteria;Alphaproteobacteria                                                   |
| 2673    | 761   | 177   | 24     | 101    | Root;Bacteria;Proteobacteria                                                                       |
| 2676    | 4     | 0     | 3      | 7      | Root;Bacteria;Verrucomicrobia;Verrucomicrobiae;Verrucomicrobiales                                  |
| 2677    | 0     | 0     | 37     | 17     | Root;Bacteria;Cyanobacteria;Cyanobacteria;Family II;GpIIa                                          |
| 2681    | 7     | 0     | 0      | 0      | Root;Bacteria;Proteobacteria                                                                       |
| 2688    | 0     | 0     | 0      | 2      | Root;Bacteria;Proteobacteria;Betaproteobacteria;Burkholderiales;Alcaligenaceae;Castellaniella      |
| 2692    | 0     | 0     | 0      | 4      | Root;Bacteria;Proteobacteria                                                                       |
| 2693    | 593   | 0     | 30     | 0      | Root;Bacteria;Proteobacteria                                                                       |
| 2694    | 15    | 0     | 0      | 0      | Root;Bacteria;Proteobacteria;Alphaproteobacteria                                                   |
| 2695    | 96    | 0     | 141    | 0      | Root;Bacteria;Proteobacteria                                                                       |
| 2700    | 390   | 64    | 677    | 869    | Root;Bacteria;Proteobacteria                                                                       |
| 2701    | 114   | 0     | 204    | 0      | Root;Bacteria;Proteobacteria                                                                       |
| 2710    | 4     | 0     | 0      | 0      | Root;Bacteria;Proteobacteria                                                                       |
| 2711    | 142   | 0     | 0      | 44     | Root;Bacteria;Proteobacteria                                                                       |
| 2712    | 161   | 51    | 0      | 0      | Root;Bacteria;Proteobacteria;Gammaproteobacteria;Vibrionales;Vibrionaceae;Vibrio                   |
| 2716    | 42    | 0     | 383    | 0      | Root;Bacteria                                                                                      |
| 2717    | 71    | 40    | 0      | 0      | Root;Bacteria;Proteobacteria;Alphaproteobacteria                                                   |
| 2720    | 0     | 0     | 116    | 9      | Root;Bacteria;Proteobacteria                                                                       |
| 2721    | 0     | 0     | 3      | 0      | Root;Bacteria;Proteobacteria;Alphaproteobacteria                                                   |
| 2733    | 0     | 0     | 2      | 0      | Root;Bacteria;Planctomycetes;Planctomycetacia;Planctomycetales;Planctomycetaceae                   |
| 2736    | 0     | 0     | 31     | 22     | Root;Bacteria                                                                                      |
| 2738    | 5     | 0     | 0      | 0      | Root;Bacteria;Proteobacteria                                                                       |
| 2740    | 14    | 0     | 0      | 0      | Root;Bacteria;Proteobacteria;Gammaproteobacteria                                                   |
| 2742    | 0     | 0     | 76     | 19     | Root;Bacteria;Proteobacteria;Alphaproteobacteria                                                   |
| 2745    | 0     | 0     | 0      | 9      | Root;Bacteria;Cyanobacteria;Cyanobacteria;Family II;GpIIa                                          |
| 2746    | 36    | 2     | 17     | 16     | Root;Bacteria                                                                                      |
| 2747    | 7     | 0     | 0      | 0      | Root;Bacteria;Bacteroidetes;Sphingobacteria;Sphingobacteriales                                     |
| 2751    | 0     | 0     | 0      | 7      | Root;Bacteria                                                                                      |
| 2760    | 0     | 0     | 58     | 153    | Root;Bacteria;Proteobacteria;Gammaproteobacteria                                                   |
| 2766    | 0     | 0     | 2      | 23     | Root;Bacteria;Proteobacteria;Betaproteobacteria;Burkholderiales                                    |
| 2767    | 0     | 0     | 0      | 3      | Root;Bacteria                                                                                      |
| 2768    | 57    | 0     | 571    | 153    | Root;Bacteria;Proteobacteria;Gammaproteobacteria                                                   |
| 2776    | 0     | 0     | 57     | 87     | Root;Bacteria;Actinobacteria;Actinobacteria                                                        |
| 2777    | 236   | 101   | 0      | 0      | Root;Bacteria;Proteobacteria;Gammaproteobacteria                                                   |
| 2782    | 61    | 0     | 2      | 0      | Root;Bacteria;Proteobacteria                                                                       |
| 2783    | 12    | 0     | 0      | 0      | Root;Bacteria;Proteobacteria                                                                       |
| 2784    | 0     | 0     | 38     | 0      | Root;Bacteria;Proteobacteria;Deltaproteobacteria;Bdellovibrionales;Bacteriovoraceae; Bacteriovorax |
| 2785    | 0     | 0     | 0      | 156    | Root;Bacteria;Proteobacteria                                                                       |
| 2786    | 1     | 1     | 0      | 0      | Root;Bacteria                                                                                      |
| 2787    | 142   | 24    | 0      | 0      | Root;Bacteria;Verrucomicrobia;Verrucomicrobiae;Verrucomicrobiales;Opitutaceae;Opitutus             |
| 2789    | 49    | 0     | 26     | 0      | Root;Bacteria;Proteobacteria                                                                       |
| 2795    | 124   | 100   | 0      | 0      | Root;Bacteria;Proteobacteria;Gammaproteobacteria                                                   |
| 2797    | 0     | 0     | 0      | 25     | Root;Bacteria                                                                                      |
| 2804    | 0     | 0     | 0      | 4      | Root;Bacteria;Cyanobacteria;Cyanobacteria;Family II;GpIIa                                          |
| 2805    | 0     | 0     | 0      | 4      | Root;Bacteria                                                                                      |
| 2806    | 1     | 0     | 12     | 0      | Root;Bacteria;Proteobacteria                                                                       |
| 2809    | 0     | 0     | 14     | 11     | Root;Bacteria;Proteobacteria;Alphaproteobacteria                                                   |
| 2815    | 0     | 0     | 38     | 25     | Root;Bacteria;Proteobacteria;Gammaproteobacteria                                                   |
| 2816    | 41    | 0     | 0      | 0      | Root;Bacteria                                                                                      |
| 2817    | 0     | 0     | 0      | 11     | Root;Bacteria                                                                                      |
| 2820    | 0     | 0     | 0      | 10     | Root;Bacteria                                                                                      |
| 2823    | 58    | 1     | 0      | 0      | Root;Bacteria                                                                                      |
| 2825    | 9     | 0     | 0      | 0      | Root;Bacteria;Proteobacteria                                                                       |
| 2826    | 0     | 0     | 2      | 0      | Root;Bacteria;Proteobacteria;Deltaproteobacteria                                                   |
| 2827    | 157   | 17    | 18     | 2      | Root;Bacteria;Proteobacteria;Gammaproteobacteria                                                   |
| 2828    | 0     | 0     | 0      | 2      | Root;Bacteria;Proteobacteria;Deltaproteobacteria;Bdellovibrionales;Bacteriovoraceae; Bacteriovorax |
| 2833    | 122   | 0     | 0      | 1      | Root;Bacteria;Cyanobacteria;Cyanobacteria;Family II;GpIIa                                          |

| #OTU ID | DNA25 | RNA25 | DNA100 | RNA100 | Consensus Lineage                                                                                 |
|---------|-------|-------|--------|--------|---------------------------------------------------------------------------------------------------|
| 2834    | 0     | 0     | 0      | 3      | Root;Bacteria                                                                                     |
| 2836    | 2     | 0     | 0      | 0      | Root;Bacteria;Proteobacteria                                                                      |
| 2841    | 0     | 0     | 4      | 0      | Root;Bacteria                                                                                     |
| 2842    | 10    | 0     | 0      | 0      | Root;Bacteria;Proteobacteria                                                                      |
| 2843    | 123   | 0     | 0      | 1      | Root;Bacteria;Verrucomicrobia;Verrucomicrobiae;Verrucomicrobiales;Opitutaceae;Opitutus            |
| 2849    | 0     | 0     | 8      | 19     | Root;Bacteria                                                                                     |
| 2851    | 12    | 0     | 0      | 0      | Root;Bacteria                                                                                     |
| 2852    | 0     | 0     | 0      | 16     | Root;Bacteria;Proteobacteria;Gammaproteobacteria                                                  |
| 2853    | 0     | 0     | 8      | 0      | Root;Bacteria;Proteobacteria;Alphaproteobacteria                                                  |
| 2856    | 0     | 0     | 0      | 9      | Root;Bacteria;Cyanobacteria;Cyanobacteria;Family II;GpIIa                                         |
| 2858    | 0     | 0     | 16     | 0      | Root;Bacteria;Proteobacteria                                                                      |
| 2861    | 0     | 27    | 0      | 0      | Root;Bacteria;Proteobacteria;Gammaproteobacteria;Alteromonadales                                  |
| 2867    | 6     | 0     | 0      | 0      | Root;Bacteria                                                                                     |
| 2869    | 0     | 0     | 0      | 52     | Root;Bacteria;Cyanobacteria;Cyanobacteria;Family II;GpIIa                                         |
| 2870    | 0     | 0     | 33     | 0      | Root;Bacteria                                                                                     |
| 2871    | 0     | 0     | 1      | 1      | Root;Bacteria;Planctomycetes;Planctomycetacia;Planctomycetales;Planctomycetaceae                  |
| 2872    | 403   | 52    | 13     | 29     | Root;Bacteria                                                                                     |
| 2876    | 0     | 0     | 0      | 7      | Root;Bacteria;Proteobacteria;Gammaproteobacteria;Chromatiales;Ectothiorhodospiraceae              |
| 2878    | 0     | 0     | 0      | 41     | Root;Bacteria;Cyanobacteria;Cyanobacteria;Family II;GpIIa                                         |
| 2880    | 0     | 11    | 0      | 0      | Root;Bacteria;Proteobacteria;Alphaproteobacteria;Rhodobacterales;Rhodobacteraceae;Stappia         |
| 2882    | 24    | 0     | 0      | 0      | Root;Bacteria;Proteobacteria                                                                      |
| 2883    | 19    | 0     | 28     | 15     | Root;Bacteria                                                                                     |
| 2890    | 0     | 0     | 576    | 795    | Root;Bacteria                                                                                     |
| 2892    | 0     | 0     | 64     | 24     | Root;Bacteria;Proteobacteria;Alphaproteobacteria                                                  |
| 2894    | 8     | 0     | 0      | 0      | Root;Bacteria                                                                                     |
| 2904    | 4     | 1     | 19     | 3      | Root;Bacteria;Planctomycetes;Planctomycetacia;Planctomycetales;Planctomycetaceae                  |
| 2905    | 0     | 0     | 6      | 0      | Root;Bacteria                                                                                     |
| 2910    | 4     | 5     | 64     | 49     | Root;Bacteria;Proteobacteria                                                                      |
| 2911    | 0     | 0     | 96     | 286    | Root;Bacteria                                                                                     |
| 2913    | 0     | 15    | 0      | 0      | Root;Bacteria;Cyanobacteria;Cyanobacteria;Family VIII;GpVIII                                      |
| 2915    | 8     | 0     | 0      | 26     | Root;Bacteria;Cyanobacteria;Cyanobacteria;Family II;GpIIa                                         |
| 2916    | 0     | 0     | 54     | 48     | Root;Bacteria                                                                                     |
| 2918    | 7     | 0     | 35     | 24     | Root;Bacteria                                                                                     |
| 2922    | 0     | 0     | 55     | 14     | Root;Bacteria                                                                                     |
| 2924    | 0     | 0     | 4      | 5      | Root;Bacteria;Proteobacteria;Alphaproteobacteria                                                  |
| 2929    | 0     | 17    | 0      | 11     | Root;Bacteria;Proteobacteria;Alphaproteobacteria;Rhodospirillales;Rhodospirillaceae;Thalassospira |
| 2932    | 10    | 1     | 0      | 0      | Root;Bacteria;Proteobacteria                                                                      |
| 2933    | 0     | 0     | 0      | 299    | Root;Bacteria;Cyanobacteria;Cyanobacteria;Family II;GpIIa                                         |
| 2934    | 2     | 0     | 0      | 0      | Root;Bacteria;Proteobacteria;Gammaproteobacteria                                                  |
| 2940    | 0     | 0     | 1      | 1      | Root;Bacteria                                                                                     |
| 2946    | 4     | 0     | 0      | 0      | Root;Bacteria;Proteobacteria                                                                      |
| 2948    | 0     | 0     | 68     | 43     | Root;Bacteria                                                                                     |
| 2949    | 0     | 0     | 0      | 6      | Root;Bacteria;Proteobacteria;Alphaproteobacteria;Rhizobiales;Hyphomicrobiaceae;Devosia            |
| 2953    | 0     | 0     | 75     | 2      | Root;Bacteria                                                                                     |
| 2954    | 0     | 0     | 0      | 56     | Root;Bacteria;Cyanobacteria;Cyanobacteria;Family II;GpIIa                                         |
| 2957    | 0     | 0     | 151    | 0      | Root;Bacteria;Proteobacteria                                                                      |
| 2960    | 0     | 0     | 0      | 8      | Root;Bacteria;Proteobacteria;Gammaproteobacteria;Alteromonadales                                  |
| 2961    | 34    | 0     | 20     | 182    | Root;Bacteria;Proteobacteria                                                                      |
| 2964    | 53    | 0     | 0      | 0      | Root;Bacteria                                                                                     |
| 2973    | 363   | 0     | 28     | 26     | Root;Bacteria;Proteobacteria                                                                      |
| 2974    | 2702  | 0     | 245    | 0      | Root;Bacteria;Proteobacteria                                                                      |
| 2981    | 63    | 0     | 0      | 0      | Root;Bacteria                                                                                     |
| 2983    | 0     | 0     | 113    | 0      | Root;Bacteria;Proteobacteria                                                                      |
| 2985    | 0     | 0     | 55     | 17     | Root;Bacteria                                                                                     |
| 2986    | 0     | 0     | 2      | 0      | Root;Bacteria;Proteobacteria;Gammaproteobacteria                                                  |
| 2989    | 5     | 0     | 0      | 0      | Root;Bacteria;Proteobacteria                                                                      |
| 2992    | 2     | 0     | 0      | 0      | Root;Bacteria                                                                                     |
| 2994    | 0     | 0     | 0      | 114    | Root;Bacteria;Cyanobacteria;Cyanobacteria;Family II;GpIIa                                         |
| 2997    | 0     | 0     | 0      | 19     | Root;Bacteria;Cyanobacteria;Cyanobacteria;Family II;GpIIa                                         |
| 3002    | 0     | 13    | 0      | 0      | Root;Bacteria                                                                                     |



Supplemental Table S2

| OTU | Phylogeny of best BLAST hit (refseq_genomic)                                                                                                                       | e value   | percent identity |
|-----|--------------------------------------------------------------------------------------------------------------------------------------------------------------------|-----------|------------------|
| 1   | Bacteria; Cyanobacteria; Prochlorales; Prochlorococcaceae; Prochlorococcus. Prochlorococcus marinus subsp. marinus str. CCMP1375                                   | 3.00E-145 | 90.29            |
| 2   | Bacteria; Proteobacteria; Deltaproteobacteria; Desulfuromonadales; Geobacteraceae; Geobacter. Geobacter sp. FRC-32                                                 | 9.00E-115 | 90.57            |
| 5   | Bacteria; Proteobacteria; Alphaproteobacteria; SAR116 cluster; Candidatus Puniceispirillum. Candidatus Puniceispirillum marinum IMCC1322                           | 1.00E-107 | 88.77            |
| 11  | Bacteria; Cyanobacteria; Prochlorales; Prochlorococcaceae; Prochlorococcus. Prochlorococcus marinus str. MIT 9202                                                  | 0         | 99.71            |
| 12  | Bacteria; Cyanobacteria; Prochlorales; Prochlorococcaceae; Prochlorococcus. Prochlorococcus marinus str. NATL1A                                                    | 0         | 98.38            |
| 14  | Bacteria; Proteobacteria; Betaproteobacteria; Burkholderiales; Oxalobacteraceae; Herbaspirillum. Herbaspirillum seropedicae SmR1                                   | 6.00E-76  | 86.3             |
| 16  | Bacteria; Proteobacteria; Deltaproteobacteria; Desulfobivibrionales; Desulfomicrobiaceae; Desulfomicrobium. Desulfomicrobium baculatum DSM 4028                    | 8.00E-78  | 86.36            |
| 23  | Bacteria; Proteobacteria; Alphaproteobacteria; Rickettsiales; SAR11 cluster; Candidatus Pelagibacter. Candidatus Pelagibacter sp. HTCC7211                         | 0         | 93.72            |
| 29  | Bacteria; Proteobacteria; Alphaproteobacteria; Rickettsiales; SAR11 cluster; Candidatus Pelagibacter. Candidatus Pelagibacter ubique HTCC1002                      | 5.00E-107 | 89.36            |
| 35  | Bacteria; Chloroflexi; Dehalococcoidetes; Dehalococcoides. Dehalococcoides sp. GT                                                                                  | 8.00E-72  | 85.93            |
| 37  | Bacteria; Proteobacteria; Deltaproteobacteria; Desulfuromonadales; Geobacteraceae; Geobacter. Geobacter sulfurreducens PCA                                         | 1.00E-156 | 90.43            |
| 38  | Bacteria; Proteobacteria; Gammaproteobacteria; Pseudomonadales; Pseudomonadaceae; Pseudomonas; Pseudomonas coronafaciens. Pseudomonas syringae pv. oryzae str. 1_6 | 1.00E-117 | 87.59            |
| 40  | Bacteria; Proteobacteria; Gammaproteobacteria; Chromatiales; Halothiobacillaceae; Halothiobacillus. Halothiobacillus neapolitanus c2                               | 7.00E-94  | 87.06            |
| 44  | Bacteria; Proteobacteria; Deltaproteobacteria; Desulfuromonadales; Geobacteraceae; Geobacter. Geobacter sp. FRC-32                                                 | 1.00E-166 | 91.52            |
| 48  | Bacteria; Proteobacteria; Deltaproteobacteria; Desulfobacteriales; Desulfobulbaceae; Desulfobulbus. Desulfobulbus propionicus DSM 2032                             | 2.00E-112 | 90               |
| 49  | Bacteria; Proteobacteria; Alphaproteobacteria; Rickettsiales; SAR11 cluster; Candidatus Pelagibacter. Candidatus Pelagibacter sp. HTCC7211                         | 0         | 96.22            |
| 52  | Bacteria; Proteobacteria; Alphaproteobacteria; Rhizobiales; Brucellaceae; Brucella. Brucella abortus bv. 5 str. B3196                                              | 2.00E-139 | 92.92            |
| 53  | Bacteria; Proteobacteria; Alphaproteobacteria; SAR116 cluster; Candidatus Puniceispirillum. Candidatus Puniceispirillum marinum IMCC1322                           | 0         | 98.35            |
| 54  | Bacteria; Dictyoglomi; Dictyoglomales; Dictyoglomaceae; Dictyoglomus. Dictyoglomus turgidum DSM 6724                                                               | 1.00E-39  | 85.45            |
| 55  | Bacteria; Verrucomicrobia; Opitutae; Puniceococcales; Puniceococcaceae; Coraliomargarita. Coraliomargarita akajimensis DSM 45221                                   | 4.00E-129 | 92               |
| 61  | Bacteria; Proteobacteria; Gammaproteobacteria; Alteromonadales; Alteromonadaceae; Alteromonas. Alteromonas macleodii str. 'Deep ecotype'                           | 0         | 96.91            |
| 62  | Bacteria; Proteobacteria; Gammaproteobacteria; Legionellales; Legionellaceae; Legionella. Legionella pneumophila 2300/99 Alcoy                                     | 2.00E-162 | 90.79            |
| 64  | Bacteria; Proteobacteria; Gammaproteobacteria; Chromatiales; Ectothiorhodospiraceae; Alkalilimnicola. Alkalilimnicola ehrlichii MLHE-1                             | 1.00E-163 | 91.23            |
| 65  | Bacteria; Proteobacteria; Gammaproteobacteria; Chromatiales; Halothiobacillaceae; Halothiobacillus. Halothiobacillus neapolitanus c2                               | 2.00E-103 | 89.17            |
| 67  | Bacteria; Cyanobacteria; Prochlorales; Prochlorococcaceae; Prochlorococcus. Prochlorococcus marinus str. MIT 9515                                                  | 0         | 96.04            |
| 68  | Bacteria; Proteobacteria; Alphaproteobacteria; Rhizobiales; Brucellaceae; Ochrobactrum. Ochrobactrum anthropi ATCC 49188                                           | 6.00E-119 | 87.81            |
| 69  | Bacteria; Proteobacteria; Alphaproteobacteria; Rickettsiales; SAR11 cluster; Candidatus Pelagibacter. Candidatus Pelagibacter sp. HTCC7211                         | 7.00E-134 | 95.91            |
| 72  | Bacteria; Cyanobacteria; Prochlorales; Prochlorococcaceae; Prochlorococcus. Prochlorococcus marinus str. MIT 9202                                                  | 5.00E-131 | 95.38            |
| 73  | Bacteria; Cyanobacteria; Prochlorales; Prochlorococcaceae; Prochlorococcus. Prochlorococcus marinus str. MIT 9202                                                  | 2.00E-123 | 96.82            |
| 74  | Bacteria; Proteobacteria; Alphaproteobacteria; Rhizobiales; Bartonellaceae; Bartonella. Bartonella quintana str. Toulouse                                          | 4.00E-126 | 88.43            |
| 84  | Bacteria; Proteobacteria; Gammaproteobacteria; Oceanospirillales; Alcanivoracaceae; Alcanivorax. Alcanivorax sp. DG881                                             | 1.00E-175 | 92.61            |
| 91  | Bacteria; Proteobacteria; Gammaproteobacteria; Alteromonadales; Colwelliaceae; Colwellia. Colwellia psychrerythraea 34H                                            | 3.00E-102 | 89.01            |
| 92  | Bacteria; Proteobacteria; Alphaproteobacteria; Rhizobiales; Phyllobacteriaceae; Mesorhizobium. Mesorhizobium loti MAFF303099                                       | 1.00E-175 | 92.08            |
| 95  | Bacteria; Proteobacteria; Alphaproteobacteria; Rickettsiales; Anaplasmataceae; Ehrlichia. Ehrlichia chaffeensis str. Arkansas                                      | 1.00E-80  | 86.25            |
| 100 | Bacteria; Proteobacteria; Gammaproteobacteria. gamma proteobacterium NOR51-B                                                                                       | 6.00E-82  | 87.01            |
| 101 | Bacteria; Bacteroidetes; Flavobacteria; Flavobacteriales; Flavobacteriaceae; Polaribacter. Polaribacter sp. MED152                                                 | 1.00E-156 | 94.21            |
| 114 | Bacteria; Proteobacteria; Deltaproteobacteria; Desulfuromonadales; Geobacteraceae; Geobacter. Geobacter uraniireducens Rf4                                         | 4.00E-151 | 89.47            |
| 115 | Bacteria; Proteobacteria; Alphaproteobacteria; Rickettsiales; SAR11 cluster; Candidatus Pelagibacter. Candidatus Pelagibacter sp. HTCC7211                         | 4.00E-175 | 96.5             |
| 117 | Bacteria; Proteobacteria; Deltaproteobacteria; Desulfuromonadales; Geobacteraceae; Geobacter. Geobacter bemidjiensis Bem                                           | 1.00E-147 | 90               |
| 120 | Bacteria; Proteobacteria; Gammaproteobacteria. gamma proteobacterium NOR51-B                                                                                       | 0         | 94.18            |
| 124 | Bacteria; Proteobacteria; Alphaproteobacteria; Rhizobiales; Brucellaceae; Ochrobactrum. Ochrobactrum anthropi ATCC 49188                                           | 2.00E-112 | 90.75            |

| OTU | Phylogeny of best BLAST hit (refseq_genomic)                                                                                                                  | e value   | percent identity |
|-----|---------------------------------------------------------------------------------------------------------------------------------------------------------------|-----------|------------------|
| 127 | Bacteria; Proteobacteria; Gammaproteobacteria; Pasteurellales; Pasteurellaceae; Haemophilus. Haemophilus influenzae F3031                                     | 4.00E-132 | 88.45            |
| 130 | Bacteria; Proteobacteria; Alphaproteobacteria; Rhizobiales; Brucellaceae; Ochrobactrum. Ochrobactrum anthropi ATCC 49188                                      | 5.00E-107 | 91.59            |
| 133 | Bacteria; Actinobacteria; Actinobacteridae; Bifidobacteriales; Bifidobacteriaceae; Bifidobacterium. Bifidobacterium angulatum DSM 20098                       | 1.00E-45  | 87.38            |
| 135 | Bacteria; Cyanobacteria; Prochlorales; Prochlorococcaceae; Prochlorococcus. Prochlorococcus marinus str. MIT 9515                                             | 4.00E-178 | 98.6             |
| 139 | Bacteria; Proteobacteria; Alphaproteobacteria; Rhodobacterales; Rhodobacteraceae; Ruegeria. Ruegeria pomeroyi DSS-3                                           | 0         | 96.32            |
| 144 | Bacteria; Proteobacteria; Deltaproteobacteria; Myxococcales; Cystobacterineae; Myxococcaceae; Anaeromyxobacter. Anaeromyxobacter sp. Fw109-5                  | 7.00E-131 | 88.57            |
| 150 | Bacteria; Proteobacteria; Epsilonproteobacteria; Campylobacteriales; Helicobacteraceae; Helicobacter. Helicobacter winghamensis ATCC BAA-430                  | 9.00E-35  | 85.94            |
| 154 | Bacteria; Verrucomicrobia; Opitutae; Puniceococcales; Puniceococcaceae; Coraliomargarita. Coraliomargarita akajimensis DSM 45221                              | 3.00E-105 | 90.11            |
| 155 | Bacteria; Proteobacteria; Gammaproteobacteria; Pasteurellales; Pasteurellaceae; Actinobacillus. Actinobacillus succinogenes 130Z                              | 1.00E-157 | 90.46            |
| 162 | Bacteria; Verrucomicrobia; Opitutae; Puniceococcales; Puniceococcaceae; Coraliomargarita. Coraliomargarita akajimensis DSM 45221                              | 4.00E-117 | 90.57            |
| 163 | Bacteria; Bacteroidetes; Flavobacteria; Flavobacteriales; Flavobacteriaceae; Cellulophaga. Cellulophaga algicola DSM 14237                                    | 2.00E-91  | 87.47            |
| 164 | Bacteria; Cyanobacteria; Prochlorales; Prochlorococcaceae; Prochlorococcus. Prochlorococcus marinus str. NATL2A                                               | 0         | 99.75            |
| 168 | Bacteria; Proteobacteria; Gammaproteobacteria; Oceanospirillales; Hahellaceae; Hahella. Hahella chejuensis KCTC 2396                                          | 1.00E-163 | 92.45            |
| 174 | Bacteria; Proteobacteria; Gammaproteobacteria; Oceanospirillales; Alcanivoracaceae; Alcanivorax. Alcanivorax borkumensis SK2                                  | 8.00E-140 | 88.93            |
| 184 | Bacteria; Proteobacteria; Deltaproteobacteria; Desulfovibrionales; Desulfomicrobiaceae; Desulfomicrobium. Desulfomicrobium baculatum DSM 4028                 | 3.00E-62  | 84               |
| 187 | Bacteria; Proteobacteria; Alphaproteobacteria; Sphingomonadales; Erythrobacteraceae; Erythrobacter. Erythrobacter sp. NAP1                                    | 8.00E-103 | 89.11            |
| 199 | Bacteria; Proteobacteria; Gammaproteobacteria; Oceanospirillales; Hahellaceae; Hahella. Hahella chejuensis KCTC 2396                                          | 2.00E-149 | 91.67            |
| 207 | Bacteria; Cyanobacteria; Prochlorales; Prochlorococcaceae; Prochlorococcus. Prochlorococcus marinus str. MIT 9202                                             | 0         | 99.71            |
| 209 | Bacteria; Proteobacteria; Alphaproteobacteria; Rhizobiales; Bartonellaceae; Bartonella. Bartonella bacilliformis KC583                                        | 1.00E-166 | 91.97            |
| 215 | Bacteria; Bacteroidetes; Sphingobacteria; Sphingobacteriales; Rhodothermaceae; Rhodothermus. Rhodothermus marinus DSM 4252                                    | 4.00E-160 | 90.31            |
| 217 | Bacteria; Proteobacteria; Alphaproteobacteria; Rhodobacterales; Rhodobacteraceae; Rhodobacter. Rhodobacter sphaeroides KD131                                  | 0         | 93.19            |
| 232 | Bacteria; Proteobacteria; Alphaproteobacteria; Rickettsiales; SAR11 cluster; Candidatus Pelagibacter. Candidatus Pelagibacter ubique HTCC1062                 | 0         | 92.66            |
| 233 | Bacteria; Firmicutes; Bacillales; Bacillaceae; Bacillus. Bacillus megaterium DSM 319                                                                          | 2.00E-100 | 86.58            |
| 237 | Bacteria; Proteobacteria; Alphaproteobacteria; Rickettsiales; SAR11 cluster; Candidatus Pelagibacter. Candidatus Pelagibacter sp. HTCC7211                    | 0         | 96.3             |
| 240 | Bacteria; Proteobacteria; Gammaproteobacteria; OMG group; SAR92 clade. gamma proteobacterium HTCC2207                                                         | 1.00E-82  | 86.65            |
| 242 | Bacteria; Spirochaetes; Spirochaetales; Spirochaetaceae; Spirochaeta. Spirochaeta thermophila DSM 6192                                                        | 7.00E-106 | 89.46            |
| 246 | Bacteria; Proteobacteria; Gammaproteobacteria; Thiotrichales; Francisellaceae; Francisella. Francisella philomiragia subsp. philomiragia ATCC 25015           | 0         | 100              |
| 247 | Bacteria; Proteobacteria; Alphaproteobacteria; Rickettsiales; SAR11 cluster. alpha proteobacterium HIMB114                                                    | 7.00E-134 | 89.03            |
| 249 | Bacteria; Firmicutes; Clostridia; Clostridiales; Lachnospiraceae; Catonella. Catonella morbi ATCC 51271                                                       | 5.00E-58  | 84               |
| 251 | Bacteria; Proteobacteria; Alphaproteobacteria; Rickettsiales; SAR11 cluster; Candidatus Pelagibacter. Candidatus Pelagibacter ubique HTCC1062                 | 3.00E-179 | 94.42            |
| 253 | Bacteria; Proteobacteria; Gammaproteobacteria; Alteromonadales; Shewanellaceae; Shewanella. Shewanella sp. ANA-3                                              | 1.00E-76  | 85.71            |
| 254 | Bacteria; Proteobacteria; Alphaproteobacteria; Rickettsiales; SAR11 cluster; Candidatus Pelagibacter. Candidatus Pelagibacter ubique HTCC1002                 | 4.00E-157 | 90.89            |
| 256 | Bacteria; Proteobacteria; Gammaproteobacteria; Alteromonadales; Shewanellaceae; Shewanella. Shewanella baltica OS223                                          | 3.00E-81  | 86.29            |
| 257 | Bacteria; Proteobacteria; Alphaproteobacteria; SAR116 cluster; Candidatus Puniceispirillum. Candidatus Puniceispirillum marinum IMCC1322                      | 9.00E-164 | 97.56            |
| 262 | Bacteria; Firmicutes; Bacillales; Macrocooccus. Macrocooccus caseolyticus JCSC5402                                                                            | 2.00E-75  | 86.36            |
| 263 | Bacteria; Actinobacteria; Actinobacteridae; Actinomycetales; Propionibacterineae; Nocardioideae; Kribbella. Kribbella flavida DSM 17836                       | 4.00E-123 | 86.98            |
| 268 | Bacteria; Actinobacteria; Actinobacteridae; Actinomycetales; Corynebacterineae; Corynebacteriaceae; Corynebacterium. Corynebacterium kroppenstedtii DSM 44385 | 3.00E-90  | 87.68            |
| 269 | Bacteria; Proteobacteria; Gammaproteobacteria; Aeromonadales; Aeromonadaceae; Aeromonas. Aeromonas salmonicida subsp. salmonicida A449                        | 4.00E-92  | 88.07            |
| 270 | Bacteria; Proteobacteria; Gammaproteobacteria; Alteromonadales; Shewanellaceae; Shewanella. Shewanella baltica OS223                                          | 1.00E-83  | 86.86            |
| 275 | Bacteria; Proteobacteria; Deltaproteobacteria; Desulfuromonadales; Pelobacteraceae; Pelobacter. Pelobacter propionicus DSM 2379                               | 3.00E-139 | 88.3             |
| 278 | Bacteria; Actinobacteria; Actinobacteridae; Actinomycetales; Micrococccineae; Intrasporangiaceae; Janibacter. Janibacter sp. HTCC2649                         | 2.00E-91  | 87.75            |

| OTU | Phylogeny of best BLAST hit (refseq_genomic)                                                                                                              | e value   | percent identity |
|-----|-----------------------------------------------------------------------------------------------------------------------------------------------------------|-----------|------------------|
| 284 | Bacteria; Proteobacteria; Zetaproteobacteria; Mariprofundales; Mariprofundaceae; Mariprofundus. Mariprofundus ferrooxydans PV-1                           | 4.00E-77  | 86.89            |
| 285 | Bacteria; Proteobacteria; Gammaproteobacteria; Chromatiales; Ectothiorhodospiraceae; Nitrococcus. Nitrococcus mobilis Nb-231                              | 4.00E-95  | 85.25            |
| 287 | Bacteria; Proteobacteria; Alphaproteobacteria; Rhodospirillales; Rhodospirillaceae; Rhodospirillum. Rhodospirillum centenum SW                            | 5.00E-147 | 89.57            |
| 288 | Bacteria; Cyanobacteria; Prochlorales; Prochlorococcaceae; Prochlorococcus. Prochlorococcus marinus str. NATL2A                                           | 0         | 96.88            |
| 289 | Bacteria; Proteobacteria; Deltaproteobacteria; Syntrophobacteriales; Syntrophaceae; Syntrophus. Syntrophus aciditrophicus SB                              | 2.00E-137 | 88.63            |
| 291 | Bacteria; Proteobacteria; Gammaproteobacteria; Pseudomonadales; Pseudomonadaceae; Cellvibrio. Cellvibrio japonicus Ueda107                                | 6.00E-82  | 86.61            |
| 296 | Bacteria; Proteobacteria; Alphaproteobacteria; Rhizobiales; Beijerinckiaceae; Methylocella. Methylocella silvestris BL2                                   | 2.00E-131 | 88.74            |
| 297 | Bacteria; Proteobacteria; Alphaproteobacteria; Rhizobiales; Rhizobiaceae; Sinorhizobium/Ensifer group; Sinorhizobium. Sinorhizobium fredii NGR234         | 1.00E-157 | 91.83            |
| 298 | Bacteria; Firmicutes; Clostridia; Clostridiales; Peptococcaceae; Thermincola. Thermincola potens JR                                                       | 1.00E-45  | 86.28            |
| 302 | Bacteria; Cyanobacteria; Prochlorales; Prochlorococcaceae; Prochlorococcus. Prochlorococcus marinus str. MIT 9202                                         | 5.00E-104 | 100              |
| 308 | Bacteria; Proteobacteria; Alphaproteobacteria; Rickettsiales; SAR11 cluster; Candidatus Pelagibacter. Candidatus Pelagibacter ubique HTCC1002             | 3.00E-127 | 92.29            |
| 316 | Bacteria; Proteobacteria; Gammaproteobacteria; Oceanospirillales; Alcanivoracaceae; Alcanivorax. Alcanivorax borkumensis SK2                              | 6.00E-85  | 86.93            |
| 317 | Bacteria; Proteobacteria; Alphaproteobacteria; SAR116 cluster; Candidatus Puniceispirillum. Candidatus Puniceispirillum marinum IMCC1322                  | 0         | 93.75            |
| 318 | Bacteria; Proteobacteria; Gammaproteobacteria; Pseudomonadales; Pseudomonadaceae; Cellvibrio. Cellvibrio japonicus Ueda107                                | 3.00E-77  | 86.74            |
| 324 | Bacteria; Proteobacteria; Deltaproteobacteria; Desulfuromonadales; Geobacteraceae; Geobacter. Geobacter sp. M18                                           | 7.00E-88  | 87.36            |
| 325 | Bacteria; Proteobacteria; Deltaproteobacteria; Desulfuromonadales; Geobacteraceae; Geobacter. Geobacter sp. FRC-32                                        | 6.00E-119 | 90.83            |
| 326 | Bacteria; Bacteroidetes; Flavobacteria; Flavobacteriales; Flavobacteriaceae; Polaribacter. Polaribacter irgensii 23-P                                     | 2.00E-106 | 88.59            |
| 327 | Bacteria; Proteobacteria; Alphaproteobacteria; Rickettsiales; SAR11 cluster; Candidatus Pelagibacter. Candidatus Pelagibacter sp. HTCC7211                | 2.00E-125 | 92.77            |
| 328 | Bacteria; Proteobacteria; Gammaproteobacteria; Pseudomonadales; Pseudomonadaceae; Pseudomonas. Pseudomonas fluorescens WH6                                | 1.00E-175 | 92.36            |
| 329 | Bacteria; Proteobacteria; Alphaproteobacteria; Rickettsiales; SAR11 cluster; Candidatus Pelagibacter. Candidatus Pelagibacter ubique HTCC1002             | 8.00E-112 | 90.54            |
| 332 | Bacteria; Actinobacteria; Actinobacteridae; Actinomycetales; Frankineae; Geodermatophilaceae; Geodermatophilus. Geodermatophilus obscurus DSM 43160       | 1.00E-175 | 91.32            |
| 333 | Bacteria; Proteobacteria; Gammaproteobacteria; Alteromonadales; Shewanellaceae; Shewanella. Shewanella sp. ANA-3                                          | 5.00E-70  | 85.42            |
| 335 | Bacteria; Proteobacteria; Alphaproteobacteria; Rickettsiales; SAR11 cluster; Candidatus Pelagibacter. Candidatus Pelagibacter ubique HTCC1002             | 2.00E-165 | 90.79            |
| 339 | Bacteria; Proteobacteria; Gammaproteobacteria; Alteromonadales; Colwelliaceae; Colwellia. Colwellia psychrerythraea 34H                                   | 0         | 95.51            |
| 340 | Bacteria; Proteobacteria; Deltaproteobacteria; Desulfuromonadales; Geobacteraceae; Geobacter. Geobacter sp. FRC-32                                        | 9.00E-87  | 87.32            |
| 341 | Bacteria; Verrucomicrobia; Opitutae; Puniceococcales; Puniceococcaceae; Coraliomargarita. Coraliomargarita akajimensis DSM 45221                          | 1.00E-107 | 89.43            |
| 343 | Bacteria; Proteobacteria; Alphaproteobacteria; SAR116 cluster; Candidatus Puniceispirillum. Candidatus Puniceispirillum marinum IMCC1322                  | 1.00E-101 | 88.79            |
| 347 | Bacteria; Proteobacteria; Alphaproteobacteria; Rickettsiales; SAR11 cluster; Candidatus Pelagibacter. Candidatus Pelagibacter ubique HTCC1062             | 0         | 95.44            |
| 348 | Bacteria; Proteobacteria; Deltaproteobacteria; Desulfovibrionales; Desulfovibrionaceae; Desulfovibrio. Desulfovibrio aespoeensis Aspo-2                   | 3.00E-81  | 86.97            |
| 352 | Bacteria; Proteobacteria; Alphaproteobacteria; Rickettsiales; SAR11 cluster; Candidatus Pelagibacter. Candidatus Pelagibacter ubique HTCC1062             | 0         | 95.07            |
| 355 | Bacteria; Proteobacteria; Alphaproteobacteria; Rickettsiales; Rickettsiaceae; Rickettsieae; Rickettsia; typhus group. Rickettsia prowazekii str. Madrid E | 8.00E-100 | 88.76            |
| 359 | Bacteria; Cyanobacteria; Prochlorales; Prochlorococcaceae; Prochlorococcus. Prochlorococcus marinus str. NATL2A                                           | 0         | 99.38            |
| 361 | Bacteria; Proteobacteria; Alphaproteobacteria; Rickettsiales; SAR11 cluster; Candidatus Pelagibacter. Candidatus Pelagibacter ubique HTCC1002             | 1.00E-160 | 95.97            |
| 364 | Bacteria; Proteobacteria; Deltaproteobacteria; Desulfuromonadales; Geobacteraceae; Geobacter. Geobacter sp. M18                                           | 2.00E-79  | 86.86            |
| 365 | Bacteria; Proteobacteria; Gammaproteobacteria; Alteromonadales; Pseudoalteromonadaceae; Pseudoalteromonas. Pseudoalteromonas sp. SM9913                   | 0         | 92.89            |
| 367 | Bacteria; Proteobacteria; Alphaproteobacteria; Rhizobiales; Bradyrhizobiaceae; Rhodopseudomonas. Rhodopseudomonas palustris BisB5                         | 4.00E-37  | 86.5             |
| 373 | Bacteria; Proteobacteria; Alphaproteobacteria; Rhizobiales; Brucellaceae; Brucella. Brucella abortus bv. 5 str. B3196                                     | 0         | 93.72            |
| 381 | Bacteria; Proteobacteria; Alphaproteobacteria; SAR116 cluster; Candidatus Puniceispirillum. Candidatus Puniceispirillum marinum IMCC1322                  | 4.00E-160 | 95.95            |
| 382 | Bacteria; Proteobacteria; Gammaproteobacteria; Methylococcales; Methylococcaceae; Methylococcus. Methylococcus capsulatus str. Bath                       | 2.00E-122 | 88.12            |
| 383 | Bacteria; Cyanobacteria; Prochlorales; Prochlorococcaceae; Prochlorococcus. Prochlorococcus marinus str. MIT 9202                                         | 0         | 96.77            |
| 384 | Bacteria; Cyanobacteria; Chroococcales; Synechococcus. Synechococcus sp. WH 5701                                                                          | 4.00E-150 | 93.77            |
| 386 | Bacteria; Proteobacteria; Gammaproteobacteria; Chromatiales; Halothiobacillaceae; Halothiobacillus. Halothiobacillus neapolitanus c2                      | 3.00E-87  | 87.5             |

| OTU | Phylogeny of best BLAST hit (refseq_genomic)                                                                                                   | e value   | percent identity |
|-----|------------------------------------------------------------------------------------------------------------------------------------------------|-----------|------------------|
| 388 | Bacteria; Proteobacteria; Alphaproteobacteria; Rhizobiales; Phyllobacteriaceae; Mesorhizobium. Mesorhizobium ciceri biovar biserrulae WSM1271  | 8.00E-180 | 92.32            |
| 389 | Bacteria; Bacteroidetes; Flavobacteria; Flavobacteriales; Flavobacteriaceae; Cellulophaga. Cellulophaga algicola DSM 14237                     | 3.00E-176 | 92.62            |
| 390 | Bacteria; Firmicutes; Bacillales; Bacillaceae; Bacillus. Bacillus licheniformis ATCC 14580                                                     | 2.00E-146 | 88.89            |
| 391 | Bacteria; Actinobacteria; Actinobacteridae; Actinomycetales; Pseudonocardineae; Amycolatopsis. Amycolatopsis mediterranei U32                  | 2.00E-127 | 92.31            |
| 393 | Bacteria; Proteobacteria; Alphaproteobacteria; SAR116 cluster; Candidatus Puniceispirillum. Candidatus Puniceispirillum marinum IMCC1322       | 5.00E-125 | 95.52            |
| 398 | Bacteria; Cyanobacteria; Prochlorales; Prochlorococcaceae; Prochlorococcus. Prochlorococcus marinus str. MIT 9202                              | 0         | 99.78            |
| 399 | Bacteria; Proteobacteria; Gammaproteobacteria; Chromatiales; Ectothiorhodospiraceae; Thioalkalivibrio. Thioalkalivibrio sulfidophilus HL-EbGr7 | 0         | 92.2             |
| 400 | Bacteria; Proteobacteria; Gammaproteobacteria; Alteromonadales; Shewanellaceae; Shewanella. Shewanella baltica OS223                           | 4.00E-86  | 86.86            |
| 402 | Bacteria; Proteobacteria; Gammaproteobacteria; Alteromonadales; Alteromonadaceae; Alteromonas. Alteromonas macleodii str. 'Deep ecotype'       | 0         | 94.67            |
| 403 | Bacteria; Proteobacteria; Alphaproteobacteria; Rhizobiales; Bradyrhizobiaceae; Rhodopseudomonas. Rhodopseudomonas palustris BisB5              | 6.00E-36  | 85.64            |
| 404 | Bacteria; Proteobacteria; Gammaproteobacteria; OMG group; SAR92 clade. gamma proteobacterium HTCC2207                                          | 0         | 95.43            |
| 408 | Bacteria; Actinobacteria; Actinobacteridae; Actinomycetales; Frankineae; Frankiaceae; Frankia. Frankia sp. Eu11c                               | 3.00E-93  | 88.29            |
| 413 | Bacteria; Chlamydiae; Chlamydiales; Parachlamydiaceae; Candidatus Protochlamydia. Candidatus Protochlamydia amoebophila UWE25                  | 1.00E-153 | 90.63            |
| 415 | Bacteria; Bacteroidetes; Flavobacteria; Flavobacteriales; Flavobacteriaceae; Flavobacterium. Flavobacterium psychrophilum JIP02/86             | 1.00E-166 | 96.32            |
| 426 | Bacteria; Verrucomicrobia; Opitutae; Puniceococcales; Puniceococcaceae; Coraliomargarita. Coraliomargarita akajimensis DSM 45221               | 0         | 95.23            |
| 428 | Bacteria; Proteobacteria; Alphaproteobacteria; Rhodobacterales; Rhodobacteraceae; Ruegeria. Silicibacter lacuscaerulensis ITI-1157             | 2.00E-131 | 91.13            |
| 430 | Bacteria; Cyanobacteria; Prochlorales; Prochlorococcaceae; Prochlorococcus. Prochlorococcus marinus str. NATL2A                                | 2.00E-100 | 91.18            |
| 432 | Bacteria; Cyanobacteria; Prochlorales; Prochlorococcaceae; Prochlorococcus. Prochlorococcus marinus str. MIT 9202                              | 0         | 97.67            |
| 433 | Bacteria; Firmicutes; Bacillales; Bacillaceae; Bacillus; Bacillus cereus group. Bacillus thuringiensis serovar tochiensis BGSC 4Y1             | 0         | 99.79            |
| 435 | Bacteria; Proteobacteria; Alphaproteobacteria; Rickettsiales; SAR11 cluster. alpha proteobacterium HIMB114                                     | 9.00E-93  | 88.07            |
| 440 | Bacteria; Proteobacteria; Gammaproteobacteria; Legionellales; Legionellaceae; Legionella. Legionella longbeachae NSW150                        | 5.00E-144 | 89.98            |
| 441 | Bacteria; Cyanobacteria; Prochlorales; Prochlorococcaceae; Prochlorococcus. Prochlorococcus marinus str. MIT 9202                              | 4.00E-175 | 97.15            |
| 447 | Bacteria; Proteobacteria; Deltaproteobacteria; Desulfuromonadales; Geobacteraceae; Geobacter. Geobacter uraniireducens Rf4                     | 2.00E-155 | 95.43            |
| 448 | Bacteria; Proteobacteria; Alphaproteobacteria; Rickettsiales; SAR11 cluster; Candidatus Pelagibacter. Candidatus Pelagibacter sp. HTCC7211     | 0         | 97.7             |
| 452 | Bacteria; Proteobacteria; Gammaproteobacteria; Chromatiales; Halothiobacillaceae; Halothiobacillus. Halothiobacillus neapolitanus c2           | 6.00E-54  | 89               |
| 458 | Bacteria; Proteobacteria; Gammaproteobacteria; OMG group; SAR92 clade. gamma proteobacterium HTCC2207                                          | 0         | 94.77            |
| 460 | Bacteria; Proteobacteria; Alphaproteobacteria; SAR116 cluster; Candidatus Puniceispirillum. Candidatus Puniceispirillum marinum IMCC1322       | 8.00E-180 | 91.86            |
| 461 | Bacteria; Proteobacteria; Alphaproteobacteria; Rhodobacterales; Rhodobacteraceae; Pelagibaca. Pelagibaca bermudensis HTCC2601                  | 0         | 95.37            |
| 462 | Bacteria; Proteobacteria; Alphaproteobacteria; Rickettsiales; SAR11 cluster; Candidatus Pelagibacter. Candidatus Pelagibacter ubique HTCC1062  | 0         | 94.25            |
| 466 | Bacteria; Firmicutes; Bacillales; Macrocooccus. Macrocooccus caseolyticus JCSC5402                                                             | 5.00E-58  | 84               |
| 470 | Bacteria; Proteobacteria; Alphaproteobacteria; Rhodobacterales; Hyphomonadaceae; Maricaulis. Maricaulis maris MCS10                            | 7.00E-94  | 88.82            |
| 471 | Bacteria; Proteobacteria; Gammaproteobacteria; Chromatiales; Halothiobacillaceae; Halothiobacillus. Halothiobacillus neapolitanus c2           | 2.00E-106 | 89.49            |
| 475 | Bacteria; Proteobacteria; Deltaproteobacteria; Desulfuromonadales; Geobacteraceae; Geobacter. Geobacter metallireducens GS-15                  | 3.00E-105 | 89.49            |
| 476 | Bacteria; Proteobacteria; Gammaproteobacteria; Pseudomonadales; Moraxellaceae; Moraxella. Moraxella catarrhalis RH4                            | 3.00E-99  | 85.45            |
| 477 | Bacteria; Proteobacteria; Gammaproteobacteria; Chromatiales; Halothiobacillaceae; Halothiobacillus. Halothiobacillus neapolitanus c2           | 4.00E-98  | 88.73            |
| 479 | Bacteria; Proteobacteria; Alphaproteobacteria; Rickettsiales; SAR11 cluster; Candidatus Pelagibacter. Candidatus Pelagibacter ubique HTCC1062  | 4.00E-157 | 97.54            |
| 480 | Bacteria; Proteobacteria; Deltaproteobacteria; Desulfovibrionales; Desulfovibrionaceae; Desulfovibrio. Desulfovibrio aespoensis Aspo-2         | 2.00E-63  | 84.66            |
| 481 | Bacteria; Proteobacteria; Alphaproteobacteria; Rickettsiales; SAR11 cluster. alpha proteobacterium HIMB114                                     | 0         | 92.87            |
| 489 | Bacteria; Proteobacteria; Alphaproteobacteria; Rickettsiales; SAR11 cluster; Candidatus Pelagibacter. Candidatus Pelagibacter ubique HTCC1062  | 0         | 93.02            |
| 493 | Bacteria; Proteobacteria; Alphaproteobacteria; Rhodobacterales; Rhodobacteraceae; Thalassobium. Thalassobium sp. R2A62                         | 0         | 96.92            |
| 494 | Bacteria; Proteobacteria; Alphaproteobacteria; Rickettsiales; SAR11 cluster; Candidatus Pelagibacter. Candidatus Pelagibacter sp. HTCC7211     | 2.00E-180 | 98.56            |
| 499 | Bacteria; Proteobacteria; Alphaproteobacteria; Rickettsiales; SAR11 cluster; Candidatus Pelagibacter. Candidatus Pelagibacter ubique HTCC1062  | 5.00E-175 | 91.17            |

| OTU | Phylogeny of best BLAST hit (refseq_genomic)                                                                                                                                       | e value   | percent identity |
|-----|------------------------------------------------------------------------------------------------------------------------------------------------------------------------------------|-----------|------------------|
| 508 | Bacteria; Proteobacteria; Deltaproteobacteria; Desulfuromonadales; Geobacteraceae; Geobacter. <i>Geobacter metallireducens</i> GS-15                                               | 3.00E-114 | 90.52            |
| 513 | Bacteria; Proteobacteria; Deltaproteobacteria; Desulfobacterales; Desulfobulbaceae; Desulfobulbus. <i>Desulfobulbus propionicus</i> DSM 2032                                       | 1.00E-88  | 88.95            |
| 514 | Bacteria; Proteobacteria; Deltaproteobacteria; Desulfovibrionales; Desulfomicrobiaceae; Desulfomicrobium. <i>Desulfomicrobium baculatum</i> DSM 4028                               | 6.00E-79  | 86               |
| 516 | Bacteria; Cyanobacteria; Acaryochloris. <i>Acaryochloris marina</i> MBIC11017                                                                                                      | 7.00E-162 | 90.99            |
| 521 | Bacteria; Proteobacteria; Gammaproteobacteria; Oceanospirillales; Alcanivoracaceae; Alcanivorax. <i>Alcanivorax borkumensis</i> SK2                                                | 1.00E-83  | 86.57            |
| 522 | Bacteria; Cyanobacteria; Prochlorales; Prochlorococcaceae; Prochlorococcus. <i>Prochlorococcus marinus</i> str. MIT 9202                                                           | 9.00E-167 | 99.68            |
| 525 | Bacteria; Proteobacteria; Alphaproteobacteria; Rickettsiales; SAR11 cluster; Candidatus Pelagibacter. <i>Candidatus Pelagibacter ubique</i> HTCC1062                               | 0         | 92.47            |
| 527 | Bacteria; Proteobacteria; Alphaproteobacteria; Rhizobiales; Aurantimonadaceae; Aurantimonas. <i>Aurantimonas manganooxydans</i> SI85-9A1                                           | 0         | 95.87            |
| 529 | Bacteria; Proteobacteria; Gammaproteobacteria; Legionellales; Coxiellaceae; Coxiella. <i>Coxiella burnetii</i> CbuK_Q154                                                           | 1.00E-160 | 90.35            |
| 532 | Bacteria; Cyanobacteria; Prochlorales; Prochlorococcaceae; Prochlorococcus. <i>Prochlorococcus marinus</i> str. MIT 9202                                                           | 0         | 100              |
| 533 | Bacteria; Verrucomicrobia; Opitutae; Puniceococcales; Puniceococcaceae; Coraliomargarita. <i>Coraliomargarita akajimensis</i> DSM 45221                                            | 0         | 95.5             |
| 534 | Bacteria; Firmicutes; Bacillales; Macroccoccus. <i>Macroccoccus caseolyticus</i> JCSC5402                                                                                          | 1.00E-55  | 84               |
| 535 | Bacteria; Proteobacteria; Alphaproteobacteria; Rickettsiales; SAR11 cluster; Candidatus Pelagibacter. <i>Candidatus Pelagibacter ubique</i> HTCC1062                               | 2.00E-159 | 90.42            |
| 537 | Bacteria; Proteobacteria; Gammaproteobacteria; Alteromonadales; Alteromonadaceae; Marinobacter. <i>Marinobacter aquaeolei</i> VT8                                                  | 0         | 94.24            |
| 538 | Bacteria; Proteobacteria; Alphaproteobacteria; Rickettsiales; SAR11 cluster; Candidatus Pelagibacter. <i>Candidatus Pelagibacter</i> sp. HTCC7211                                  | 0         | 94.2             |
| 542 | Bacteria; Cyanobacteria; Prochlorales; Prochlorococcaceae; Prochlorococcus. <i>Prochlorococcus marinus</i> str. MIT 9515                                                           | 2.00E-167 | 97.57            |
| 544 | Bacteria; Proteobacteria; Gammaproteobacteria; Pseudomonadales; Pseudomonadaceae; Pseudomonas. <i>Pseudomonas fluorescens</i> WH6                                                  | 0         | 93.21            |
| 549 | Bacteria; Proteobacteria; Alphaproteobacteria; Sphingomonadales; Sphingomonadaceae; Zymomonas. <i>Zymomonas mobilis</i> subsp. <i>mobilis</i> ZM4                                  | 8.00E-140 | 89.54            |
| 550 | Bacteria; Proteobacteria; Gammaproteobacteria; Chromatiales; Ectothiorhodospiraceae; Thioalkalivibrio. <i>Thioalkalivibrio sulfidophilus</i> HL-EbGr7                              | 0         | 93.62            |
| 551 | Bacteria; Proteobacteria; Gammaproteobacteria; Pseudomonadales; Pseudomonadaceae; Cellvibrio. <i>Cellvibrio japonicus</i> Ueda107                                                  | 9.00E-152 | 89.83            |
| 553 | Bacteria; Proteobacteria; Alphaproteobacteria; Rickettsiales; SAR11 cluster; Candidatus Pelagibacter. <i>Candidatus Pelagibacter ubique</i> HTCC1062                               | 0         | 93.44            |
| 555 | Bacteria; Proteobacteria; Deltaproteobacteria; Desulfuromonadales; Pelobacteraceae; Pelobacter. <i>Pelobacter carbinolicus</i> DSM 2380                                            | 1.00E-120 | 91.09            |
| 556 | Bacteria; Cyanobacteria; Prochlorales; Prochlorococcaceae; Prochlorococcus. <i>Prochlorococcus marinus</i> str. MIT 9202                                                           | 1.00E-98  | 99.49            |
| 557 | Bacteria; Proteobacteria; Deltaproteobacteria; Myxococcales; Cystobacterineae; Myxococcaceae; Anaeromyxobacter. <i>Anaeromyxobacter dehalogenans</i> 2CP-1                         | 7.00E-94  | 88.76            |
| 559 | Bacteria; Cyanobacteria; Prochlorales; Prochlorococcaceae; Prochlorococcus. <i>Prochlorococcus marinus</i> str. MIT 9202                                                           | 0         | 98.15            |
| 568 | Bacteria; Proteobacteria; Alphaproteobacteria; Rickettsiales; Anaplasmataceae; Wolbachieae; Wolbachia. <i>Wolbachia endosymbiont of Drosophila willistoni</i><br>TSC#14030-0811.24 | 2.00E-102 | 89.8             |
| 570 | Bacteria; Proteobacteria; Alphaproteobacteria; Rickettsiales; SAR11 cluster; Candidatus Pelagibacter. <i>Candidatus Pelagibacter</i> sp. HTCC7211                                  | 5.00E-135 | 89.29            |
| 571 | Bacteria; Cyanobacteria; Prochlorales; Prochlorococcaceae; Prochlorococcus. <i>Prochlorococcus marinus</i> str. MIT 9211                                                           | 0         | 98.46            |
| 572 | Bacteria; Proteobacteria; Alphaproteobacteria; Rickettsiales; SAR11 cluster; Candidatus Pelagibacter. <i>Candidatus Pelagibacter ubique</i> HTCC1062                               | 4.00E-154 | 90.21            |
| 576 | Bacteria; Proteobacteria; Deltaproteobacteria; Syntrophobacterales; Syntrophaceae; Syntrophus. <i>Syntrophus aciditrophicus</i> SB                                                 | 2.00E-162 | 90.33            |
| 581 | Bacteria; Proteobacteria; Deltaproteobacteria; Desulfovibrionales; Desulfomicrobiaceae; Desulfomicrobium. <i>Desulfomicrobium baculatum</i> DSM 4028                               | 4.00E-86  | 86.86            |
| 582 | Bacteria; Proteobacteria; Gammaproteobacteria; Chromatiales; Halothiobacillaceae; Halothiobacillus. <i>Halothiobacillus neapolitanus</i> c2                                        | 2.00E-122 | 87.68            |
| 589 | Bacteria; Cyanobacteria; Prochlorales; Prochlorococcaceae; Prochlorococcus. <i>Prochlorococcus marinus</i> str. NATL2A                                                             | 0         | 98.9             |
| 592 | Bacteria; Bacteroidetes; Flavobacteria; Flavobacteriales; Flavobacteriaceae; Polaribacter. <i>Polaribacter</i> sp. MED152                                                          | 0         | 94.12            |
| 601 | Bacteria; Proteobacteria; Gammaproteobacteria; Chromatiales; Halothiobacillaceae; Halothiobacillus. <i>Halothiobacillus neapolitanus</i> c2                                        | 1.00E-98  | 88.89            |
| 609 | Bacteria; Chlamydiae; Chlamydiales; Chlamydiaceae; Chlamydomphila. <i>Chlamydomphila abortus</i> S26/3                                                                             | 2.00E-81  | 86.59            |
| 611 | Bacteria; Proteobacteria; Alphaproteobacteria; Rhizobiales; Phyllobacteriaceae; Mesorhizobium. <i>Mesorhizobium ciceri</i> biovar <i>biserrulae</i> WSM1271                        | 1.00E-169 | 92.21            |
| 612 | Bacteria; Proteobacteria; Alphaproteobacteria; Rickettsiales; SAR11 cluster; Candidatus Pelagibacter. <i>Candidatus Pelagibacter ubique</i> HTCC1002                               | 5.00E-116 | 91.11            |
| 614 | Bacteria; Proteobacteria; Alphaproteobacteria; Rhodobacterales; Rhodobacteraceae; Roseibium. <i>Roseibium</i> sp. TrichSKD4                                                        | 0         | 97.08            |
| 617 | Bacteria; Proteobacteria; Alphaproteobacteria; SAR116 cluster; Candidatus Puniceispirillum. <i>Candidatus Puniceispirillum marinum</i> IMCC1322                                    | 0         | 95.45            |
| 621 | Bacteria; Bacteroidetes; Sphingobacteria; Sphingobacteriales; Chitinophagaceae; Chitinophaga. <i>Chitinophaga pinensis</i> DSM 2588                                                | 1.00E-129 | 92.11            |

| OTU | Phylogeny of best BLAST hit (refseq_genomic)                                                                                                                    | e value   | percent identity |
|-----|-----------------------------------------------------------------------------------------------------------------------------------------------------------------|-----------|------------------|
| 624 | Bacteria; Bacteroidetes; Sphingobacteria; Sphingobacteriales; Sphingobacteriaceae; Sphingobacterium. Sphingobacterium spiritivorum ATCC 33300                   | 2.00E-124 | 88.53            |
| 629 | Bacteria; Proteobacteria; Alphaproteobacteria; Rhodobacterales; Rhodobacteraceae. Rhodobacteraceae bacterium KLH11                                              | 1.00E-160 | 97.55            |
| 635 | Bacteria; Proteobacteria; Gammaproteobacteria; Chromatiales; Halothiobacillaceae; Halothiobacillus. Halothiobacillus neapolitanus c2                            | 2.00E-91  | 88.03            |
| 637 | Bacteria; Proteobacteria; Alphaproteobacteria; Rickettsiales; SAR11 cluster; Candidatus Pelagibacter. Candidatus Pelagibacter ubique HTCC1062                   | 0         | 94.66            |
| 640 | Bacteria; Cyanobacteria; Prochlorales; Prochlorococcaceae; Prochlorococcus. Prochlorococcus marinus str. MIT 9202                                               | 4.00E-101 | 99.5             |
| 642 | Bacteria; Proteobacteria; Gammaproteobacteria; Legionellales; Coxiellaceae; Coxiella. Coxiella burnetii CbuK_Q154                                               | 0         | 93.22            |
| 644 | Bacteria; Proteobacteria; Alphaproteobacteria; Rickettsiales; SAR11 cluster; Candidatus Pelagibacter. Candidatus Pelagibacter ubique HTCC1062                   | 5.00E-156 | 94.04            |
| 651 | Bacteria; Proteobacteria; Gammaproteobacteria; Chromatiales; Ectothiorhodospiraceae; Thioalkalivibrio. Thioalkalivibrio sulfidophilus HL-EbGr7                  | 0         | 93.21            |
| 656 | Bacteria; Proteobacteria; Alphaproteobacteria; Rickettsiales; SAR11 cluster; Candidatus Pelagibacter. Candidatus Pelagibacter ubique HTCC1062                   | 0         | 95.6             |
| 660 | Bacteria; Cyanobacteria; Prochlorales; Prochlorococcaceae; Prochlorococcus. Prochlorococcus marinus str. NATL2A                                                 | 0         | 98.86            |
| 661 | Bacteria; Proteobacteria; Alphaproteobacteria; Rhodobacterales; Rhodobacteraceae; Ruegeria. Silicibacter sp. TrichCH4B                                          | 0         | 99.78            |
| 668 | Bacteria; Proteobacteria; Alphaproteobacteria; Rhizobiales; Phyllobacteriaceae; Mesorhizobium. Mesorhizobium loti MAFF303099                                    | 0         | 94.4             |
| 669 | Bacteria; Thermobaculum. Thermobaculum terrenum ATCC BAA-798                                                                                                    | 1.00E-46  | 86.82            |
| 670 | Bacteria; Proteobacteria; Betaproteobacteria; Burkholderiales; Comamonadaceae; Comamonas. Comamonas testosteroni CNB-2                                          | 3.00E-148 | 90.67            |
| 671 | Bacteria; Proteobacteria; Alphaproteobacteria; Sphingomonadales; Sphingomonadaceae; Sphingomonas. Sphingomonas sp. SKA58                                        | 0         | 98.97            |
| 672 | Bacteria; Proteobacteria; Gammaproteobacteria; Oceanospirillales; Hahellaceae; Hahella. Hahella chejuensis KCTC 2396                                            | 3.00E-105 | 89.71            |
| 674 | Bacteria; Proteobacteria; Deltaproteobacteria; Desulfuromonadales; Geobacteraceae; Geobacter. Geobacter sp. FRC-32                                              | 3.00E-120 | 92.02            |
| 677 | Bacteria; Cyanobacteria; Prochlorales; Prochlorococcaceae; Prochlorococcus. Prochlorococcus marinus str. NATL2A                                                 | 8.00E-106 | 97.72            |
| 687 | Bacteria; Proteobacteria; Deltaproteobacteria; Desulfovibrionales; Desulfomicrobiaceae; Desulfomicrobium. Desulfomicrobium baculatum DSM 4028                   | 3.00E-81  | 86.57            |
| 688 | Bacteria; Proteobacteria; Alphaproteobacteria; Rickettsiales; SAR11 cluster; Candidatus Pelagibacter. Candidatus Pelagibacter sp. HTCC7211                      | 0         | 94.48            |
| 694 | Bacteria; Proteobacteria; Gammaproteobacteria; Chromatiales; Ectothiorhodospiraceae; Nitrococcus. Nitrococcus mobilis Nb-231                                    | 6.00E-106 | 90.67            |
| 697 | Bacteria; Cyanobacteria; Prochlorales; Prochlorococcaceae; Prochlorococcus. Prochlorococcus marinus str. MIT 9202                                               | 3.00E-142 | 98.26            |
| 699 | Bacteria; Proteobacteria; Gammaproteobacteria; Oceanospirillales; Alcanivoracaceae; Alcanivorax. Alcanivorax borkumensis SK2                                    | 0         | 93.36            |
| 702 | Bacteria; Proteobacteria; Alphaproteobacteria; Sphingomonadales; Sphingomonadaceae; Sphingopyxis. Sphingopyxis alaskensis RB2256                                | 4.00E-111 | 90.59            |
| 705 | Bacteria; Cyanobacteria; Prochlorales; Prochlorococcaceae; Prochlorococcus. Prochlorococcus marinus str. NATL2A                                                 | 0         | 98.89            |
| 706 | Bacteria; Firmicutes; Lactobacillales; Lactobacillaceae; Lactobacillus. Lactobacillus salivarius UCC118                                                         | 9.00E-112 | 86.44            |
| 708 | Bacteria; Proteobacteria; Gammaproteobacteria; Vibrionales; Vibrionaceae; Vibrio. Vibrio sp. Ex25                                                               | 5.00E-110 | 90.37            |
| 711 | Bacteria; Cyanobacteria; Chroococcales; Synechococcus. Synechococcus sp. WH 5701                                                                                | 1.00E-172 | 91.15            |
| 712 | Bacteria; Proteobacteria; Alphaproteobacteria; Rickettsiales; SAR11 cluster; Candidatus Pelagibacter. Candidatus Pelagibacter sp. HTCC7211                      | 3.00E-148 | 90.26            |
| 715 | Bacteria; Proteobacteria; Alphaproteobacteria; Rhodobacterales; Rhodobacteraceae; Thalassobium. Thalassobium sp. R2A62                                          | 0         | 94.05            |
| 724 | Bacteria; Proteobacteria; Deltaproteobacteria; Desulfuromonadales; Pelobacteraceae; Pelobacter. Pelobacter carbinolicus DSM 2380                                | 4.00E-89  | 87.71            |
| 725 | Bacteria; Cyanobacteria; Prochlorales; Prochlorococcaceae; Prochlorococcus. Prochlorococcus marinus str. MIT 9515                                               | 0         | 98.89            |
| 726 | Bacteria; Cyanobacteria; Prochlorales; Prochlorococcaceae; Prochlorococcus. Prochlorococcus marinus str. MIT 9202                                               | 7.00E-96  | 93.87            |
| 727 | Bacteria; Proteobacteria; Gammaproteobacteria; Pseudomonadales; Pseudomonadaceae; Pseudomonas; Pseudomonas amygdali. Pseudomonas syringae pv. aesculi str. 2250 | 2.00E-81  | 86.29            |
| 729 | Bacteria; Proteobacteria; Gammaproteobacteria; Chromatiales; Halothiobacillaceae; Halothiobacillus. Halothiobacillus neapolitanus c2                            | 4.00E-166 | 91.21            |
| 730 | Bacteria; Bacteroidetes; Flavobacteria; Flavobacteriales; Flavobacteriaceae; Flavobacterium. Flavobacterium johnsoniae UW101                                    | 2.00E-125 | 87.83            |
| 731 | Bacteria; Proteobacteria; Gammaproteobacteria; Alteromonadales; Shewanellaceae; Shewanella. Shewanella baltica OS223                                            | 2.00E-146 | 89.54            |
| 734 | Bacteria; Bacteroidetes; Flavobacteria; Flavobacteriales; Flavobacteriaceae; Leeuwenhoekiella. Leeuwenhoekiella blandensis MED217                               | 5.00E-110 | 86.56            |
| 736 | Bacteria; Proteobacteria; Alphaproteobacteria; Rickettsiales; SAR11 cluster; Candidatus Pelagibacter. Candidatus Pelagibacter ubique HTCC1002                   | 0         | 92.26            |
| 737 | Bacteria; Proteobacteria; Deltaproteobacteria; Desulfovibrionales; Desulfovibrionaceae; Desulfovibrio. Desulfovibrio aespoensis Aspo-2                          | 2.00E-75  | 86.04            |
| 738 | Bacteria; Proteobacteria; Alphaproteobacteria; Rickettsiales; SAR11 cluster; Candidatus Pelagibacter. Candidatus Pelagibacter ubique HTCC1062                   | 4.00E-169 | 95.17            |

| OTU | Phylogeny of best BLAST hit (refseq_genomic)                                                                                                                                | e value   | percent identity |
|-----|-----------------------------------------------------------------------------------------------------------------------------------------------------------------------------|-----------|------------------|
| 742 | Bacteria; Cyanobacteria; Prochlorales; Prochlorococcaceae; Prochlorococcus. Prochlorococcus marinus str. MIT 9202                                                           | 0         | 98.97            |
| 743 | Bacteria; Proteobacteria; Gammaproteobacteria; Methylococcales; Methylococcaceae; Methylococcus. Methylococcus capsulatus str. Bath                                         | 5.00E-138 | 88.79            |
| 744 | Bacteria; Proteobacteria; Zetaproteobacteria; Mariprofundales; Mariprofundaceae; Mariprofundus. Mariprofundus ferrooxydans PV-1                                             | 1.00E-116 | 91.19            |
| 750 | Bacteria; Proteobacteria; Gammaproteobacteria; Xanthomonadales; Xanthomonadaceae; Stenotrophomonas; Stenotrophomonas maltophilia group. Stenotrophomonas maltophilia R551-3 | 2.00E-45  | 82.15            |
| 752 | Bacteria; Cyanobacteria; Prochlorales; Prochlorococcaceae; Prochlorococcus. Prochlorococcus marinus str. MIT 9202                                                           | 0         | 99.43            |
| 759 | Bacteria; Proteobacteria; Alphaproteobacteria; Rickettsiales; SAR11 cluster. alpha proteobacterium HIMB114                                                                  | 8.00E-143 | 89.02            |
| 763 | Bacteria; Proteobacteria; Gammaproteobacteria; Oceanospirillales; Alcanivoracaceae; Alcanivorax. Alcanivorax borkumensis SK2                                                | 1.00E-160 | 91.07            |
| 766 | Bacteria; Proteobacteria; Deltaproteobacteria; Desulfobacterales; Desulfobulbaceae; Desulfobulbus. Desulfobulbus propionicus DSM 2032                                       | 3.00E-117 | 90.57            |
| 768 | Bacteria; Proteobacteria; Alphaproteobacteria; Rhodospirillales; Rhodospirillaceae; Magnetospirillum. Magnetospirillum magneticum AMB-1                                     | 6.00E-131 | 92.33            |
| 769 | Bacteria; Proteobacteria; Alphaproteobacteria; Rhodobacterales; Rhodobacteraceae; Oceanicola. Oceanicola batsensis HTCC2597                                                 | 0         | 97.38            |
| 772 | Bacteria; Proteobacteria; Alphaproteobacteria; Rhizobiales; Xanthobacteraceae; Xanthobacter. Xanthobacter autotrophicus Py2                                                 | 8.00E-130 | 93.35            |
| 774 | Bacteria; Proteobacteria; Alphaproteobacteria; Rhodobacterales; Rhodobacteraceae; Thalassobium. Thalassobium sp. R2A62                                                      | 0         | 96.04            |
| 777 | Bacteria; Proteobacteria; Deltaproteobacteria; Desulfobacterales; Desulfobacteraceae; Desulfococcus. Desulfococcus oleovorans Hxd3                                          | 1.00E-138 | 88.27            |
| 784 | Bacteria; Proteobacteria; Gammaproteobacteria; Chromatiales; Ectothiorhodospiraceae; Nitrococcus. Nitrococcus mobilis Nb-231                                                | 4.00E-120 | 91.22            |
| 785 | Bacteria; Cyanobacteria; Prochlorales; Prochlorococcaceae; Prochlorococcus. Prochlorococcus marinus str. MIT 9202                                                           | 3.00E-163 | 97.49            |
| 787 | Bacteria; Cyanobacteria; Prochlorales; Prochlorococcaceae; Prochlorococcus. Prochlorococcus marinus str. MIT 9202                                                           | 0         | 100              |
| 796 | Bacteria; Cyanobacteria; Prochlorales; Prochlorococcaceae; Prochlorococcus. Prochlorococcus marinus str. MIT 9202                                                           | 9.00E-167 | 98.24            |
| 799 | Bacteria; Proteobacteria; Deltaproteobacteria; Desulfuromonadales; Geobacteraceae; Geobacter. Geobacter lovleyi SZ                                                          | 3.00E-111 | 90.31            |
| 800 | Bacteria; Proteobacteria; Deltaproteobacteria; Desulfovibrionales; Desulfovibrionaceae; Desulfovibrio. Desulfovibrio aespoensis Aspo-2                                      | 2.00E-69  | 84.86            |
| 805 | Bacteria; Cyanobacteria; Chroococcales; Synechococcus. Synechococcus sp. RS9917                                                                                             | 1.00E-154 | 96.1             |
| 806 | Bacteria; Proteobacteria; Deltaproteobacteria; Desulfuromonadales; Geobacteraceae; Geobacter. Geobacter sp. FRC-32                                                          | 1.00E-107 | 89.6             |
| 808 | Bacteria; Proteobacteria; Gammaproteobacteria; Chromatiales; Ectothiorhodospiraceae; Thioalkalivibrio. Thioalkalivibrio sulfidophilus HL-EbGr7                              | 3.00E-124 | 88.17            |
| 812 | Bacteria; Proteobacteria; Gammaproteobacteria; Pseudomonadales; Pseudomonadaceae; Pseudomonas; Pseudomonas savastanoi. Pseudomonas savastanoi pv. savastanoi NCPPB 3335     | 2.00E-57  | 83.71            |
| 813 | Bacteria; Proteobacteria; Gammaproteobacteria; Chromatiales; Halothiobacillaceae; Halothiobacillus. Halothiobacillus neapolitanus c2                                        | 2.00E-103 | 89.17            |
| 815 | Bacteria; Proteobacteria; Gammaproteobacteria; Chromatiales; Halothiobacillaceae; Halothiobacillus. Halothiobacillus neapolitanus c2                                        | 1.00E-110 | 86.7             |
| 817 | Bacteria; Proteobacteria; Alphaproteobacteria; Rhizobiales; Bartonellaceae; Bartonella. Bartonella quintana str. Toulouse                                                   | 5.00E-144 | 89.47            |
| 819 | Bacteria; Proteobacteria; Alphaproteobacteria; Rhizobiales; Bartonellaceae; Bartonella. Bartonella clarridgeiae 73                                                          | 2.00E-115 | 91.14            |
| 820 | Bacteria; Proteobacteria; Gammaproteobacteria; Legionellales; Coxiellaceae; Coxiella. Coxiella burnetii CbuK_Q154                                                           | 9.00E-158 | 94.59            |
| 821 | Bacteria; Bacteroidetes; Flavobacteria; Flavobacteriales; Flavobacteriaceae; Dokdonia. Dokdonia donghaensis MED134                                                          | 0         | 94.13            |
| 822 | Bacteria; Bacteroidetes; Flavobacteria; Flavobacteriales; Flavobacteriaceae; Polaribacter. Polaribacter sp. MED152                                                          | 5.00E-135 | 88.02            |
| 823 | Bacteria; Proteobacteria; Alphaproteobacteria; Rhizobiales; Brucellaceae; Brucella. Brucella abortus bv. 5 str. B3196                                                       | 1.00E-175 | 91.8             |
| 824 | Bacteria; Proteobacteria; Gammaproteobacteria; Xanthomonadales; Xanthomonadaceae; Xanthomonas. Xanthomonas oryzae pv. oryzae PXO99A                                         | 1.00E-86  | 87.18            |
| 839 | Bacteria; Proteobacteria; Alphaproteobacteria; Rickettsiales; SAR11 cluster; Candidatus Pelagibacter. Candidatus Pelagibacter ubique HTCC1062                               | 4.00E-169 | 94.48            |
| 841 | Bacteria; Proteobacteria; Deltaproteobacteria; Desulfobacterales; Desulfobulbaceae; Desulfobulbus. Desulfobulbus propionicus DSM 2032                                       | 3.00E-102 | 89.53            |
| 845 | Bacteria; Cyanobacteria; Chroococcales; Synechococcus. Synechococcus sp. WH 7805                                                                                            | 6.00E-174 | 98.28            |
| 846 | Bacteria; Proteobacteria; Deltaproteobacteria; Desulfovibrionales; Desulfomicrobiaceae; Desulfomicrobium. Desulfomicrobium baculatum DSM 4028                               | 2.00E-81  | 86.57            |
| 847 | Bacteria; Chloroflexi; Dehalococcoidetes; Dehalogenimonas. Dehalogenimonas lykanthroporepellens BL-DC-9                                                                     | 5.00E-73  | 87.08            |
| 852 | Bacteria; Proteobacteria; Gammaproteobacteria; Chromatiales; Halothiobacillaceae; Halothiobacillus. Halothiobacillus neapolitanus c2                                        | 1.00E-79  | 87.61            |
| 853 | Bacteria; Proteobacteria; Gammaproteobacteria; Vibrionales; Vibrionaceae; Vibrio. Vibrio harveyi HY01                                                                       | 0         | 100              |
| 854 | Bacteria; Proteobacteria; Deltaproteobacteria; Desulfovibrionales; Desulfovibrionaceae; Desulfovibrio. Desulfovibrio aespoensis Aspo-2                                      | 4.00E-86  | 86.86            |

| OTU | Phylogeny of best BLAST hit (refseq_genomic)                                                                                                      | e value   | percent identity |
|-----|---------------------------------------------------------------------------------------------------------------------------------------------------|-----------|------------------|
| 856 | Bacteria; Cyanobacteria; Prochlorales; Prochlorococcaceae; Prochlorococcus. Prochlorococcus marinus str. MIT 9202                                 | 6.00E-147 | 94.25            |
| 857 | Bacteria; Actinobacteria; Actinobacteridae; Actinomycetales; Frankineae; Frankiaceae; Frankia. Frankia sp. EAN1pec                                | 7.00E-171 | 91.12            |
| 858 | Bacteria; Proteobacteria; Alphaproteobacteria; Rickettsiales; SAR11 cluster; Candidatus Pelagibacter. Candidatus Pelagibacter ubique HTCC1002     | 2.00E-125 | 91.57            |
| 863 | Bacteria; Proteobacteria; Deltaproteobacteria; Desulfuromonadales; Geobacteraceae; Geobacter. Geobacter sp. M21                                   | 4.00E-89  | 87.71            |
| 867 | Bacteria; Proteobacteria; Deltaproteobacteria; Desulfuromonadales; Geobacteraceae; Geobacter. Geobacter sp. M21                                   | 8.00E-103 | 89.71            |
| 870 | Bacteria; Cyanobacteria; Prochlorales; Prochlorococcaceae; Prochlorococcus. Prochlorococcus marinus str. MIT 9202                                 | 1.00E-107 | 90.69            |
| 871 | Bacteria; Cyanobacteria; Chroococcales; Synechococcus. Synechococcus sp. RS9916                                                                   | 0         | 98.26            |
| 876 | Bacteria; Cyanobacteria; Prochlorales; Prochlorococcaceae; Prochlorococcus. Prochlorococcus marinus str. MIT 9202                                 | 0         | 100              |
| 878 | Bacteria; Proteobacteria; Gammaproteobacteria; Oceanospirillales; Alcanivoracaceae; Alcanivorax. Alcanivorax borkumensis SK2                      | 2.00E-128 | 87.53            |
| 880 | Bacteria; Proteobacteria; Gammaproteobacteria; Methylococcales; Methylococcaceae; Methylococcus. Methylococcus capsulatus str. Bath               | 7.00E-60  | 85.22            |
| 882 | Bacteria; Proteobacteria; Alphaproteobacteria; Rhodobacterales; Rhodobacteraceae; Labrenzia. Labrenzia alexandrii DFL-11                          | 3.00E-136 | 93.43            |
| 887 | Bacteria; Proteobacteria; Alphaproteobacteria; Rickettsiales; SAR11 cluster; Candidatus Pelagibacter. Candidatus Pelagibacter ubique HTCC1062     | 1.00E-175 | 92.39            |
| 888 | Bacteria; Deinococcus-Thermus; Deinococci; Deinococcales; Trueperaceae; Truepera. Truepera radiovictrix DSM 17093                                 | 4.00E-92  | 87.78            |
| 893 | Bacteria; Proteobacteria; Alphaproteobacteria; Rickettsiales; SAR11 cluster; Candidatus Pelagibacter. Candidatus Pelagibacter ubique HTCC1002     | 1.00E-117 | 90.78            |
| 896 | Bacteria; Proteobacteria; Alphaproteobacteria; Sphingomonadales; Sphingomonadaceae; Novosphingobium. Novosphingobium aromaticivorans DSM 12444    | 2.00E-88  | 84.65            |
| 898 | Bacteria; Proteobacteria; Gammaproteobacteria; Pseudomonadales; Pseudomonadaceae; Azotobacter. Azotobacter vinelandii DJ                          | 8.00E-180 | 92.59            |
| 900 | Bacteria; Proteobacteria; Deltaproteobacteria; Desulfuromonadales; Geobacteraceae; Geobacter. Geobacter sp. M21                                   | 5.00E-98  | 88.44            |
| 904 | Bacteria; Proteobacteria; Alphaproteobacteria; Rickettsiales; SAR11 cluster; Candidatus Pelagibacter. Candidatus Pelagibacter ubique HTCC1002     | 4.00E-160 | 95.71            |
| 906 | Bacteria; Proteobacteria; Deltaproteobacteria; Desulfuromonadales; Pelobacteraceae; Pelobacter. Pelobacter carbinolicus DSM 2380                  | 2.00E-112 | 90.35            |
| 909 | Bacteria; Proteobacteria; Deltaproteobacteria; Desulfuromonadales; Geobacteraceae; Geobacter. Geobacter sulfurireducens PCA                       | 2.00E-152 | 91.45            |
| 911 | Bacteria; Cyanobacteria; Prochlorales; Prochlorococcaceae; Prochlorococcus. Prochlorococcus marinus str. MIT 9202                                 | 3.00E-151 | 95.74            |
| 913 | Bacteria; Proteobacteria; Alphaproteobacteria; Rhizobiales; Rhizobiaceae; Sinorhizobium/Ensifer group; Sinorhizobium. Sinorhizobium meliloti 1021 | 2.00E-171 | 91.97            |
| 914 | Bacteria; Proteobacteria; Gammaproteobacteria; Alteromonadales; Pseudoalteromonadaceae; Pseudoalteromonas. Pseudoalteromonas haloplanktis TAC125  | 4.00E-166 | 91.19            |
| 915 | Bacteria; Bacteroidetes; Sphingobacteria; Sphingobacteriales; Sphingobacteriaceae; Sphingobacterium. Sphingobacterium spiritivorum ATCC 33300     | 3.00E-90  | 87.39            |
| 924 | Bacteria; Proteobacteria; Gammaproteobacteria; Pasteurellales; Pasteurellaceae; Aggregatibacter. Aggregatibacter aphrophilus NJ8700               | 6.00E-153 | 89.71            |
| 932 | Bacteria; Bacteroidetes; Flavobacteria; Flavobacteriales; Flavobacteriaceae; Riemerella. Riemerella anatipestifer DSM 15868                       | 1.00E-113 | 90.23            |
| 933 | Bacteria; Cyanobacteria; Prochlorales; Prochlorococcaceae; Prochlorococcus. Prochlorococcus marinus str. MIT 9202                                 | 3.00E-176 | 98.1             |
| 934 | Bacteria; Proteobacteria; Alphaproteobacteria; SAR116 cluster; Candidatus Puniceispirillum. Candidatus Puniceispirillum marinum IMCC1322          | 0         | 96.31            |
| 935 | Bacteria; Proteobacteria; Alphaproteobacteria; Rhizobiales; Phyllobacteriaceae; Mesorhizobium. Mesorhizobium ciceri biovar biserrulae WSM1271     | 7.00E-128 | 88.48            |
| 937 | Bacteria; Proteobacteria; Alphaproteobacteria; Rhizobiales; Phyllobacteriaceae; Mesorhizobium. Mesorhizobium ciceri biovar biserrulae WSM1271     | 7.00E-168 | 91.99            |
| 938 | Bacteria; Proteobacteria; Alphaproteobacteria; Rickettsiales; SAR11 cluster; Candidatus Pelagibacter. Candidatus Pelagibacter sp. HTCC7211        | 2.00E-75  | 89.68            |
| 942 | Bacteria; Proteobacteria; Alphaproteobacteria; Rickettsiales; Anaplasmataceae; Wolbachieae; Wolbachia. Wolbachia sp. wRi                          | 5.00E-101 | 88.92            |
| 944 | Bacteria; Chloroflexi; Anaerolineae; Anaerolineales; Anaerolineaceae; Anaerolinea. Anaerolinea thermophila UNI-1                                  | 8.00E-32  | 95.6             |
| 947 | Bacteria; Proteobacteria; Alphaproteobacteria; Rickettsiales; SAR11 cluster; Candidatus Pelagibacter. Candidatus Pelagibacter ubique HTCC1062     | 0         | 95.4             |
| 955 | Bacteria; Proteobacteria; Gammaproteobacteria. gamma proteobacterium NOR5-3                                                                       | 0         | 92.59            |
| 957 | Bacteria; Proteobacteria; Alphaproteobacteria; Rhizobiales; Rhizobiaceae; Rhizobium/Agrobacterium group; Agrobacterium. Agrobacterium sp. H13-3   | 2.00E-91  | 88.3             |
| 958 | Bacteria; Proteobacteria; Alphaproteobacteria; Rickettsiales; SAR11 cluster; Candidatus Pelagibacter. Candidatus Pelagibacter sp. HTCC7211        | 1.00E-166 | 91.54            |
| 960 | Bacteria; Proteobacteria; Alphaproteobacteria; Rhodobacterales; Rhodobacteraceae; Thalassobium. Thalassobium sp. R2A62                            | 1.00E-140 | 94.59            |
| 965 | Bacteria; Firmicutes; Clostridia; Clostridiales; Eubacteriaceae; Anaerofustis. Anaerofustis stercorihominis DSM 17244                             | 6.00E-45  | 88.65            |
| 973 | Bacteria; Proteobacteria; Zetaproteobacteria; Mariprofundales; Mariprofundaceae; Mariprofundus. Mariprofundus ferrooxydans PV-1                   | 4.00E-82  | 89.2             |
| 974 | Bacteria; Cyanobacteria; Chroococcales; Synechococcus. Synechococcus sp. WH 8109                                                                  | 0         | 99.59            |
| 978 | Bacteria; Proteobacteria; Gammaproteobacteria; Oceanospirillales; Hahellaceae; Hahella. Hahella chejuensis KCTC 2396                              | 0         | 94.23            |



| OTU  | Phylogeny of best BLAST hit (refseq_genomic)                                                                                                   | e value   | percent identity |
|------|------------------------------------------------------------------------------------------------------------------------------------------------|-----------|------------------|
| 993  | Bacteria; Chlamydiae; Chlamydiales; Chlamydiaceae; Chlamydomphila. Chlamydomphila abortus S26/3                                                | 4.00E-64  | 85.76            |
| 994  | Bacteria; Firmicutes; Bacillales; Bacillaceae; Bacillus. Bacillus licheniformis ATCC 14580                                                     | 6.00E-82  | 86.57            |
| 996  | Bacteria; Chlamydiae; Chlamydiales; Chlamydiaceae; Chlamydomphila. Chlamydomphila abortus S26/3                                                | 4.00E-86  | 87.43            |
| 998  | Bacteria; Proteobacteria; Alphaproteobacteria; Rickettsiales; SAR11 cluster; Candidatus Pelagibacter. Candidatus Pelagibacter sp. HTCC7211     | 0         | 95.11            |
| 1001 | Bacteria; Proteobacteria; Alphaproteobacteria; Rhodospirillales; Rhodospirillaceae; Rhodospirillum. Rhodospirillum rubrum ATCC 11170           | 7.00E-100 | 88.54            |
| 1003 | Bacteria; Proteobacteria; Gammaproteobacteria; Alteromonadales; Pseudoalteromonadaceae; Pseudoalteromonas. Pseudoalteromonas sp. SM9913        | 0         | 96.3             |
| 1006 | Bacteria; Proteobacteria; Gammaproteobacteria; Chromatiales; Ectothiorhodospiraceae; Thioalkalivibrio. Thioalkalivibrio sulfidophilus HL-EbGr7 | 2.00E-131 | 88.08            |
| 1011 | Bacteria; Proteobacteria; Alphaproteobacteria; Sphingomonadales; Sphingomonadaceae; Sphingomonas. Sphingomonas wittichii RW1                   | 2.00E-103 | 89.38            |
| 1014 | Bacteria; Proteobacteria; Alphaproteobacteria; Rickettsiales; SAR11 cluster; Candidatus Pelagibacter. Candidatus Pelagibacter ubique HTCC1062  | 0         | 94.58            |
| 1015 | Bacteria; Cyanobacteria; Prochlorales; Prochlorococcaceae; Prochlorococcus. Prochlorococcus marinus str. NATL1A                                | 0         | 97.22            |
| 1017 | Bacteria; Proteobacteria; Alphaproteobacteria; Rhodobacterales; Rhodobacteraceae; Rhodobacter. Rhodobacter sphaeroides KD131                   | 1.00E-129 | 93.27            |
| 1018 | Bacteria; Cyanobacteria; Chroococcales; Cyanothece. Cyanothece sp. PCC 7822                                                                    | 8.00E-106 | 89.8             |
| 1022 | Bacteria; Proteobacteria; Gammaproteobacteria; Alteromonadales; Alteromonadaceae; Alteromonas. Alteromonas macleodii str. 'Deep ecotype'       | 0         | 98.92            |
| 1026 | Bacteria; Proteobacteria; Alphaproteobacteria; SAR116 cluster; Candidatus Puniceispirillum. Candidatus Puniceispirillum marinum IMCC1322       | 0         | 95.94            |
| 1027 | Bacteria; Cyanobacteria; Prochlorales; Prochlorococcaceae; Prochlorococcus. Prochlorococcus marinus str. MIT 9202                              | 3.00E-157 | 94.64            |
| 1028 | Bacteria; Proteobacteria; Gammaproteobacteria; Chromatiales; Ectothiorhodospiraceae; Nitrococcus. Nitrococcus mobilis Nb-231                   | 2.00E-94  | 88.07            |
| 1029 | Bacteria; Proteobacteria; Gammaproteobacteria; Alteromonadales; Colwelliaceae; Colwellia. Colwellia psychrerythraea 34H                        | 0         | 93.89            |
| 1033 | Bacteria; Proteobacteria; Alphaproteobacteria; Rickettsiales; SAR11 cluster; Candidatus Pelagibacter. Candidatus Pelagibacter sp. HTCC7211     | 0         | 94.47            |
| 1035 | Bacteria; Cyanobacteria; Chroococcales; Synechococcus. Synechococcus sp. WH 5701                                                               | 2.00E-140 | 93.48            |
| 1037 | Bacteria; Bacteroidetes; Flavobacteria; Flavobacteriales; Flavobacteriaceae; Polaribacter. Polaribacter irgensii 23-P                          | 3.00E-102 | 88.67            |
| 1044 | Bacteria; Proteobacteria; Gammaproteobacteria; Alteromonadales; Shewanellaceae; Shewanella. Shewanella baltica OS223                           | 1.00E-150 | 89.54            |
| 1051 | Bacteria; Cyanobacteria; Prochlorales; Prochlorococcaceae; Prochlorococcus. Prochlorococcus marinus str. MIT 9202                              | 2.00E-152 | 96.88            |
| 1059 | Bacteria; Proteobacteria; Deltaproteobacteria; Desulfuromonadales; Geobacteraceae; Geobacter. Geobacter sp. FRC-32                             | 3.00E-117 | 91.39            |
| 1060 | Bacteria; Proteobacteria; Alphaproteobacteria; Rhodobacterales; Rhodobacteraceae; Rhodobacter. Rhodobacter sphaeroides KD131                   | 8.00E-177 | 92.58            |
| 1063 | Bacteria; Bacteroidetes; Cytophagia; Cytophagales; Cytophagaceae; Dyadobacter. Dyadobacter fermentans DSM 18053                                | 3.00E-111 | 90.31            |
| 1065 | Bacteria; Cyanobacteria; Prochlorales; Prochlorococcaceae; Prochlorococcus. Prochlorococcus marinus str. MIT 9515                              | 0         | 98.67            |
| 1068 | Bacteria; Proteobacteria; Zetaproteobacteria; Mariprofundales; Mariprofundaceae; Mariprofundus. Mariprofundus ferrooxydans PV-1                | 2.00E-91  | 88.32            |
| 1069 | Bacteria; Proteobacteria; Deltaproteobacteria; Desulfuromonadales; Geobacteraceae; Geobacter. Geobacter sp. FRC-32                             | 3.00E-105 | 89.31            |
| 1072 | Bacteria; Proteobacteria; Alphaproteobacteria; Rickettsiales; SAR11 cluster; Candidatus Pelagibacter. Candidatus Pelagibacter sp. HTCC7211     | 0         | 97.54            |
| 1074 | Bacteria; Proteobacteria; Gammaproteobacteria; Alteromonadales; Shewanellaceae; Shewanella. Shewanella woodyi ATCC 51908                       | 1.00E-147 | 89.07            |
| 1076 | Bacteria; Proteobacteria; Gammaproteobacteria; Alteromonadales; Shewanellaceae; Shewanella. Shewanella woodyi ATCC 51908                       | 5.00E-141 | 88.48            |
| 1079 | Bacteria; Proteobacteria; Deltaproteobacteria; Desulfuromonadales; Geobacteraceae; Geobacter. Geobacter sp. M21                                | 6.00E-122 | 88.5             |
| 1082 | Bacteria; Proteobacteria; Gammaproteobacteria; Oceanospirillales; Hahellaceae; Hahella. Hahella chejuensis KCTC 2396                           | 0         | 92.8             |
| 1087 | Bacteria; Bacteroidetes; Sphingobacteria; Sphingobacteriales; Rhodothermaceae; Rhodothermus. Rhodothermus marinus DSM 4252                     | 5.00E-112 | 92.93            |
| 1092 | Bacteria; Proteobacteria; Gammaproteobacteria; Alteromonadales; Shewanellaceae; Shewanella. Shewanella woodyi ATCC 51908                       | 0         | 97.9             |
| 1097 | Bacteria; Proteobacteria; Gammaproteobacteria; Legionellales; Coxiellaceae; Coxiella. Coxiella burnetii CbuK_Q154                              | 2.00E-153 | 90.4             |
| 1098 | Bacteria; Firmicutes; Lactobacillales; Streptococcaceae; Streptococcus. Streptococcus pyogenes ATCC 10782                                      | 2.00E-112 | 90               |
| 1103 | Bacteria; Proteobacteria; Alphaproteobacteria; Rickettsiales; SAR11 cluster; Candidatus Pelagibacter. Candidatus Pelagibacter ubique HTCC1062  | 0         | 95.63            |
| 1106 | Bacteria; Bacteroidetes; Flavobacteria; Flavobacteriales; Flavobacteriaceae; Polaribacter. Polaribacter sp. MED152                             | 0         | 94.58            |
| 1107 | Bacteria; Bacteroidetes; Flavobacteria; Flavobacteriales; Flavobacteriaceae; Gramella. Gramella forsetii KT0803                                | 2.00E-137 | 88.91            |
| 1112 | Bacteria; Verrucomicrobia; Opitutae; Puniceococcales; Puniceococcaceae; Coraliomargarita. Coraliomargarita akajimensis DSM 45221               | 3.00E-151 | 95.87            |
| 1116 | Bacteria; Proteobacteria; Gammaproteobacteria; Oceanospirillales; Alcanivoracaceae; Alcanivorax. Alcanivorax borkumensis SK2                   | 5.00E-138 | 89.76            |

| OTU  | Phylogeny of best BLAST hit (refseq_genomic)                                                                                                                                     | e value   | percent identity |
|------|----------------------------------------------------------------------------------------------------------------------------------------------------------------------------------|-----------|------------------|
| 1118 | Bacteria; Planctomycetes; Planctomycetacia; Planctomycetales; Planctomycetaceae; Planctomyces. <i>Planctomyces brasiliensis</i> DSM 5305                                         | 4.00E-111 | 90.29            |
| 1120 | Bacteria; Actinobacteria; Actinobacteridae; Actinomycetales; Corynebacterineae; Corynebacteriaceae; Corynebacterium. <i>Corynebacterium kroppenstedtii</i> DSM 44385             | 8.00E-72  | 87.22            |
| 1124 | Bacteria; Firmicutes; Clostridia; Clostridiales; Clostridiaceae; Clostridium. <i>Clostridium leptum</i> DSM 753                                                                  | 3.00E-19  | 90.7             |
| 1129 | Bacteria; Cyanobacteria; Chroococcales; Synechococcus. <i>Synechococcus</i> sp. WH 8109                                                                                          | 1.00E-73  | 83.85            |
| 1133 | Bacteria; Proteobacteria; Gammaproteobacteria; Pseudomonadales; Pseudomonadaceae; Pseudomonas; Pseudomonas amygdali. <i>Pseudomonas syringae</i> pv. <i>tabaci</i> ATCC 11528    | 2.00E-130 | 92.33            |
| 1136 | Bacteria; Proteobacteria; Gammaproteobacteria; Chromatiales; Halothiobacillaceae; Halothiobacillus. <i>Halothiobacillus neapolitanus</i> c2                                      | 4.00E-83  | 86.18            |
| 1137 | Bacteria; Proteobacteria; Alphaproteobacteria; Rickettsiales; SAR11 cluster; Candidatus Pelagibacter. <i>Candidatus Pelagibacter ubique</i> HTCC1002                             | 3.00E-117 | 89.76            |
| 1139 | Bacteria; Proteobacteria; Betaproteobacteria; Burkholderiales; Oxalobacteraceae; Herbaspirillum. <i>Herbaspirillum seropedicae</i> SmR1                                          | 4.00E-95  | 88.12            |
| 1142 | Bacteria; Proteobacteria; Deltaproteobacteria; Desulfuromonadales; Pelobacteraceae; Pelobacter. <i>Pelobacter propionicus</i> DSM 2379                                           | 2.00E-143 | 89.95            |
| 1143 | Bacteria; Proteobacteria; Betaproteobacteria; Burkholderiales; Alcaligenaceae; Achromobacter. <i>Achromobacter xylosoxidans</i> A8                                               | 0         | 95.22            |
| 1145 | Bacteria; Cyanobacteria; Prochlorales; Prochlorococcaceae; Prochlorococcus. <i>Prochlorococcus marinus</i> str. MIT 9202                                                         | 0         | 98.75            |
| 1146 | Bacteria; Actinobacteria; Actinobacteridae; Actinomycetales; Propionibacterineae; Nocardoidaceae; Aeromicrobium. <i>Aeromicrobium marinum</i> DSM 15272                          | 8.00E-106 | 89.17            |
| 1149 | Bacteria; Proteobacteria; Gammaproteobacteria; Pseudomonadales; Pseudomonadaceae; Pseudomonas. <i>Pseudomonas fluorescens</i> Pf-5                                               | 7.00E-137 | 88.89            |
| 1154 | Bacteria; Proteobacteria; Deltaproteobacteria; Desulfovibrionales; Desulfomicrobiaceae; Desulfomicrobium. <i>Desulfomicrobium baculatum</i> DSM 4028                             | 2.00E-79  | 86.32            |
| 1156 | Bacteria; Cyanobacteria; Chroococcales; Cyanothecae. <i>Cyanothecae</i> sp. ATCC 51142                                                                                           | 0         | 99.17            |
| 1157 | Bacteria; Proteobacteria; Alphaproteobacteria; Rickettsiales; SAR11 cluster; Candidatus Pelagibacter. <i>Candidatus Pelagibacter</i> sp. HTCC7211                                | 2.00E-152 | 95.85            |
| 1159 | Bacteria; Proteobacteria; Deltaproteobacteria; Desulfuromonadales; Geobacteraceae; Geobacter. <i>Geobacter</i> sp. FRC-32                                                        | 7.00E-72  | 86.4             |
| 1161 | Bacteria; Proteobacteria; Alphaproteobacteria; Rhizobiales; Phyllobacteriaceae; Mesorhizobium. <i>Mesorhizobium ciceri</i> biovar <i>biserrulae</i> WSM1271                      | 4.00E-91  | 97.89            |
| 1166 | Bacteria; Proteobacteria; Betaproteobacteria; Burkholderiales; Alcaligenaceae; Achromobacter. <i>Achromobacter xylosoxidans</i> A8                                               | 0         | 93.87            |
| 1168 | Bacteria; Bacteroidetes; Cytophagia; Cytophagales; Cytophagaceae; Cytophaga. <i>Cytophaga hutchinsonii</i> ATCC 33406                                                            | 1.00E-141 | 93.45            |
| 1178 | Bacteria; Proteobacteria; Gammaproteobacteria; Vibrionales; Vibrionaceae; Vibrio. <i>Vibrio cholerae</i> AM-19226                                                                | 6.00E-85  | 84.25            |
| 1180 | Bacteria; Proteobacteria; Gammaproteobacteria; Legionellales; Coxiellaceae; Coxiella. <i>Coxiella burnetii</i> CbuK_Q154                                                         | 2.00E-119 | 92.9             |
| 1184 | Bacteria; Proteobacteria; Alphaproteobacteria; Rhizobiales; Bartonellaceae; Bartonella. <i>Bartonella grahamii</i> as4aup                                                        | 3.00E-124 | 87.63            |
| 1187 | Bacteria; Proteobacteria; Gammaproteobacteria; Alteromonadales; Shewanellaceae; Shewanella. <i>Shewanella</i> sp. ANA-3                                                          | 0         | 95.81            |
| 1188 | Bacteria; Proteobacteria; Deltaproteobacteria; Desulfuromonadales; Geobacteraceae; Geobacter. <i>Geobacter uraniireducens</i> Rf4                                                | 2.00E-106 | 89.83            |
| 1191 | Bacteria; Proteobacteria; Deltaproteobacteria; Desulfuromonadales; Pelobacteraceae; Pelobacter. <i>Pelobacter propionicus</i> DSM 2379                                           | 7.00E-131 | 87.73            |
| 1196 | Bacteria; Cyanobacteria; Prochlorales; Prochlorococcaceae; Prochlorococcus. <i>Prochlorococcus marinus</i> str. NATL2A                                                           | 6.00E-156 | 89.71            |
| 1198 | Bacteria; Cyanobacteria; Prochlorales; Prochlorococcaceae; Prochlorococcus. <i>Prochlorococcus marinus</i> str. MIT 9202                                                         | 1.00E-138 | 94.82            |
| 1200 | Bacteria; Proteobacteria; Gammaproteobacteria; Alteromonadales; Shewanellaceae; Shewanella. <i>Shewanella</i> sp. ANA-3                                                          | 2.00E-93  | 87.03            |
| 1203 | Bacteria; Proteobacteria; Gammaproteobacteria; Legionellales; Coxiellaceae; Coxiella. <i>Coxiella burnetii</i> CbuK_Q154                                                         | 9.00E-152 | 89.83            |
| 1204 | Bacteria; Proteobacteria; Deltaproteobacteria; Desulfuromonadales; Geobacteraceae; Geobacter. <i>Geobacter sulfurreducens</i> PCA                                                | 1.00E-166 | 90.78            |
| 1210 | Bacteria; Proteobacteria; Gammaproteobacteria; Pseudomonadales; Pseudomonadaceae; Pseudomonas; Pseudomonas coronafaciens. <i>Pseudomonas syringae</i> pv. <i>oryzae</i> str. 1_6 | 2.00E-112 | 87.56            |
| 1211 | Bacteria; Bacteroidetes; Flavobacteria; Flavobacteriales; Flavobacteriaceae; Cellulophaga. <i>Cellulophaga algicola</i> DSM 14237                                                | 0         | 92.41            |
| 1212 | Bacteria; Planctomycetes; Planctomycetacia; Planctomycetales; Planctomycetaceae; Rhodopirellula. <i>Rhodopirellula baltica</i> SH 1                                              | 1.00E-98  | 90.35            |
| 1215 | Bacteria; Proteobacteria; Deltaproteobacteria; Desulfuromonadales; Geobacteraceae; Geobacter. <i>Geobacter</i> sp. M21                                                           | 3.00E-102 | 89.49            |
| 1218 | Bacteria; Proteobacteria; Gammaproteobacteria; Alteromonadales; Shewanellaceae; Shewanella. <i>Shewanella woodyi</i> ATCC 51908                                                  | 1.00E-144 | 88.96            |
| 1220 | Bacteria; Proteobacteria; Gammaproteobacteria; Oceanospirillales; Alcanivoracaceae; Alcanivorax. <i>Alcanivorax borkumensis</i> SK2                                              | 9.00E-84  | 86.57            |
| 1228 | Bacteria; Proteobacteria; Deltaproteobacteria; Desulfuromonadales; Geobacteraceae; Geobacter. <i>Geobacter</i> sp. FRC-32                                                        | 4.00E-89  | 87.43            |
| 1229 | Bacteria; Proteobacteria; Alphaproteobacteria; Rickettsiales; SAR11 cluster; Candidatus Pelagibacter. <i>Candidatus Pelagibacter ubique</i> HTCC1062                             | 2.00E-177 | 91.58            |

| OTU  | Phylogeny of best BLAST hit (refseq_genomic)                                                                                                          | e value   | percent identity |
|------|-------------------------------------------------------------------------------------------------------------------------------------------------------|-----------|------------------|
| 1233 | Bacteria; Chlamydiae; Chlamydiales; Parachlamydiaceae; Candidatus Protochlamydia. Candidatus Protochlamydia amoebophila UWE25                         | 2.00E-111 | 90.59            |
| 1235 | Bacteria; Proteobacteria; Alphaproteobacteria; Rickettsiales; SAR11 cluster; Candidatus Pelagibacter. Candidatus Pelagibacter ubique HTCC1002         | 0         | 93.93            |
| 1237 | Bacteria; Proteobacteria; Betaproteobacteria; Burkholderiales; Comamonadaceae; Polaromonas. Polaromonas sp. JS666                                     | 5.00E-175 | 92.16            |
| 1246 | Bacteria; Proteobacteria; Alphaproteobacteria; SAR116 cluster; Candidatus Puniceispirillum. Candidatus Puniceispirillum marinum IMCC1322              | 4.00E-107 | 89.68            |
| 1247 | Bacteria; Cyanobacteria; Prochlorales; Prochlorococcaceae; Prochlorococcus. Prochlorococcus marinus str. MIT 9202                                     | 1.00E-162 | 96.69            |
| 1248 | Bacteria; Proteobacteria; Alphaproteobacteria; Rickettsiales; SAR11 cluster; Candidatus Pelagibacter. Candidatus Pelagibacter ubique HTCC1062         | 0         | 98.15            |
| 1251 | Bacteria; Cyanobacteria; Prochlorales; Prochlorococcaceae; Prochlorococcus. Prochlorococcus marinus str. MIT 9202                                     | 3.00E-102 | 90.71            |
| 1255 | Bacteria; Chlamydiae; Chlamydiales; Chlamydiaceae; Chlamydophila. Chlamydophila abortus S26/3                                                         | 3.00E-74  | 86.29            |
| 1259 | Bacteria; Bacteroidetes; Flavobacteria; Flavobacteriales; Flavobacteriaceae; Cellulophaga. Cellulophaga algicola DSM 14237                            | 1.00E-154 | 90.76            |
| 1263 | Bacteria; Proteobacteria; Gammaproteobacteria; Pseudomonadales; Pseudomonadaceae; Pseudomonas. Pseudomonas fluorescens Pf-5                           | 0         | 93.37            |
| 1265 | Bacteria; Bacteroidetes; Cytophagia; Cytophagales; Cytophagaceae; Cytophaga. Cytophaga hutchinsonii ATCC 33406                                        | 3.00E-80  | 93.75            |
| 1269 | Bacteria; Proteobacteria; Deltaproteobacteria; Syntrophobacteriales; Syntrophaceae; Syntrophus. Syntrophus aciditrophicus SB                          | 9.00E-115 | 87.55            |
| 1274 | Bacteria; Proteobacteria; Gammaproteobacteria; Legionellales; Coxiellaceae; Coxiella. Coxiella burnetii CbuK_Q154                                     | 7.00E-122 | 91.43            |
| 1280 | Bacteria; Cyanobacteria; Chroococcales; Cyanobium. Cyanobium sp. PCC 7001                                                                             | 2.00E-131 | 92.49            |
| 1281 | Bacteria; Verrucomicrobia; Opitutae; Puniceococcales; Puniceococcaceae; Coraliomargarita. Coraliomargarita akajimensis DSM 45221                      | 2.00E-115 | 90.6             |
| 1289 | Bacteria; Proteobacteria; Deltaproteobacteria; Myxococcales; Cystobacterineae; Myxococcaceae; Anaeromyxobacter. Anaeromyxobacter dehalogenans 2CP-1   | 2.00E-119 | 91.43            |
| 1298 | Bacteria; Cyanobacteria; Prochlorales; Prochlorococcaceae; Prochlorococcus. Prochlorococcus marinus str. NATL2A                                       | 0         | 98.83            |
| 1300 | Bacteria; Cyanobacteria; Prochlorales; Prochlorococcaceae; Prochlorococcus. Prochlorococcus marinus str. MIT 9202                                     | 1.00E-172 | 97.15            |
| 1306 | Bacteria; Proteobacteria; Alphaproteobacteria; Rhizobiales; Beijerinckiaceae; Beijerinckia. Beijerinckia indica subsp. indica ATCC 9039               | 2.00E-116 | 91.12            |
| 1314 | Bacteria; Proteobacteria; Alphaproteobacteria; Rhizobiales; Rhizobiaceae; Sinorhizobium/Ensifer group; Sinorhizobium. Sinorhizobium medicae WSM419    | 4.00E-123 | 86.97            |
| 1315 | Bacteria; Cyanobacteria; Prochlorales; Prochlorococcaceae; Prochlorococcus. Prochlorococcus marinus str. MIT 9202                                     | 7.00E-177 | 99.4             |
| 1316 | Bacteria; Bacteroidetes; Cytophagia; Cytophagales; Flammeovirgaceae; Marivirga. Marivirga tractuosa DSM 4126                                          | 2.00E-106 | 89.52            |
| 1323 | Bacteria; Proteobacteria; Gammaproteobacteria; Oceanospirillales; Hahellaceae; Hahella. Hahella chejuensis KCTC 2396                                  | 3.00E-173 | 91.6             |
| 1327 | Bacteria; Cyanobacteria; Prochlorales; Prochlorococcaceae; Prochlorococcus. Prochlorococcus marinus str. NATL2A                                       | 7.00E-180 | 98.59            |
| 1329 | Bacteria; Cyanobacteria; Prochlorales; Prochlorococcaceae; Prochlorococcus. Prochlorococcus marinus str. MIT 9202                                     | 0         | 99.42            |
| 1335 | Bacteria; Proteobacteria; Gammaproteobacteria; Pseudomonadales; Pseudomonadaceae; Cellvibrio. Cellvibrio japonicus Ueda107                            | 1.00E-147 | 89.19            |
| 1339 | Bacteria; Proteobacteria; Gammaproteobacteria; Alteromonadales; Shewanellaceae; Shewanella. Shewanella piezotolerans WP3                              | 7.00E-171 | 91.89            |
| 1344 | Bacteria; Proteobacteria; Alphaproteobacteria; Rhodospirillales; Rhodospirillaceae; Rhodospirillum. Rhodospirillum rubrum ATCC 11170                  | 3.00E-111 | 89.77            |
| 1345 | Bacteria; Proteobacteria; Deltaproteobacteria; Desulfovibrionales; Desulfomicrobiaceae; Desulfomicrobium. Desulfomicrobium baculatum DSM 4028         | 3.00E-81  | 86.57            |
| 1349 | Bacteria; Actinobacteria; Actinobacteridae; Actinomycetales; Micrococciaceae; Intrasporangiaceae; Janibacter. Janibacter sp. HTCC2649                 | 7.00E-94  | 88.03            |
| 1351 | Bacteria; Cyanobacteria; Prochlorales; Prochlorococcaceae; Prochlorococcus. Prochlorococcus marinus str. MIT 9202                                     | 0         | 99.42            |
| 1354 | Bacteria; Verrucomicrobia; Opitutae; Puniceococcales; Puniceococcaceae; Coraliomargarita. Coraliomargarita akajimensis DSM 45221                      | 2.00E-119 | 90.86            |
| 1357 | Bacteria; Bacteroidetes; Flavobacteria; Flavobacteriales; Flavobacteriaceae; Cellulophaga. Cellulophaga algicola DSM 14237                            | 5.00E-169 | 91.82            |
| 1360 | Bacteria; Bacteroidetes; Bacteroidia; Bacteroidales; Bacteroidaceae; Bacteroides. Bacteroides eggerthii DSM 20697                                     | 2.00E-109 | 89.68            |
| 1364 | Bacteria; Bacteroidetes; Flavobacteria; Flavobacteriales; Flavobacteriaceae; Robiginitalea. Robiginitalea biformata HTCC2501                          | 0         | 94.13            |
| 1365 | Bacteria; Proteobacteria; Gammaproteobacteria; Oceanospirillales; Hahellaceae; Hahella. Hahella chejuensis KCTC 2396                                  | 3.00E-155 | 89.92            |
| 1369 | Bacteria; Proteobacteria; Alphaproteobacteria; Rhodospirillales; Rhodospirillaceae; Rhodospirillum. Rhodospirillum rubrum ATCC 11170                  | 1.00E-101 | 88.64            |
| 1370 | Bacteria; Verrucomicrobia; Opitutae; Puniceococcales; Puniceococcaceae; Coraliomargarita. Coraliomargarita akajimensis DSM 45221                      | 8.00E-115 | 90.57            |
| 1373 | Bacteria; Actinobacteria; Actinobacteridae; Actinomycetales; Propionibacterineae; Nocardioideae; Kribbella. Kribbella flavida DSM 17836               | 4.00E-86  | 87.57            |
| 1380 | Bacteria; Proteobacteria; Alphaproteobacteria; Caulobacteriales; Caulobacteraceae; Caulobacter. Caulobacter segnis ATCC 21756                         | 6.00E-51  | 89.3             |
| 1384 | Bacteria; Proteobacteria; Alphaproteobacteria; Rickettsiales; Rickettsiaceae; Rickettsiae; Rickettsia; spotted fever group. Rickettsia massiliae MTU5 | 2.00E-119 | 87.03            |
| 1395 | Bacteria; Proteobacteria; Alphaproteobacteria; Rhizobiales; Bartonellaceae; Bartonella. Bartonella quintana str. Toulouse                             | 2.00E-118 | 90.13            |

| OTU  | Phylogeny of best BLAST hit (refseq_genomic)                                                                                                                                     | e value   | percent identity |
|------|----------------------------------------------------------------------------------------------------------------------------------------------------------------------------------|-----------|------------------|
| 1397 | Bacteria; Deinococcus-Thermus; Deinococci; Deinococcales; Trueperaceae; Truepera. <i>Truepera radiovictrix</i> DSM 17093                                                         | 5.00E-101 | 85.18            |
| 1398 | Bacteria; Proteobacteria; Gammaproteobacteria; Oceanospirillales; Alcanivoracaceae; Alcanivorax. <i>Alcanivorax borkumensis</i> SK2                                              | 0         | 93.83            |
| 1405 | Bacteria; Bacteroidetes; Cytophagia; Cytophagales; Flammeovirgaceae; Marivirga. <i>Marivirga tractuosa</i> DSM 4126                                                              | 4.00E-154 | 94.89            |
| 1406 | Bacteria; Proteobacteria; Alphaproteobacteria; SAR116 cluster; Candidatus Puniceispirillum. <i>Candidatus Puniceispirillum marinum</i> IMCC1322                                  | 1.00E-172 | 92.87            |
| 1410 | Bacteria; Proteobacteria; Deltaproteobacteria; Desulfuromonadales; Pelobacteraceae; Pelobacter. <i>Pelobacter carbinolicus</i> DSM 2380                                          | 2.00E-109 | 89.52            |
| 1419 | Bacteria; Proteobacteria; Alphaproteobacteria; SAR116 cluster; Candidatus Puniceispirillum. <i>Candidatus Puniceispirillum marinum</i> IMCC1322                                  | 2.00E-133 | 92.55            |
| 1421 | Bacteria; Proteobacteria; Alphaproteobacteria; Rhizobiales; Bartonellaceae; Bartonella. <i>Bartonella quintana</i> str. Toulouse                                                 | 8.00E-106 | 90.29            |
| 1425 | Bacteria; Cyanobacteria; Prochlorales; Prochlorococcaceae; Prochlorococcus. <i>Prochlorococcus marinus</i> str. MIT 9211                                                         | 0         | 99.38            |
| 1427 | Bacteria; Proteobacteria; Gammaproteobacteria; Legionellales; Coxiellaceae; Coxiella. <i>Coxiella burnetii</i> CbuK_Q154                                                         | 3.00E-164 | 90.99            |
| 1430 | Bacteria; Proteobacteria; Alphaproteobacteria; Rhizobiales; Phyllobacteriaceae; Hoeflea. <i>Hoeflea phototrophica</i> DFL-43                                                     | 3.00E-59  | 85.59            |
| 1432 | Bacteria; Proteobacteria; Gammaproteobacteria; Chromatiales; Halothiobacillaceae; Halothiobacillus. <i>Halothiobacillus neapolitanus</i> c2                                      | 3.00E-96  | 88.32            |
| 1436 | Bacteria; Proteobacteria; Zetaproteobacteria; Mariprofundales; Mariprofundaceae; Mariprofundus. <i>Mariprofundus ferrooxydans</i> PV-1                                           | 7.00E-97  | 88.32            |
| 1437 | Bacteria; Proteobacteria; Gammaproteobacteria; Pseudomonadales; Pseudomonadaceae; Pseudomonas. <i>Pseudomonas fluorescens</i> Pf0-1                                              | 2.00E-69  | 84.86            |
| 1442 | Bacteria; Proteobacteria; Deltaproteobacteria; Desulfuromonadales; Geobacteraceae; Geobacter. <i>Geobacter sulfurreducens</i> PCA                                                | 2.00E-159 | 90.62            |
| 1445 | Bacteria; Proteobacteria; Alphaproteobacteria; Rickettsiales; Rickettsiaceae; Rickettsia. <i>Rickettsia tsutsugamushi</i> str. Ikeda                                             | 4.00E-74  | 84.76            |
| 1449 | Bacteria; Chlamydiae; Chlamydiales; Chlamydiaceae; Chlamydia. <i>Chlamydia abortus</i> S26/3                                                                                     | 2.00E-152 | 89.48            |
| 1452 | Bacteria; Proteobacteria; Gammaproteobacteria; Pseudomonadales; Pseudomonadaceae; Pseudomonas; Pseudomonas coronafaciens. <i>Pseudomonas syringae</i> pv. <i>oryzae</i> str. 1_6 | 0         | 92.2             |
| 1454 | Bacteria; Proteobacteria; Alphaproteobacteria; Rickettsiales; SAR11 cluster; Candidatus Pelagibacter. <i>Candidatus Pelagibacter</i> sp. HTCC7211                                | 0         | 94.19            |
| 1455 | Bacteria; Cyanobacteria; Prochlorales; Prochlorococcaceae; Prochlorococcus. <i>Prochlorococcus marinus</i> str. MIT 9202                                                         | 0         | 97.07            |
| 1457 | Bacteria; Proteobacteria; Alphaproteobacteria; SAR116 cluster; Candidatus Puniceispirillum. <i>Candidatus Puniceispirillum marinum</i> IMCC1322                                  | 0         | 98.25            |
| 1461 | Bacteria; Proteobacteria; Gammaproteobacteria; Chromatiales; Halothiobacillaceae; Halothiobacillus. <i>Halothiobacillus neapolitanus</i> c2                                      | 7.00E-94  | 88.32            |
| 1463 | Bacteria; Proteobacteria; Gammaproteobacteria; Legionellales; Coxiellaceae; Coxiella. <i>Coxiella burnetii</i> CbuK_Q154                                                         | 5.00E-144 | 89.63            |
| 1468 | Bacteria; Proteobacteria; Alphaproteobacteria; Rickettsiales; SAR11 cluster; Candidatus Pelagibacter. <i>Candidatus Pelagibacter ubique</i> HTCC1002                             | 6.00E-156 | 95.39            |
| 1477 | Bacteria; Proteobacteria; Deltaproteobacteria; Desulfovibrionales; Desulfovibrionaceae; Desulfovibrio. <i>Desulfovibrio salexigens</i> DSM 2638                                  | 3.00E-87  | 87.46            |
| 1478 | Bacteria; Proteobacteria; Deltaproteobacteria; Desulfuromonadales; Geobacteraceae; Geobacter. <i>Geobacter</i> sp. FRC-32                                                        | 1.00E-122 | 91.64            |
| 1480 | Bacteria; Proteobacteria; Deltaproteobacteria; Myxococcales; Cystobacterineae; Myxococcaceae; Anaeromyxobacter. <i>Anaeromyxobacter dehalogenans</i> ZCP-1                       | 2.00E-128 | 87.68            |
| 1481 | Bacteria; Actinobacteria; Actinobacteridae; Actinomycetales; Micrococccineae; Intrasporangiaceae; Janibacter. <i>Janibacter</i> sp. HTCC2649                                     | 2.00E-91  | 87.46            |
| 1482 | Bacteria; Proteobacteria; Alphaproteobacteria; Rickettsiales; SAR11 cluster; Candidatus Pelagibacter. <i>Candidatus Pelagibacter ubique</i> HTCC1002                             | 3.00E-111 | 90.56            |
| 1488 | Bacteria; Proteobacteria; Gammaproteobacteria; Vibrionales; Vibrionaceae; Vibrio. <i>Vibrio harveyi</i> HY01                                                                     | 0         | 98.47            |
| 1491 | Bacteria; Proteobacteria; Deltaproteobacteria; Desulfuromonadales; Geobacteraceae; Geobacter. <i>Geobacter</i> sp. FRC-32                                                        | 3.00E-96  | 88.58            |
| 1492 | Bacteria; Cyanobacteria; Prochlorales; Prochlorococcaceae; Prochlorococcus. <i>Prochlorococcus marinus</i> str. MIT 9202                                                         | 2.00E-143 | 98.3             |
| 1495 | Bacteria; Proteobacteria; Gammaproteobacteria; Chromatiales; Halothiobacillaceae; Halothiobacillus. <i>Halothiobacillus neapolitanus</i> c2                                      | 3.00E-93  | 85.71            |
| 1496 | Bacteria; Chloroflexi; Anaerolineae; Anaerolineales; Anaerolineaceae; Anaerolinea. <i>Anaerolinea thermophila</i> UNI-1                                                          | 1.00E-138 | 89.39            |
| 1503 | Bacteria; Proteobacteria; Alphaproteobacteria; Rickettsiales; SAR11 cluster; Candidatus Pelagibacter. <i>Candidatus Pelagibacter ubique</i> HTCC1002                             | 1.00E-153 | 95.1             |
| 1506 | Bacteria; Proteobacteria; Alphaproteobacteria; Rickettsiales; SAR11 cluster; Candidatus Pelagibacter. <i>Candidatus Pelagibacter ubique</i> HTCC1062                             | 0         | 96.3             |
| 1514 | Bacteria; Bacteroidetes; Flavobacteria; Flavobacteriales; Flavobacteriaceae; Robiginitalea. <i>Robiginitalea biformata</i> HTCC2501                                              | 2.00E-115 | 92.93            |
| 1515 | Bacteria; Proteobacteria; Alphaproteobacteria; Rickettsiales; SAR11 cluster; Candidatus Pelagibacter. <i>Candidatus Pelagibacter ubique</i> HTCC1002                             | 2.00E-168 | 90.98            |
| 1516 | Bacteria; Proteobacteria; Betaproteobacteria; Burkholderiales; Leptothrix. <i>Leptothrix cholodnii</i> SP-6                                                                      | 4.00E-126 | 88.91            |
| 1517 | Bacteria; Bacteroidetes; Flavobacteria; Flavobacteriales; Flavobacteriaceae; Polaribacter. <i>Polaribacter</i> sp. MED152                                                        | 0         | 98.52            |
| 1519 | Bacteria; Proteobacteria; Deltaproteobacteria; Desulfuromonadales; Geobacteraceae; Geobacter. <i>Geobacter bemidjensis</i> Bem                                                   | 2.00E-159 | 90.7             |
| 1525 | Bacteria; Proteobacteria; Gammaproteobacteria; Legionellales; Legionellaceae; Legionella. <i>Legionella pneumophila</i> 2300/99 Alcoy                                            | 3.00E-108 | 86.5             |

| OTU  | Phylogeny of best BLAST hit (refseq_genomic)                                                                                                                         | e value   | percent identity |
|------|----------------------------------------------------------------------------------------------------------------------------------------------------------------------|-----------|------------------|
| 1530 | Bacteria; Proteobacteria; Deltaproteobacteria; Desulfuromonadales; Pelobacteraceae; Pelobacter. Pelobacter propionicus DSM 2379                                      | 2.00E-106 | 86.83            |
| 1534 | Bacteria; Proteobacteria; Alphaproteobacteria; Rickettsiales; SAR11 cluster; Candidatus Pelagibacter. Candidatus Pelagibacter ubique HTCC1002                        | 2.00E-111 | 93.49            |
| 1538 | Bacteria; Proteobacteria; Alphaproteobacteria; Rhizobiales; Brucellaceae; Ochrobactrum. Ochrobactrum anthropi ATCC 49188                                             | 0         | 93.93            |
| 1541 | Bacteria; Proteobacteria; Alphaproteobacteria; SAR116 cluster; Candidatus Puniceispirillum. Candidatus Puniceispirillum marinum IMCC1322                             | 1.00E-178 | 92.62            |
| 1545 | Bacteria; Proteobacteria; Gammaproteobacteria; Pseudomonadales; Moraxellaceae; Acinetobacter; Acinetobacter calcoaceticus/baumannii complex. Acinetobacter sp. SH024 | 5.00E-172 | 90.95            |
| 1546 | Bacteria; Proteobacteria; Gammaproteobacteria; OMG group; SAR92 clade. gamma proteobacterium HTCC2207                                                                | 0         | 94.44            |
| 1553 | Bacteria; Proteobacteria; Betaproteobacteria; Burkholderiales; Oxalobacteraceae; Herbaspirillum. Herbaspirillum seropedicae SmR1                                     | 5.00E-76  | 85.8             |
| 1554 | Bacteria; Proteobacteria; Gammaproteobacteria; Alteromonadales; Pseudoalteromonadaceae; Pseudoalteromonas. Pseudoalteromonas tunicata D2                             | 0         | 93.48            |
| 1561 | Bacteria; Proteobacteria; Alphaproteobacteria; Sphingomonadales; Sphingomonadaceae; Sphingopyxis. Sphingopyxis alaskensis RB2256                                     | 2.00E-115 | 87.34            |
| 1568 | Bacteria; Proteobacteria; Gammaproteobacteria; Pseudomonadales; Pseudomonadaceae; Pseudomonas. Pseudomonas fluorescens Pf0-1                                         | 4.00E-86  | 86.86            |
| 1570 | Bacteria; Proteobacteria; Alphaproteobacteria; Rhizobiales; Bradyrhizobiaceae; Rhodopseudomonas. Rhodopseudomonas palustris BisA53                                   | 1.00E-91  | 88.32            |
| 1571 | Bacteria; Proteobacteria; Gammaproteobacteria; Legionellales; Legionellaceae; Legionella. Legionella longbeachae NSW150                                              | 9.00E-149 | 89.32            |
| 1574 | Bacteria; Proteobacteria; Alphaproteobacteria; Rickettsiales; SAR11 cluster; Candidatus Pelagibacter. Candidatus Pelagibacter sp. HTCC7211                           | 2.00E-168 | 97.94            |
| 1575 | Bacteria; Proteobacteria; Deltaproteobacteria; Syntrophobacteriales; Syntrophaceae; Syntrophus. Syntrophus aciditrophicus SB                                         | 2.00E-152 | 89.52            |
| 1582 | Bacteria; Cyanobacteria; Prochlorales; Prochlorococcaceae; Prochlorococcus. Prochlorococcus marinus str. MIT 9515                                                    | 0         | 98.37            |
| 1583 | Bacteria; Cyanobacteria; Prochlorales; Prochlorococcaceae; Prochlorococcus. Prochlorococcus marinus str. MIT 9211                                                    | 6.00E-122 | 87.53            |
| 1587 | Bacteria; Proteobacteria; Gammaproteobacteria; Pseudomonadales; Pseudomonadaceae; Pseudomonas; Pseudomonas coronafaciens. Pseudomonas syringae pv. oryzae str. 1_6   | 4.00E-120 | 86.86            |
| 1588 | Bacteria; Proteobacteria; Deltaproteobacteria; Desulfuromonadales; Geobacteraceae; Geobacter. Geobacter metallireducens GS-15                                        | 6.00E-122 | 88.3             |
| 1591 | Bacteria; Proteobacteria; Gammaproteobacteria; Legionellales; Legionellaceae; Legionella. Legionella pneumophila 2300/99 Alcoy                                       | 2.00E-124 | 91.81            |
| 1592 | Bacteria; Bacteroidetes; Sphingobacteria; Sphingobacteriales; Sphingobacteriaceae; Sphingobacterium. Sphingobacterium spiritivorum ATCC 33861                        | 2.00E-140 | 89.5             |
| 1595 | Bacteria; Proteobacteria; Deltaproteobacteria; Desulfovibrionales; Desulfovibrionaceae; Desulfovibrio. Desulfovibrio aespoensis Aspo-2                               | 1.00E-83  | 86.57            |
| 1596 | Bacteria; Proteobacteria; Alphaproteobacteria; Rickettsiales; SAR11 cluster; Candidatus Pelagibacter. Candidatus Pelagibacter ubique HTCC1062                        | 5.00E-178 | 91.6             |
| 1597 | Bacteria; Proteobacteria; Deltaproteobacteria; Desulfuromonadales; Pelobacteraceae; Pelobacter. Pelobacter propionicus DSM 2379                                      | 5.00E-169 | 90.99            |
| 1602 | Bacteria; Bacteroidetes; Sphingobacteria; Sphingobacteriales; Sphingobacteriaceae; Sphingobacterium. Sphingobacterium spiritivorum ATCC 33861                        | 2.00E-109 | 90.26            |
| 1607 | Bacteria; Proteobacteria; Gammaproteobacteria; Vibrionales; Vibrionaceae; Vibrio. Vibrio harveyi HY01                                                                | 0         | 98.86            |
| 1609 | Bacteria; Proteobacteria; Deltaproteobacteria; Desulfovibrionales; Desulfomicrobiaceae; Desulfomicrobium. Desulfomicrobium baculatum DSM 4028                        | 6.00E-82  | 86.61            |
| 1610 | Bacteria; Cyanobacteria; Prochlorales; Prochlorococcaceae; Prochlorococcus. Prochlorococcus marinus str. MIT 9202                                                    | 3.00E-157 | 96.39            |
| 1611 | Bacteria; Proteobacteria; Gammaproteobacteria; Chromatiales; Ectothiorhodospiraceae; Alkalilimnicola. Alkalilimnicola ehrlichii MLHE-1                               | 4.00E-157 | 90.27            |
| 1616 | Bacteria; Proteobacteria; Deltaproteobacteria; Desulfuromonadales; Geobacteraceae; Geobacter. Geobacter sp. FRC-32                                                   | 1.00E-86  | 87.43            |
| 1621 | Bacteria; Proteobacteria; Deltaproteobacteria; Desulfuromonadales; Geobacteraceae; Geobacter. Geobacter sp. M18                                                      | 2.00E-66  | 85.51            |
| 1623 | Bacteria; Proteobacteria; Alphaproteobacteria; Rickettsiales; SAR11 cluster; Candidatus Pelagibacter. Candidatus Pelagibacter ubique HTCC1002                        | 1.00E-98  | 91.1             |
| 1624 | Bacteria; Bacteroidetes; Flavobacteria; Flavobacteriales; Flavobacteriaceae; Robiginitalea. Robiginitalea biformata HTCC2501                                         | 3.00E-161 | 90.87            |
| 1626 | Bacteria; Proteobacteria; Alphaproteobacteria; Rhodospirillales; Rhodospirillaceae; Rhodospirillum. Rhodospirillum rubrum ATCC 11170                                 | 3.00E-71  | 87.04            |
| 1627 | Bacteria; Proteobacteria; Alphaproteobacteria; Rhizobiales; Phyllobacteriaceae; Mesorhizobium. Mesorhizobium loti MAFF303099                                         | 2.00E-155 | 90.38            |
| 1631 | Bacteria; Proteobacteria; Deltaproteobacteria; Desulfuromonadales; Geobacteraceae; Geobacter. Geobacter sp. M21                                                      | 4.00E-89  | 87.43            |
| 1639 | Bacteria; Proteobacteria; Gammaproteobacteria; Legionellales; Coxiellaceae; Coxiella. Coxiella burnetii CbuK_Q154                                                    | 1.00E-101 | 89.49            |
| 1642 | Bacteria; Proteobacteria; Alphaproteobacteria; Rickettsiales; SAR11 cluster; Candidatus Pelagibacter. Candidatus Pelagibacter sp. HTCC7211                           | 2.00E-106 | 90.17            |
| 1643 | Bacteria; Proteobacteria; Gammaproteobacteria; Chromatiales; Halothiobacillaceae; Halothiobacillus. Halothiobacillus neapolitanus c2                                 | 5.00E-101 | 88.89            |
| 1644 | Bacteria; Proteobacteria; Alphaproteobacteria; Rhodospirillales; Rhodospirillaceae; Magnetospirillum. Magnetospirillum magneticum AMB-1                              | 4.00E-114 | 90.62            |
| 1650 | Bacteria; Deferribacteres; Deferribacterales; Deferribacteraceae; Deferribacter. Deferribacter desulfuricans SSM1                                                    | 2.00E-63  | 84.38            |

| OTU  | Phylogeny of best BLAST hit (refseq_genomic)                                                                                                  | e value   | percent identity |
|------|-----------------------------------------------------------------------------------------------------------------------------------------------|-----------|------------------|
| 1651 | Bacteria; Proteobacteria; Gammaproteobacteria; Alteromonadales; Alteromonadaceae; Alteromonas. Alteromonas macleodii str. 'Deep ecotype'      | 5.00E-178 | 91.88            |
| 1653 | Bacteria; Proteobacteria; Alphaproteobacteria; Rickettsiales; SAR11 cluster; Candidatus Pelagibacter. Candidatus Pelagibacter ubique HTCC1002 | 3.00E-52  | 91.12            |
| 1656 | Bacteria; Proteobacteria; Alphaproteobacteria; Rickettsiales; SAR11 cluster; Candidatus Pelagibacter. Candidatus Pelagibacter ubique HTCC1002 | 2.00E-146 | 94.99            |
| 1658 | Bacteria; Proteobacteria; Alphaproteobacteria; Rickettsiales; SAR11 cluster; Candidatus Pelagibacter. Candidatus Pelagibacter sp. HTCC7211    | 1.00E-153 | 95.1             |
| 1661 | Bacteria; Cyanobacteria; Prochlorales; Prochlorococcales; Prochlorococcus. Prochlorococcus marinus str. MIT 9515                              | 0         | 98.38            |
| 1664 | Bacteria; Bacteroidetes; Flavobacteria; Flavobacteriales; Flavobacteriaceae; Robiginitalea. Robiginitalea biformata HTCC2501                  | 0         | 94.78            |
| 1665 | Bacteria; Bacteroidetes; Cytophagia; Cytophagales; Cyclobacteriaceae; Algoriphagus. Algoriphagus sp. PR1                                      | 3.00E-117 | 90.57            |
| 1666 | Bacteria; Bacteroidetes; Flavobacteria; Flavobacteriales; Flavobacteriaceae; Dokdonia. Dokdonia donghaensis MED134                            | 0         | 95.26            |
| 1668 | Bacteria; Proteobacteria; Alphaproteobacteria; Rickettsiales; SAR11 cluster; Candidatus Pelagibacter. Candidatus Pelagibacter ubique HTCC1062 | 3.00E-120 | 88.54            |
| 1669 | Bacteria; Proteobacteria; Alphaproteobacteria; Rickettsiales; SAR11 cluster; Candidatus Pelagibacter. Candidatus Pelagibacter ubique HTCC1062 | 0         | 95.71            |
| 1670 | Bacteria; Proteobacteria; Gammaproteobacteria; Alteromonadales; Pseudoalteromonadaceae; Pseudoalteromonas. Pseudoalteromonas tunicata D2      | 6.00E-156 | 90.93            |
| 1671 | Bacteria; Proteobacteria; Deltaproteobacteria; Desulfuromonadales; Geobacteraceae; Geobacter. Geobacter sp. FRC-32                            | 1.00E-113 | 90.23            |
| 1676 | Bacteria; Bacteroidetes; Flavobacteria; Flavobacteriales; Flavobacteriaceae; Polaribacter. Polaribacter sp. MED152                            | 2.00E-137 | 88.91            |
| 1682 | Bacteria; Bacteroidetes; Flavobacteria; Flavobacteriales; Flavobacteriaceae; Robiginitalea. Robiginitalea biformata HTCC2501                  | 2.00E-177 | 92.42            |
| 1685 | Bacteria; Proteobacteria; Deltaproteobacteria; Desulfuromonadales; Geobacteraceae; Geobacter. Geobacter sp. FRC-32                            | 4.00E-157 | 90.65            |
| 1686 | Bacteria; Proteobacteria; Alphaproteobacteria; SAR116 cluster; Candidatus Puniceispirillum. Candidatus Puniceispirillum marinum IMCC1322      | 0         | 97.83            |
| 1691 | Bacteria; Proteobacteria; Alphaproteobacteria; Rickettsiales; SAR11 cluster; Candidatus Pelagibacter. Candidatus Pelagibacter ubique HTCC1002 | 1.00E-144 | 95.18            |
| 1692 | Bacteria; Proteobacteria; Gammaproteobacteria; Chromatiales; Halothiobacillaceae; Halothiobacillus. Halothiobacillus neapolitanus c2          | 1.00E-104 | 88.74            |
| 1694 | Bacteria; Verrucomicrobia; Opiritae; Puniceicoccales; Puniceicoccales; Coraliomargarita. Coraliomargarita akajimensis DSM 45221               | 2.00E-75  | 92.13            |
| 1695 | Bacteria; Proteobacteria; Gammaproteobacteria; Alteromonadales; Alteromonadaceae; Saccharophagus. Saccharophagus degradans 2-40               | 7.00E-131 | 88.4             |
| 1697 | Bacteria; Cyanobacteria; Prochlorales; Prochlorococcales; Prochlorococcus. Prochlorococcus marinus str. MIT 9202                              | 2.00E-127 | 96.89            |
| 1698 | Bacteria; Cyanobacteria; Chroococcales; Synechococcus. Synechococcus sp. WH 5701                                                              | 5.00E-141 | 93.71            |
| 1699 | Bacteria; Verrucomicrobia; Opiritae; Opiritales; Opiritaceae; Opiritus. Opiritus terrae PB90-1                                                | 6.00E-73  | 91.67            |
| 1704 | Bacteria; Proteobacteria; Alphaproteobacteria; Rickettsiales; SAR11 cluster; Candidatus Pelagibacter. Candidatus Pelagibacter ubique HTCC1062 | 0         | 95.01            |
| 1705 | Bacteria; Proteobacteria; Deltaproteobacteria; Desulfuromonadales; Geobacteraceae; Geobacter. Geobacter sp. FRC-32                            | 7.00E-165 | 90.64            |
| 1710 | Bacteria; Cyanobacteria; Chroococcales; Synechococcus. Synechococcus sp. BL107                                                                | 0         | 100              |
| 1711 | Bacteria; Proteobacteria; Gammaproteobacteria; Alteromonadales; Shewanellaceae; Shewanella. Shewanella sp. ANA-3                              | 3.00E-105 | 89.14            |
| 1712 | Bacteria; Proteobacteria; Alphaproteobacteria; SAR116 cluster; Candidatus Puniceispirillum. Candidatus Puniceispirillum marinum IMCC1322      | 0         | 93.04            |
| 1713 | Bacteria; Proteobacteria; Gammaproteobacteria; Legionellales; Legionellaceae; Legionella. Legionella pneumophila 2300/99 Alcoy                | 1.00E-104 | 86.3             |
| 1718 | Bacteria; Proteobacteria; Gammaproteobacteria; Alteromonadales; Shewanellaceae; Shewanella. Shewanella oneidensis MR-1                        | 1.00E-119 | 87.34            |
| 1719 | Bacteria; Proteobacteria; Gammaproteobacteria; Pseudomonadales; Pseudomonadaceae; Pseudomonas. Pseudomonas aeruginosa 39016                   | 1.00E-138 | 88.59            |
| 1721 | Bacteria; Proteobacteria; Alphaproteobacteria; Rickettsiales; SAR11 cluster; Candidatus Pelagibacter. Candidatus Pelagibacter ubique HTCC1062 | 0         | 94.77            |
| 1722 | Bacteria; Proteobacteria; Gammaproteobacteria; Alteromonadales; Shewanellaceae; Shewanella. Shewanella woodyi ATCC 51908                      | 5.00E-138 | 89.06            |
| 1724 | Bacteria; Actinobacteria; Actinobacteridae; Actinomycetales; Frankineae; Frankiaceae; Frankia. Frankia sp. Eu1c                               | 1.00E-88  | 87.14            |
| 1725 | Bacteria; Proteobacteria; Alphaproteobacteria; Rickettsiales; SAR11 cluster; Candidatus Pelagibacter. Candidatus Pelagibacter ubique HTCC1002 | 9.00E-121 | 93.51            |
| 1730 | Bacteria; Proteobacteria; Alphaproteobacteria; Rhodobacteriales; Rhodobacteraceae; Octadecabacter. Octadecabacter antarcticus 238             | 0         | 96.38            |
| 1734 | Bacteria; Proteobacteria; Deltaproteobacteria; Desulfovibrionales; Desulfomicrobiaceae; Desulfomicrobium. Desulfomicrobium baculatum DSM 4028 | 4.00E-129 | 88.07            |
| 1737 | Bacteria; Proteobacteria; Deltaproteobacteria; Desulfobacterales; Desulfobulbaceae; Desulfobulbus. Desulfobulbus propionicus DSM 2032         | 4.00E-117 | 90.57            |
| 1742 | Bacteria; Proteobacteria; Alphaproteobacteria; SAR116 cluster; Candidatus Puniceispirillum. Candidatus Puniceispirillum marinum IMCC1322      | 0         | 96.72            |
| 1747 | Bacteria; Proteobacteria; Gammaproteobacteria; Chromatiales; Halothiobacillaceae; Halothiobacillus. Halothiobacillus neapolitanus c2          | 2.00E-91  | 87.75            |
| 1757 | Bacteria; Planctomycetes; Planctomycetacia; Planctomycetales; Planctomycetaceae; Rhodopirellula. Rhodopirellula baltica SH 1                  | 7.00E-128 | 87.9             |
| 1759 | Bacteria; Proteobacteria; Gammaproteobacteria; Oceanospirillales; Hahellaceae; Hahella. Hahella chejuensis KCTC 2396                          | 9.00E-124 | 89.02            |

| OTU  | Phylogeny of best BLAST hit (refseq_genomic)                                                                                                                      | e value   | percent identity |
|------|-------------------------------------------------------------------------------------------------------------------------------------------------------------------|-----------|------------------|
| 1760 | Bacteria; Proteobacteria; Gammaproteobacteria; Methylococcales; Methylococcaceae; Methylococcus. <i>Methylococcus capsulatus</i> str. Bath                        | 0         | 93.2             |
| 1762 | Bacteria; Proteobacteria; Deltaproteobacteria; Desulfuromonadales; Geobacteraceae; Geobacter. <i>Geobacter</i> sp. FRC-32                                         | 2.00E-115 | 90.57            |
| 1765 | Bacteria; Proteobacteria; Alphaproteobacteria; SAR116 cluster; Candidatus Puniceispirillum. <i>Candidatus Puniceispirillum marinum</i> IMCC1322                   | 7.00E-134 | 92.77            |
| 1768 | Bacteria; Proteobacteria; Gammaproteobacteria; Legionellales; Legionellaceae; Legionella. <i>Legionella pneumophila</i> 2300/99 Alcoy                             | 1.00E-113 | 90.6             |
| 1772 | Bacteria; Proteobacteria; Gammaproteobacteria; Alteromonadales; Shewanellaceae; Shewanella. <i>Shewanella baltica</i> OS223                                       | 2.00E-143 | 89.96            |
| 1773 | Bacteria; Cyanobacteria; Prochlorales; Prochlorococcaceae; Prochlorococcus. <i>Prochlorococcus marinus</i> str. MIT 9202                                          | 4.00E-141 | 95.82            |
| 1776 | Bacteria; Proteobacteria; Gammaproteobacteria; Legionellales; Coxiellaceae; Coxiella. <i>Coxiella burnetii</i> CbuK_Q154                                          | 4.00E-117 | 90.57            |
| 1778 | Bacteria; Proteobacteria; Alphaproteobacteria; Rickettsiales; SAR11 cluster. <i>alpha proteobacterium</i> HIMB114                                                 | 0         | 98.27            |
| 1782 | Bacteria; Proteobacteria; Alphaproteobacteria; Rickettsiales; SAR11 cluster; Candidatus Pelagibacter. <i>Candidatus Pelagibacter ubique</i> HTCC1002              | 5.00E-110 | 89.83            |
| 1789 | Bacteria; Bacteroidetes; Flavobacteria; Flavobacteriales; Flavobacteriaceae; Flavobacterium. <i>Flavobacterium psychrophilum</i> JIPO2/86                         | 9.00E-133 | 92.53            |
| 1790 | Bacteria; Chloroflexi; Dehalococcoidetes; Dehalogenimonas. <i>Dehalogenimonas lykanthroporepellens</i> BL-DC-9                                                    | 9.00E-44  | 86.79            |
| 1791 | Bacteria; Thermobaculum. <i>Thermobaculum terrenum</i> ATCC BAA-798                                                                                               | 8.00E-103 | 89.88            |
| 1793 | Bacteria; Proteobacteria; Alphaproteobacteria; Rhizobiales; Brucellaceae; Brucella. <i>Brucella abortus</i> bv. 5 str. B3196                                      | 4.00E-157 | 90.89            |
| 1796 | Bacteria; Proteobacteria; Alphaproteobacteria; SAR116 cluster; Candidatus Puniceispirillum. <i>Candidatus Puniceispirillum marinum</i> IMCC1322                   | 4.00E-157 | 91.76            |
| 1798 | Bacteria; Cyanobacteria; Prochlorales; Prochlorococcaceae; Prochlorococcus. <i>Prochlorococcus marinus</i> str. NATL2A                                            | 1.00E-91  | 99.45            |
| 1799 | Bacteria; Proteobacteria; Gammaproteobacteria; Pseudomonadales; Pseudomonadaceae; Pseudomonas; Pseudomonas syringae. <i>Pseudomonas syringae</i> pv. syringae FF5 | 0         | 94.8             |
| 1804 | Bacteria; Cyanobacteria; Chroococcales; Synechococcus. <i>Synechococcus</i> sp. WH 8109                                                                           | 4.00E-80  | 83.88            |
| 1805 | Bacteria; Proteobacteria; Alphaproteobacteria; Rhizobiales; Brucellaceae; Ochrobactrum. <i>Ochrobactrum anthropi</i> ATCC 49188                                   | 0         | 94.24            |
| 1808 | Bacteria; Actinobacteria; Actinobacteridae; Actinomycetales; Corynebacterineae; Nocardiaceae; Rhodococcus. <i>Rhodococcus jostii</i> RHA1                         | 2.00E-109 | 89.97            |
| 1810 | Bacteria; Actinobacteria; Actinobacteridae; Actinomycetales; Propionibacterineae; Nocardioidaceae; Kribbella. <i>Kribbella flavida</i> DSM 17836                  | 5.00E-147 | 89.47            |
| 1811 | Bacteria; Proteobacteria; Alphaproteobacteria; Rhodobacterales; Rhodobacteraceae; Pelagibaca. <i>Pelagibaca bermudensis</i> HTCC2601                              | 0         | 97.84            |
| 1821 | Bacteria; Proteobacteria; Gammaproteobacteria; Legionellales; Coxiellaceae; Coxiella. <i>Coxiella burnetii</i> CbuG_Q212                                          | 2.00E-165 | 92.02            |
| 1823 | Bacteria; Proteobacteria; Deltaproteobacteria; Desulfovibrionales; Desulfomicrobiaceae; Desulfomicrobium. <i>Desulfomicrobium baculatum</i> DSM 4028              | 5.00E-135 | 88.31            |
| 1825 | Bacteria; Proteobacteria; Alphaproteobacteria; SAR116 cluster; Candidatus Puniceispirillum. <i>Candidatus Puniceispirillum marinum</i> IMCC1322                   | 9.00E-115 | 89.57            |
| 1831 | Bacteria; Cyanobacteria; Prochlorales; Prochlorococcaceae; Prochlorococcus. <i>Prochlorococcus marinus</i> str. MIT 9202                                          | 0         | 100              |
| 1832 | Bacteria; Cyanobacteria; Prochlorales; Prochlorococcaceae; Prochlorococcus. <i>Prochlorococcus marinus</i> str. MIT 9202                                          | 0         | 98.1             |
| 1833 | Bacteria; Proteobacteria; Gammaproteobacteria; Vibrionales; Vibrionaceae; Vibrio. <i>Vibrio harveyi</i> HY01                                                      | 0         | 96.91            |
| 1835 | Bacteria; Proteobacteria; Alphaproteobacteria; Rickettsiales; SAR11 cluster; Candidatus Pelagibacter. <i>Candidatus Pelagibacter</i> sp. HTCC7211                 | 7.00E-168 | 90.76            |
| 1838 | Bacteria; Chlamydiae; Chlamydiales; Chlamydiaceae; Chlamydia. <i>Chlamydia trachomatis</i> L2b/UCH-1/proctitis                                                    | 8.00E-72  | 85.71            |
| 1840 | Bacteria; Proteobacteria; Gammaproteobacteria; Legionellales; Coxiellaceae; Coxiella. <i>Coxiella burnetii</i> CbuK_Q154                                          | 1.00E-138 | 88.68            |
| 1843 | Bacteria; Proteobacteria; Gammaproteobacteria; Alteromonadales; Alteromonadaceae; Saccharophagus. <i>Saccharophagus degradans</i> 2-40                            | 0         | 96.23            |
| 1844 | Bacteria; Cyanobacteria; Prochlorales; Prochlorococcaceae; Prochlorococcus. <i>Prochlorococcus marinus</i> str. NATL2A                                            | 1.00E-98  | 88.57            |
| 1853 | Bacteria; Planctomycetes; Planctomycetacia; Planctomycetales; Planctomycetaceae; Planctomyces. <i>Planctomyces brasiliensis</i> DSM 5305                          | 4.00E-89  | 88.38            |
| 1858 | Bacteria; Proteobacteria; Alphaproteobacteria; Rickettsiales; SAR11 cluster; Candidatus Pelagibacter. <i>Candidatus Pelagibacter</i> sp. HTCC7211                 | 1.00E-160 | 91.1             |
| 1863 | Bacteria; Proteobacteria; Deltaproteobacteria; Myxococcales; Cystobacterineae; Myxococcaceae; Anaeromyxobacter. <i>Anaeromyxobacter</i> sp. Fw109-5               | 2.00E-106 | 89.66            |
| 1866 | Bacteria; Proteobacteria; Gammaproteobacteria; Alteromonadales; Shewanellaceae; Shewanella. <i>Shewanella baltica</i> OS223                                       | 9.00E-152 | 90               |
| 1868 | Bacteria; Cyanobacteria; Prochlorales; Prochlorococcaceae; Prochlorococcus. <i>Prochlorococcus marinus</i> str. NATL2A                                            | 3.00E-154 | 99.65            |
| 1874 | Bacteria; Cyanobacteria; Prochlorales; Prochlorococcaceae; Prochlorococcus. <i>Prochlorococcus marinus</i> str. MIT 9202                                          | 0         | 95.83            |
| 1875 | Bacteria; Cyanobacteria; Prochlorales; Prochlorococcaceae; Prochlorococcus. <i>Prochlorococcus marinus</i> str. MIT 9515                                          | 6.00E-103 | 98.57            |
| 1876 | Bacteria; Cyanobacteria; Prochlorales; Prochlorococcaceae; Prochlorococcus. <i>Prochlorococcus marinus</i> subsp. <i>marinus</i> str. CCMP1375                    | 0         | 99.42            |
| 1878 | Bacteria; Cyanobacteria; Prochlorales; Prochlorococcaceae; Prochlorococcus. <i>Prochlorococcus marinus</i> str. MIT 9202                                          | 3.00E-133 | 99.6             |

| OTU  | Phylogeny of best BLAST hit (refseq_genomic)                                                                                                                    | e value   | percent identity |
|------|-----------------------------------------------------------------------------------------------------------------------------------------------------------------|-----------|------------------|
| 1883 | Bacteria; Proteobacteria; Alphaproteobacteria; Rickettsiales; SAR11 cluster; Candidatus Pelagibacter. Candidatus Pelagibacter sp. HTCC7211                      | 8.00E-180 | 91.58            |
| 1885 | Bacteria; Proteobacteria; Gammaproteobacteria; Pseudomonadales; Pseudomonadaceae; Cellvibrio. Cellvibrio japonicus Ueda107                                      | 0         | 93.5             |
| 1894 | Bacteria; Proteobacteria; Gammaproteobacteria; Methylococcales; Methylococcaceae; Methylococcus. Methylococcus capsulatus str. Bath                             | 3.00E-127 | 91.74            |
| 1896 | Bacteria; Proteobacteria; Deltaproteobacteria; Desulfuromonadales; Pelobacteraceae; Pelobacter. Pelobacter carbinolicus DSM 2380                                | 1.00E-110 | 90               |
| 1897 | Bacteria; Firmicutes; Clostridia; Clostridiales; Clostridiaceae; Clostridium. Clostridium kluyveri NBRC 12016                                                   | 5.00E-64  | 84.24            |
| 1902 | Bacteria; Proteobacteria; Alphaproteobacteria; Rickettsiales; SAR11 cluster; Candidatus Pelagibacter. Candidatus Pelagibacter sp. HTCC7211                      | 2.00E-109 | 90.48            |
| 1903 | Bacteria; Bacteroidetes; Cytophagia; Cytophagales; Flammeovirgaceae; Marivirga. Marivirga tractuosa DSM 4126                                                    | 8.00E-140 | 93.18            |
| 1905 | Bacteria; Proteobacteria; Alphaproteobacteria; Sphingomonadales; Erythrobacteraceae; Erythrobacter. Erythrobacter sp. NAP1                                      | 0         | 97.49            |
| 1910 | Bacteria; Proteobacteria; Alphaproteobacteria; Rickettsiales; SAR11 cluster; Candidatus Pelagibacter. Candidatus Pelagibacter sp. HTCC7211                      | 0         | 95.57            |
| 1913 | Bacteria; Proteobacteria; Alphaproteobacteria; Rickettsiales; SAR11 cluster; Candidatus Pelagibacter. Candidatus Pelagibacter ubique HTCC1002                   | 1.00E-125 | 89.81            |
| 1915 | Bacteria; Proteobacteria; Alphaproteobacteria; Rhodospirillales; Acetobacteraceae; Acetobacter. Acetobacter pasteurianus IFO 3283-01                            | 2.00E-81  | 86.16            |
| 1918 | Bacteria; Proteobacteria; Alphaproteobacteria; SAR116 cluster; Candidatus Puniceispirillum. Candidatus Puniceispirillum marinum IMCC1322                        | 0         | 93.1             |
| 1920 | Bacteria; Actinobacteria; Actinobacteridae; Actinomycetales; Micrococciaceae; Intrasporangiaceae; Intrasporangium. Intrasporangium calvum DSM 43043             | 2.00E-103 | 88.89            |
| 1927 | Bacteria; Proteobacteria; Gammaproteobacteria; Oceanospirillales; Hahellaceae; Hahella. Hahella chejuensis KCTC 2396                                            | 3.00E-176 | 92.62            |
| 1930 | Bacteria; Proteobacteria; Epsilonproteobacteria; Nitratiruptor. Nitratiruptor sp. SB155-2                                                                       | 6.00E-153 | 89.92            |
| 1937 | Bacteria; Proteobacteria; Alphaproteobacteria; Rickettsiales; SAR11 cluster; Candidatus Pelagibacter. Candidatus Pelagibacter ubique HTCC1002                   | 3.00E-151 | 90.95            |
| 1944 | Bacteria; Bacteroidetes; Cytophagia; Cytophagales; Cytophagaceae; Cytophaga. Cytophaga hutchinsonii ATCC 33406                                                  | 9.00E-118 | 90.88            |
| 1945 | Bacteria; Cyanobacteria; Chroococcales; Synechococcus. Synechococcus sp. WH 5701                                                                                | 0         | 94.03            |
| 1949 | Bacteria; Actinobacteria; Actinobacteridae; Actinomycetales; Frankineae; Acidothermaceae; Acidothermus. Acidothermus cellulolyticus 11B                         | 0         | 93.01            |
| 1952 | Bacteria; Proteobacteria; Deltaproteobacteria; Desulfuromonadales; Pelobacteraceae; Pelobacter. Pelobacter propionicus DSM 2379                                 | 5.00E-172 | 90.95            |
| 1953 | Bacteria; Proteobacteria; Gammaproteobacteria. gamma proteobacterium NOR5-3                                                                                     | 4.00E-86  | 88.71            |
| 1960 | Bacteria; Proteobacteria; Gammaproteobacteria; Pseudomonadales; Pseudomonadaceae; Cellvibrio. Cellvibrio japonicus Ueda107                                      | 1.00E-116 | 87.64            |
| 1961 | Eukaryota; Alveolata; Apicomplexa; Aconoidasida; Haemosporida; Plasmodium; Plasmodium (Vinckeia). Plasmodium yoelii yoelii str. 17XNL                           | 5.00E-138 | 88.25            |
| 1965 | Bacteria; Proteobacteria; Alphaproteobacteria; Rickettsiales; Anaplasmataceae; Ehrlichia. Ehrlichia chaffeensis str. Arkansas                                   | 7.00E-88  | 87.11            |
| 1966 | Bacteria; Proteobacteria; Alphaproteobacteria; Rhodospirillales; Rhodospirillaceae; Magnetospirillum. Magnetospirillum magneticum AMB-1                         | 3.00E-114 | 90.62            |
| 1968 | Bacteria; Proteobacteria; Alphaproteobacteria; Rickettsiales; SAR11 cluster; Candidatus Pelagibacter. Candidatus Pelagibacter sp. HTCC7211                      | 0         | 97.83            |
| 1969 | Bacteria; Proteobacteria; Deltaproteobacteria; Desulfuromonadales; Geobacteraceae; Geobacter. Geobacter metallireducens GS-15                                   | 2.00E-168 | 91.19            |
| 1975 | Bacteria; Proteobacteria; Gammaproteobacteria; Alteromonadales; Shewanellaceae; Shewanella. Shewanella oneidensis MR-1                                          | 3.00E-136 | 89.21            |
| 1980 | Bacteria; Proteobacteria; Alphaproteobacteria; Rickettsiales; SAR11 cluster; Candidatus Pelagibacter. Candidatus Pelagibacter sp. HTCC7211                      | 0         | 94.05            |
| 1984 | Bacteria; Bacteroidetes; Flavobacteria; Flavobacteriales; Flavobacteriaceae; Polaribacter. Polaribacter sp. MED152                                              | 2.00E-125 | 87.61            |
| 1986 | Bacteria; Proteobacteria; Gammaproteobacteria; Alteromonadales; Shewanellaceae; Shewanella. Shewanella baltica OS223                                            | 1.00E-83  | 86.86            |
| 1990 | Bacteria; Proteobacteria; Gammaproteobacteria. gamma proteobacterium NOR51-B                                                                                    | 0         | 94.05            |
| 1991 | Bacteria; Planctomycetes; Planctomycetacia; Planctomycetales; Planctomycetaceae; Blastopirellula. Blastopirellula marina DSM 3645                               | 3.00E-65  | 84.62            |
| 1993 | Bacteria; Proteobacteria; Gammaproteobacteria; Pasteurellales; Pasteurellaceae; Aggregatibacter. Aggregatibacter aphrophilus NJ8700                             | 9.00E-149 | 89.14            |
| 1997 | Bacteria; Proteobacteria; Deltaproteobacteria; Desulfuromonadales; Geobacteraceae; Geobacter. Geobacter bemidjensis Bem                                         | 3.00E-136 | 89.3             |
| 1998 | Bacteria; Proteobacteria; Gammaproteobacteria; OMG group; SAR92 clade. gamma proteobacterium HTCC2207                                                           | 0         | 95.63            |
| 1999 | Bacteria; Firmicutes; Lactobacillales; Lactobacillaceae; Lactobacillus. Lactobacillus hilgardii ATCC 8290                                                       | 2.00E-79  | 86.61            |
| 2001 | Bacteria; Proteobacteria; Gammaproteobacteria; Alteromonadales; Shewanellaceae; Shewanella. Shewanella sp. MR-7                                                 | 0         | 92.18            |
| 2002 | Bacteria; Proteobacteria; Gammaproteobacteria; Legionellales; Coxiellaceae; Coxiella. Coxiella burnetii CbuG_Q212                                               | 4.00E-154 | 90.65            |
| 2003 | Bacteria; Proteobacteria; Gammaproteobacteria; Pseudomonadales; Pseudomonadaceae; Pseudomonas; Pseudomonas amygdali. Pseudomonas syringae pv. tabaci ATCC 11528 | 1.00E-129 | 92.71            |
| 2006 | Bacteria; Proteobacteria; Gammaproteobacteria; OMG group; SAR92 clade. gamma proteobacterium HTCC2207                                                           | 0         | 94.49            |



| OTU  | Phylogeny of best BLAST hit (refseq_genomic)                                                                                                                 | e value   | percent identity |
|------|--------------------------------------------------------------------------------------------------------------------------------------------------------------|-----------|------------------|
| 2008 | Bacteria; Bacteroidetes; Flavobacteria; Flavobacteriales; Flavobacteriaceae; Zunongwangia. Zunongwangia profunda SM-A87                                      | 9.00E-152 | 90               |
| 2009 | Bacteria; Proteobacteria; Gammaproteobacteria. gamma proteobacterium NOR51-B                                                                                 | 1.00E-79  | 86.61            |
| 2011 | Bacteria; Proteobacteria; Deltaproteobacteria; Desulfuromonadales; Pelobacteraceae; Pelobacter. Pelobacter carbinolicus DSM 2380                             | 7.00E-94  | 88               |
| 2016 | Bacteria; Proteobacteria; Gammaproteobacteria; Pseudomonadales; Pseudomonadaceae; Pseudomonas. Pseudomonas fluorescens Pf-5                                  | 3.00E-176 | 91.8             |
| 2017 | Bacteria; Proteobacteria; Gammaproteobacteria. gamma proteobacterium NOR51-B                                                                                 | 9.00E-75  | 86.32            |
| 2022 | Bacteria; Proteobacteria; Alphaproteobacteria; SAR116 cluster; Candidatus Puniceispirillum. Candidatus Puniceispirillum marinum IMCC1322                     | 0         | 97.62            |
| 2028 | Bacteria; Proteobacteria; Gammaproteobacteria; Chromatiales; Halothiobacillaceae; Halothiobacillus. Halothiobacillus neapolitanus c2                         | 4.00E-83  | 87.07            |
| 2033 | Bacteria; Proteobacteria; Deltaproteobacteria; Desulfovibrionales; Desulfomicrobiaceae; Desulfomicrobium. Desulfomicrobium baculatum DSM 4028                | 1.00E-64  | 84.29            |
| 2034 | Bacteria; Proteobacteria; Alphaproteobacteria; Rhizobiales; Rhizobiaceae; Sinorhizobium/Ensifer group; Sinorhizobium. Sinorhizobium fredii NGR234            | 1.00E-83  | 87.71            |
| 2036 | Bacteria; Proteobacteria; Gammaproteobacteria; Alteromonadales; Shewanellaceae; Shewanella. Shewanella baltica OS223                                         | 1.00E-166 | 90.99            |
| 2037 | Bacteria; Cyanobacteria; Prochlorales; Prochlorococcaceae; Prochlorococcus. Prochlorococcus marinus str. MIT 9202                                            | 1.00E-159 | 99.66            |
| 2040 | Bacteria; Bacteroidetes; Bacteroidia; Bacteroidales; Rikenellaceae; Alistipes. Alistipes putredinis DSM 17216                                                | 3.00E-65  | 81.89            |
| 2041 | Bacteria; Proteobacteria; Deltaproteobacteria; Desulfuromonadales; Geobacteraceae; Geobacter. Geobacter uraniireducens Rf4                                   | 6.00E-94  | 89.05            |
| 2050 | Bacteria; Proteobacteria; Gammaproteobacteria; Chromatiales; Halothiobacillaceae; Halothiobacillus. Halothiobacillus neapolitanus c2                         | 4.00E-89  | 87.75            |
| 2052 | Bacteria; Chloroflexi; Dehalococcoidetes; Dehalogenimonas. Dehalogenimonas lykanthroporepellens BL-DC-9                                                      | 2.00E-63  | 85.13            |
| 2055 | Bacteria; Proteobacteria; Deltaproteobacteria; Desulfuromonadales; Pelobacteraceae; Pelobacter. Pelobacter carbinolicus DSM 2380                             | 4.00E-120 | 90.88            |
| 2057 | Bacteria; Proteobacteria; Alphaproteobacteria; SAR116 cluster; Candidatus Puniceispirillum. Candidatus Puniceispirillum marinum IMCC1322                     | 0         | 93.68            |
| 2070 | Bacteria; Cyanobacteria; Prochlorales; Prochlorococcaceae; Prochlorococcus. Prochlorococcus marinus str. MIT 9202                                            | 7.00E-177 | 97.81            |
| 2075 | Bacteria; Proteobacteria; Alphaproteobacteria; Rickettsiales; SAR11 cluster; Candidatus Pelagibacter. Candidatus Pelagibacter sp. HTCC7211                   | 0         | 98.12            |
| 2076 | Bacteria; Proteobacteria; Alphaproteobacteria; SAR116 cluster; Candidatus Puniceispirillum. Candidatus Puniceispirillum marinum IMCC1322                     | 1.00E-178 | 92.41            |
| 2077 | Bacteria; Bacteroidetes; Cytophagia; Cytophagales; Flammeovirgaceae; Marivirga. Marivirga tractuosa DSM 4126                                                 | 2.00E-122 | 91.17            |
| 2086 | Bacteria; Firmicutes; Clostridia; Clostridiales; Clostridiaceae; Clostridium. Clostridium kluyveri NBRC 12016                                                | 9.00E-69  | 84.81            |
| 2093 | Bacteria; Actinobacteria; Actinobacteridae; Actinomycetales; Propionibacterineae; Nocardioideae; Kribbella. Kribbella flavida DSM 17836                      | 4.00E-89  | 87.46            |
| 2096 | Bacteria; Proteobacteria; Alphaproteobacteria; Rhodobacterales; Rhodobacteraceae. Rhodobacteraceae bacterium HTCC2083                                        | 0         | 98.7             |
| 2098 | Bacteria; Proteobacteria; Alphaproteobacteria; Rickettsiales; SAR11 cluster; Candidatus Pelagibacter. Candidatus Pelagibacter sp. HTCC7211                   | 0         | 98.36            |
| 2104 | Bacteria; Cyanobacteria; Prochlorales; Prochlorococcaceae; Prochlorococcus. Prochlorococcus marinus str. NATL2A                                              | 0         | 98.21            |
| 2105 | Bacteria; Actinobacteria; Actinobacteridae; Actinomycetales; Frankineae; Geodermatophilaceae; Geodermatophilus. Geodermatophilus obscurus DSM 43160          | 2.00E-155 | 90.46            |
| 2107 | Bacteria; Proteobacteria; Deltaproteobacteria; Desulfuromonadales; Pelobacteraceae; Pelobacter. Pelobacter propionicus DSM 2379                              | 1.00E-123 | 87.83            |
| 2108 | Bacteria; Proteobacteria; Zetaproteobacteria; Mariprofundales; Mariprofundaceae; Mariprofundus. Mariprofundus ferrooxydans PV-1                              | 4.00E-114 | 90.26            |
| 2112 | Bacteria; Firmicutes; Bacillales; Listeriaceae; Listeria. Listeria seeligeri serovar 1/2b str. SLCC3954                                                      | 7.00E-125 | 87.76            |
| 2115 | Bacteria; Proteobacteria; Alphaproteobacteria; Rickettsiales; SAR11 cluster; Candidatus Pelagibacter. Candidatus Pelagibacter ubique HTCC1002                | 4.00E-154 | 90.25            |
| 2116 | Bacteria; Firmicutes; Bacillales; Bacillaceae; Bacillus. Bacillus licheniformis ATCC 14580                                                                   | 2.00E-128 | 88.48            |
| 2120 | Bacteria; Proteobacteria; Alphaproteobacteria; Rhizobiales; Phyllobacteriaceae; Mesorhizobium. Mesorhizobium ciceri biovar biserrulae WSM1271                | 3.00E-142 | 90.43            |
| 2133 | Bacteria; Cyanobacteria; Prochlorales; Prochlorococcaceae; Prochlorococcus. Prochlorococcus marinus str. MIT 9202                                            | 2.00E-121 | 99.14            |
| 2135 | Bacteria; Proteobacteria; Alphaproteobacteria; Rickettsiales; Rickettsiaceae; Rickettsieae; Rickettsia; spotted fever group. Rickettsia rickettsii str. Iowa | 6.00E-97  | 88.89            |
| 2137 | Bacteria; Proteobacteria; Alphaproteobacteria; Rickettsiales; SAR11 cluster; Candidatus Pelagibacter. Candidatus Pelagibacter sp. HTCC7211                   | 0         | 98.36            |
| 2140 | Bacteria; Proteobacteria; Zetaproteobacteria; Mariprofundales; Mariprofundaceae; Mariprofundus. Mariprofundus ferrooxydans PV-1                              | 2.00E-128 | 88.26            |
| 2146 | Bacteria; Cyanobacteria; Prochlorales; Prochlorococcaceae; Prochlorococcus. Prochlorococcus marinus str. NATL2A                                              | 0         | 94.8             |
| 2147 | Bacteria; Proteobacteria; Gammaproteobacteria; Legionellales; Coxiellaceae; Coxiella. Coxiella burnetii CbuK_Q154                                            | 1.00E-141 | 93.19            |
| 2148 | Bacteria; Proteobacteria; Gammaproteobacteria; Alteromonadales; Colwelliaceae; Colwellia. Colwellia psychrerythraea 34H                                      | 5.00E-135 | 88.73            |
| 2149 | Bacteria; Proteobacteria; Alphaproteobacteria; Rhodobacterales; Rhodobacteraceae; Thalassobium. Thalassobium sp. R2A62                                       | 9.00E-155 | 90.81            |
| 2154 | Bacteria; Proteobacteria; Gammaproteobacteria; Chromatiales; Halothiobacillaceae; Halothiobacillus. Halothiobacillus neapolitanus c2                         | 3.00E-96  | 88.6             |

| OTU  | Phylogeny of best BLAST hit (refseq_genomic)                                                                                                           | e value   | percent identity |
|------|--------------------------------------------------------------------------------------------------------------------------------------------------------|-----------|------------------|
| 2155 | Bacteria; Proteobacteria; Gammaproteobacteria; Legionellales; Legionellaceae; Legionella. Legionella drancourtii LLAP12                                | 5.00E-104 | 89.37            |
| 2158 | Bacteria; Proteobacteria; Gammaproteobacteria; Alteromonadales; Psychromonadaceae; Psychromonas. Psychromonas ingrahamii 37                            | 1.00E-150 | 89.73            |
| 2159 | Bacteria; Proteobacteria; Alphaproteobacteria; Rickettsiales; SAR11 cluster; Candidatus Pelagibacter. Candidatus Pelagibacter ubique HTCC1062          | 2.00E-168 | 90.76            |
| 2160 | Bacteria; Proteobacteria; Alphaproteobacteria; Rickettsiales; SAR11 cluster; Candidatus Pelagibacter. Candidatus Pelagibacter ubique HTCC1002          | 0         | 92.42            |
| 2164 | Bacteria; Cyanobacteria; Prochlorales; Prochlorococcaceae; Prochlorococcus. Prochlorococcus marinus str. NATL2A                                        | 3.00E-145 | 96.72            |
| 2165 | Bacteria; Actinobacteria; Actinobacteridae; Actinomycetales; Frankineae; Nakamurellaceae; Nakamurella. Nakamurella multipartita DSM 44233              | 3.00E-96  | 88.32            |
| 2170 | Bacteria; Proteobacteria; Alphaproteobacteria; Rhodobacterales; Rhodobacteraceae; Rhodobacter. Rhodobacter sphaeroides KD131                           | 2.00E-158 | 91.87            |
| 2172 | Bacteria; Verrucomicrobia; Opiritae; Opiritales; Opiritaceae; Opiritus. Opiritus terrae PB90-1                                                         | 1.00E-86  | 94.79            |
| 2173 | Bacteria; Proteobacteria; Gammaproteobacteria; Oceanospirillales; Hahellaceae; Hahella. Hahella chejuensis KCTC 2396                                   | 0         | 94.58            |
| 2174 | Bacteria; Firmicutes; Clostridia; Clostridiales; Clostridiaceae; Clostridium. Clostridium difficile QCD-66c26                                          | 6.00E-48  | 86.7             |
| 2175 | Bacteria; Cyanobacteria; Prochlorales; Prochlorococcaceae; Prochlorococcus. Prochlorococcus marinus str. MIT 9202                                      | 0         | 99.71            |
| 2179 | Bacteria; Firmicutes; Bacillales; Bacillaceae; Bacillus. Bacillus atrophaeus 1942                                                                      | 3.00E-136 | 88.27            |
| 2180 | Bacteria; Proteobacteria; Alphaproteobacteria; Rickettsiales; SAR11 cluster. alpha proteobacterium HIMB114                                             | 0         | 99.14            |
| 2182 | Bacteria; Proteobacteria; Gammaproteobacteria; Pseudomonadales; Pseudomonadaceae; Cellvibrio. Cellvibrio japonicus Ueda107                             | 1.00E-64  | 84.57            |
| 2184 | Bacteria; Proteobacteria; Gammaproteobacteria; Alteromonadales; Shewanellaceae; Shewanella. Shewanella oneidensis MR-1                                 | 6.00E-79  | 86               |
| 2185 | Bacteria; Proteobacteria; Gammaproteobacteria; Chromatiales; Ectothiorhodospiraceae; Nitrococcus. Nitrococcus mobilis Nb-231                           | 2.00E-122 | 87.87            |
| 2187 | Bacteria; Proteobacteria; Gammaproteobacteria; Alteromonadales; Pseudoalteromonadaceae; Pseudoalteromonas. Pseudoalteromonas sp. SM9913                | 3.00E-148 | 94.57            |
| 2188 | Bacteria; Planctomycetes; Planctomycetacia; Planctomycetales; Planctomycetaceae; Planctomyces. Planctomyces brasiliensis DSM 5305                      | 1.00E-98  | 89.52            |
| 2190 | Bacteria; Proteobacteria; Alphaproteobacteria; SAR116 cluster; Candidatus Puniceispirillum. Candidatus Puniceispirillum marinum IMCC1322               | 3.00E-117 | 90.88            |
| 2192 | Bacteria; Proteobacteria; Deltaproteobacteria; Desulfuromonadales; Geobacteraceae; Geobacter. Geobacter sp. FRC-32                                     | 1.00E-86  | 87.14            |
| 2195 | Bacteria; Proteobacteria; Deltaproteobacteria; Desulfuromonadales; Geobacteraceae; Geobacter. Geobacter sp. FRC-32                                     | 2.00E-79  | 86.29            |
| 2200 | Bacteria; Cyanobacteria; Prochlorales; Prochlorococcaceae; Prochlorococcus. Prochlorococcus marinus str. MIT 9202                                      | 6.00E-127 | 96.67            |
| 2206 | Bacteria; Thermobaculum. Thermobaculum terrenum ATCC BAA-798                                                                                           | 2.00E-72  | 86.27            |
| 2207 | Bacteria; Proteobacteria; Alphaproteobacteria; Rickettsiales; SAR11 cluster; Candidatus Pelagibacter. Candidatus Pelagibacter sp. HTCC7211             | 1.00E-143 | 96.36            |
| 2209 | Bacteria; Bacteroidetes; Flavobacteria; Flavobacteriales; Flavobacteriaceae; Robiginitalea. Robiginitalea biformata HTCC2501                           | 0         | 93.06            |
| 2211 | Bacteria; Planctomycetes; Planctomycetacia; Planctomycetales; Planctomycetaceae; Planctomyces. Planctomyces brasiliensis DSM 5305                      | 2.00E-94  | 85.78            |
| 2213 | Bacteria; Cyanobacteria; Chroococcales; Synechococcus. Synechococcus sp. RS9917                                                                        | 0         | 93.26            |
| 2217 | Bacteria; Proteobacteria; Alphaproteobacteria; SAR116 cluster; Candidatus Puniceispirillum. Candidatus Puniceispirillum marinum IMCC1322               | 1.00E-107 | 89.71            |
| 2218 | Bacteria; Firmicutes; Bacillales; Paenibacillaceae; Paenibacillus. Paenibacillus sp. JDR-2                                                             | 3.00E-166 | 96.63            |
| 2229 | Bacteria; Proteobacteria; Alphaproteobacteria; Rickettsiales; Rickettsiaceae; Rickettsiae; Rickettsia; typhus group. Rickettsia canadensis str. McKiel | 6.00E-110 | 90.75            |
| 2239 | Bacteria; Proteobacteria; Deltaproteobacteria; Desulfuromonadales; Pelobacteraceae; Pelobacter. Pelobacter carbinolicus DSM 2380                       | 6.00E-116 | 90.91            |
| 2240 | Bacteria; Verrucomicrobia; Opiritae; Puniceococcales; Puniceococcaceae; Coraliomargarita. Coraliomargarita akajimensis DSM 45221                       | 0         | 96.65            |
| 2243 | Bacteria; Proteobacteria; Alphaproteobacteria; Rhizobiales; Phyllobacteriaceae; Mesorhizobium. Mesorhizobium loti MAFF303099                           | 1.00E-156 | 91.09            |
| 2245 | Bacteria; Verrucomicrobia; Opiritae; Puniceococcales; Puniceococcaceae; Coraliomargarita. Coraliomargarita akajimensis DSM 45221                       | 4.00E-80  | 93.06            |
| 2248 | Bacteria; Proteobacteria; Deltaproteobacteria; Desulfuromonadales; Pelobacteraceae; Pelobacter. Pelobacter carbinolicus DSM 2380                       | 2.00E-115 | 90.6             |
| 2252 | Bacteria; Cyanobacteria; Prochlorales; Prochlorococcaceae; Prochlorococcus. Prochlorococcus marinus str. NATL1A                                        | 5.00E-168 | 98.02            |
| 2253 | Bacteria; Cyanobacteria; Prochlorales; Prochlorococcaceae; Prochlorococcus. Prochlorococcus marinus str. MIT 9202                                      | 5.00E-156 | 99.66            |
| 2256 | Bacteria; Proteobacteria; Alphaproteobacteria; Rickettsiales; SAR11 cluster; Candidatus Pelagibacter. Candidatus Pelagibacter ubique HTCC1002          | 1.00E-122 | 91.35            |
| 2260 | Bacteria; Bacteroidetes; Cytophagia; Cytophagales; Cytophagaceae; Spirosoma. Spirosoma linguale DSM 74                                                 | 4.00E-98  | 88.29            |
| 2265 | Bacteria; Proteobacteria; Alphaproteobacteria; Rhodobacterales; Rhodobacteraceae; Oceanicola. Oceanicola batsensis HTCC2597                            | 0         | 96.11            |
| 2277 | Bacteria; Proteobacteria; Deltaproteobacteria; Desulfuromonadales; Geobacteraceae; Geobacter. Geobacter sp. M21                                        | 4.00E-154 | 95.16            |
| 2278 | Bacteria; Proteobacteria; Alphaproteobacteria; Rickettsiales; SAR11 cluster; Candidatus Pelagibacter. Candidatus Pelagibacter ubique HTCC1002          | 1.00E-141 | 93.66            |

| OTU  | Phylogeny of best BLAST hit (refseq_genomic)                                                                                                      | e value   | percent identity |
|------|---------------------------------------------------------------------------------------------------------------------------------------------------|-----------|------------------|
| 2282 | Bacteria; Proteobacteria; Alphaproteobacteria; Rickettsiales; SAR11 cluster; Candidatus Pelagibacter. Candidatus Pelagibacter sp. HTCC7211        | 0         | 94.42            |
| 2283 | Bacteria; Proteobacteria; Alphaproteobacteria; Rhodospirillales; Rhodospirillaceae; Rhodospirillum. Rhodospirillum rubrum ATCC 11170              | 8.00E-180 | 92.64            |
| 2284 | Bacteria; Proteobacteria; Gammaproteobacteria; Alteromonadales; Alteromonadaceae; Alteromonas. Alteromonas macleodii str. 'Deep ecotype'          | 2.00E-146 | 88.94            |
| 2286 | Bacteria; Bacteroidetes; Flavobacteria; Flavobacteriales; Flavobacteriaceae; Dokdonia. Dokdonia donghaensis MED134                                | 3.00E-114 | 92.46            |
| 2287 | Bacteria; Proteobacteria; Deltaproteobacteria; Desulfuromonadales; Pelobacteraceae; Pelobacter. Pelobacter carbinolicus DSM 2380                  | 2.00E-94  | 87.6             |
| 2290 | Bacteria; Cyanobacteria; Prochlorales; Prochlorococcaceae; Prochlorococcus. Prochlorococcus marinus str. MIT 9202                                 | 5.00E-178 | 98.58            |
| 2292 | Bacteria; Proteobacteria; Deltaproteobacteria; Desulfuromonadales; Pelobacteraceae; Pelobacter. Pelobacter carbinolicus DSM 2380                  | 1.00E-141 | 88.57            |
| 2293 | Bacteria; Bacteroidetes; Flavobacteria; Flavobacteriales; Blattabacteriaceae; Blattabacterium. Blattabacterium sp. (Blattella germanica) str. Bge | 2.00E-134 | 88.1             |
| 2296 | Bacteria; Proteobacteria; Deltaproteobacteria; Desulfuromonadales; Geobacteraceae; Geobacter. Geobacter sp. FRC-32                                | 3.00E-87  | 87.46            |
| 2300 | Bacteria; Proteobacteria; Deltaproteobacteria; Desulfuromonadales; Pelobacteraceae; Pelobacter. Pelobacter carbinolicus DSM 2380                  | 4.00E-89  | 87.43            |
| 2301 | Bacteria; Proteobacteria; Alphaproteobacteria; Rhizobiales; Phyllobacteriaceae; Mesorhizobium. Mesorhizobium loti MAFF303099                      | 5.00E-172 | 92.21            |
| 2303 | Bacteria; Proteobacteria; Alphaproteobacteria; Rickettsiales; SAR11 cluster; Candidatus Pelagibacter. Candidatus Pelagibacter ubique HTCC1002     | 0         | 92.01            |
| 2306 | Bacteria; Proteobacteria; Gammaproteobacteria; Chromatiales; Halothiobacillaceae; Halothiobacillus. Halothiobacillus neapolitanus c2              | 3.00E-96  | 88.32            |
| 2308 | Bacteria; Proteobacteria; Gammaproteobacteria; Chromatiales; Ectothiorhodospiraceae; Alkalilimnicola. Alkalilimnicola ehrlichii MLHE-1            | 7.00E-131 | 88.72            |
| 2310 | Bacteria; Proteobacteria; Gammaproteobacteria; Chromatiales; Ectothiorhodospiraceae; Alkalilimnicola. Alkalilimnicola ehrlichii MLHE-1            | 9.00E-118 | 87.47            |
| 2312 | Bacteria; Proteobacteria; Gammaproteobacteria. gamma proteobacterium NOR51-B                                                                      | 6.00E-79  | 86.29            |
| 2321 | Bacteria; Proteobacteria; Alphaproteobacteria; Rickettsiales; SAR11 cluster; Candidatus Pelagibacter. Candidatus Pelagibacter sp. HTCC7211        | 0         | 94.06            |
| 2326 | Bacteria; Bacteroidetes; Flavobacteria; Flavobacteriales; Flavobacteriaceae; Polaribacter. Polaribacter sp. MED152                                | 0         | 95.22            |
| 2335 | Bacteria; Bacteroidetes; Cytophagia; Cytophagales; Cytophagaceae; Cytophaga. Cytophaga hutchinsonii ATCC 33406                                    | 2.00E-134 | 92.59            |
| 2337 | Bacteria; Cyanobacteria; Prochlorales; Prochlorococcaceae; Prochlorococcus. Prochlorococcus marinus str. MIT 9202                                 | 0         | 98.87            |
| 2339 | Bacteria; Proteobacteria; Alphaproteobacteria; Rickettsiales; SAR11 cluster; Candidatus Pelagibacter. Candidatus Pelagibacter ubique HTCC1062     | 4.00E-160 | 90.25            |
| 2343 | Bacteria; Cyanobacteria; Prochlorales; Prochlorococcaceae; Prochlorococcus. Prochlorococcus marinus subsp. marinus str. CCMP1375                  | 0         | 99.35            |
| 2346 | Bacteria; Proteobacteria; Deltaproteobacteria; Desulfuromonadales; Geobacteraceae; Geobacter. Geobacter sp. M21                                   | 2.00E-100 | 88.73            |
| 2347 | Bacteria; Proteobacteria; Gammaproteobacteria; Alteromonadales; Shewanellaceae; Shewanella. Shewanella sp. ANA-3                                  | 4.00E-74  | 85.43            |
| 2348 | Bacteria; Proteobacteria; Gammaproteobacteria; Legionellales; Coxiellaceae; Coxiella. Coxiella burnetii CbuK_Q154                                 | 1.00E-150 | 90.61            |
| 2355 | Bacteria; Cyanobacteria; Prochlorales; Prochlorococcaceae; Prochlorococcus. Prochlorococcus marinus str. MIT 9202                                 | 0         | 99.71            |
| 2358 | Bacteria; Proteobacteria; Gammaproteobacteria; Alteromonadales; Shewanellaceae; Shewanella. Shewanella woodyi ATCC 51908                          | 3.00E-139 | 88.5             |
| 2359 | Bacteria; Actinobacteria; Actinobacteridae; Actinomycetales; Corynebacterineae; Nocardiaceae; Rhodococcus. Rhodococcus erythropolis PR4           | 1.00E-100 | 89.43            |
| 2360 | Bacteria; Proteobacteria; Alphaproteobacteria; Rickettsiales; SAR11 cluster; Candidatus Pelagibacter. Candidatus Pelagibacter ubique HTCC1002     | 2.00E-165 | 90.55            |
| 2361 | Bacteria; Cyanobacteria; Prochlorales; Prochlorococcaceae; Prochlorococcus. Prochlorococcus marinus str. MIT 9202                                 | 1.00E-123 | 92.26            |
| 2362 | Bacteria; Cyanobacteria; Prochlorales; Prochlorococcaceae; Prochlorococcus. Prochlorococcus marinus subsp. marinus str. CCMP1375                  | 1.00E-85  | 99.42            |
| 2367 | Bacteria; Proteobacteria; Alphaproteobacteria; Rhizobiales; Aurantimonadaceae; Aurantimonas. Aurantimonas manganoxydans SI85-9A1                  | 2.00E-137 | 93.39            |
| 2368 | Bacteria; Cyanobacteria; Prochlorales; Prochlorococcaceae; Prochlorococcus. Prochlorococcus marinus str. MIT 9202                                 | 7.00E-93  | 100              |
| 2372 | Bacteria; Cyanobacteria; Prochlorales; Prochlorococcaceae; Prochlorococcus. Prochlorococcus marinus str. MIT 9202                                 | 0         | 100              |
| 2377 | Bacteria; Proteobacteria; Alphaproteobacteria; Rickettsiales; SAR11 cluster; Candidatus Pelagibacter. Candidatus Pelagibacter sp. HTCC7211        | 1.00E-178 | 92.84            |
| 2378 | Bacteria; Proteobacteria; Deltaproteobacteria; Desulfobacteriales; Desulfomicrobiaceae; Desulfomicrobium. Desulfomicrobium baculatum DSM 4028     | 3.00E-81  | 86.57            |
| 2379 | Bacteria; Proteobacteria; Alphaproteobacteria; Rickettsiales; SAR11 cluster; Candidatus Pelagibacter. Candidatus Pelagibacter ubique HTCC1002     | 3.00E-139 | 88.48            |
| 2381 | Bacteria; Proteobacteria; Gammaproteobacteria. gamma proteobacterium NOR51-B                                                                      | 1.00E-83  | 86.57            |
| 2382 | Bacteria; Proteobacteria; Gammaproteobacteria; Legionellales; Legionellaceae; Legionella. Legionella drancourtii LLAP12                           | 3.00E-65  | 84.12            |
| 2383 | Bacteria; Proteobacteria; Deltaproteobacteria; Desulfobacteriales; Desulfobacteraceae; Desulfatibacillum. Desulfatibacillum alkenivorans AK-01    | 2.00E-146 | 89.21            |
| 2385 | Bacteria; Proteobacteria; Gammaproteobacteria; Chromatiales; Halothiobacillaceae; Halothiobacillus. Halothiobacillus neapolitanus c2              | 2.00E-91  | 87.75            |
| 2386 | Bacteria; Verrucomicrobia; Opitutae; Puniceococcales; Puniceococcaceae; Coraliomargarita. Coraliomargarita akajimensis DSM 45221                  | 6.00E-78  | 88.24            |

| OTU  | Phylogeny of best BLAST hit (refseq_genomic)                                                                                                                       | e value   | percent identity |
|------|--------------------------------------------------------------------------------------------------------------------------------------------------------------------|-----------|------------------|
| 2389 | Bacteria; Proteobacteria; Deltaproteobacteria; Desulfuromonadales; Pelobacteraceae; Pelobacter. Pelobacter carbinolicus DSM 2380                                   | 6.00E-94  | 88.24            |
| 2392 | Bacteria; Cyanobacteria; Prochlorales; Prochlorococcaceae; Prochlorococcus. Prochlorococcus marinus str. MIT 9303                                                  | 0         | 98.24            |
| 2396 | Bacteria; Cyanobacteria; Prochlorales; Prochlorococcaceae; Prochlorococcus. Prochlorococcus marinus str. MIT 9202                                                  | 0         | 100              |
| 2397 | Bacteria; Proteobacteria; Gammaproteobacteria; Pseudomonadales; Pseudomonadaceae; Pseudomonas; Pseudomonas coronafaciens. Pseudomonas syringae pv. oryzae str. 1_6 | 8.00E-103 | 85.27            |
| 2405 | Bacteria; Proteobacteria; Deltaproteobacteria; Desulfuromonadales; Geobacteraceae; Geobacter. Geobacter sp. M21                                                    | 8.00E-140 | 88.75            |
| 2410 | Bacteria; Bacteroidetes; Cytophagia; Cytophagales; Flammeovirgaceae; Marivirga. Marivirga tractuosa DSM 4126                                                       | 7.00E-137 | 93.45            |
| 2411 | Bacteria; Proteobacteria; Alphaproteobacteria; Rickettsiales; SAR11 cluster; Candidatus Pelagibacter. Candidatus Pelagibacter ubique HTCC1002                      | 0         | 94.79            |
| 2414 | Bacteria; Planctomycetes; Planctomycetacia; Planctomycetales; Planctomycetaceae; Blastopirellula. Blastopirellula marina DSM 3645                                  | 2.00E-171 | 92.09            |
| 2415 | Bacteria; Proteobacteria; Betaproteobacteria; Burkholderiales; Oxalobacteraceae; Oxalobacter. Oxalobacter formigenes HOxBLS                                        | 2.00E-85  | 87.61            |
| 2416 | Bacteria; Proteobacteria; Gammaproteobacteria; Legionellales; Coxiellaceae; Coxiella. Coxiella burnetii CbuK_Q154                                                  | 2.00E-116 | 90.65            |
| 2417 | Bacteria; Proteobacteria; Zetaproteobacteria; Mariprofundales; Mariprofundaceae; Mariprofundus. Mariprofundus ferrooxydans PV-1                                    | 2.00E-140 | 93.41            |
| 2419 | Bacteria; Proteobacteria; Alphaproteobacteria; Rickettsiales; SAR11 cluster; Candidatus Pelagibacter. Candidatus Pelagibacter ubique HTCC1002                      | 1.00E-144 | 94.44            |
| 2428 | Bacteria; Proteobacteria; Deltaproteobacteria; Desulfobacteriales; Desulfobacteraceae; Desulfococcus. Desulfococcus oleovorans Hxd3                                | 4.00E-120 | 87.69            |
| 2429 | Bacteria; Proteobacteria; Alphaproteobacteria; Rhodobacterales; Rhodobacteraceae; Thalassobium. Thalassobium sp. R2A62                                             | 0         | 96.49            |
| 2432 | Bacteria; Proteobacteria; Alphaproteobacteria; Rickettsiales; SAR11 cluster; Candidatus Pelagibacter. Candidatus Pelagibacter ubique HTCC1062                      | 2.00E-149 | 93.21            |
| 2433 | Bacteria; Proteobacteria; Alphaproteobacteria; SAR116 cluster; Candidatus Puniceispirillum. Candidatus Puniceispirillum marinum IMCC1322                           | 3.00E-139 | 93.43            |
| 2434 | Bacteria; Deinococcus-Thermus; Deinococci; Deinococcales; Trueperaceae; Truepera. Truepera radiovictrix DSM 17093                                                  | 1.00E-98  | 85.87            |
| 2435 | Bacteria; Proteobacteria; Alphaproteobacteria; Rickettsiales; SAR11 cluster; Candidatus Pelagibacter. Candidatus Pelagibacter ubique HTCC1002                      | 2.00E-155 | 90.17            |
| 2437 | Bacteria; Proteobacteria; Deltaproteobacteria; Desulfuromonadales; Geobacteraceae; Geobacter. Geobacter sp. FRC-32                                                 | 3.00E-95  | 88.83            |
| 2440 | Bacteria; Proteobacteria; Gammaproteobacteria; Oceanospirillales; Alcanivoracaceae; Alcanivorax. Alcanivorax borkumensis SK2                                       | 3.00E-176 | 91.55            |
| 2444 | Bacteria; Cyanobacteria; Prochlorales; Prochlorococcaceae; Prochlorococcus. Prochlorococcus marinus str. NATL2A                                                    | 0         | 99.38            |
| 2446 | Bacteria; Proteobacteria; Gammaproteobacteria; Alteromonadales; Shewanellaceae; Shewanella. Shewanella piezotolerans WP3                                           | 4.00E-160 | 90.12            |
| 2453 | Bacteria; Proteobacteria; Alphaproteobacteria; Rhodobacterales; Rhodobacteraceae. Rhodobacteraceae bacterium KLH11                                                 | 4.00E-163 | 98.12            |
| 2455 | Bacteria; Firmicutes; Bacillales; Paenibacillaceae; Paenibacillus. Paenibacillus sp. Y412MC10                                                                      | 2.00E-85  | 87.54            |
| 2460 | Bacteria; Proteobacteria; Gammaproteobacteria; Vibrionales; Vibrionaceae; Vibrio. Vibrio parahaemolyticus 16                                                       | 0         | 95.62            |
| 2461 | Bacteria; Proteobacteria; Alphaproteobacteria; Rickettsiales; SAR11 cluster; Candidatus Pelagibacter. Candidatus Pelagibacter ubique HTCC1062                      | 0         | 92.61            |
| 2471 | Bacteria; Proteobacteria; Gammaproteobacteria; Pseudomonadales; Pseudomonadaceae; Pseudomonas. Pseudomonas stutzeri A1501                                          | 3.00E-93  | 87.71            |
| 2474 | Bacteria; Bacteroidetes; Flavobacteria; Flavobacteriales; Flavobacteriaceae; Cellulophaga. Cellulophaga algicola DSM 14237                                         | 3.00E-136 | 88.08            |
| 2475 | Bacteria; Proteobacteria; Gammaproteobacteria; Alteromonadales; Shewanellaceae; Shewanella. Shewanella baltica OS223                                               | 8.00E-143 | 88.96            |
| 2476 | Bacteria; Bacteroidetes; Flavobacteria; Flavobacteriales; Flavobacteriaceae; Kordia. Kordia algicida OT-1                                                          | 7.00E-174 | 92.41            |
| 2482 | Bacteria; Proteobacteria; Deltaproteobacteria; Desulfuromonadales; Geobacteraceae; Geobacter. Geobacter sp. M21                                                    | 0         | 92.75            |
| 2483 | Bacteria; Proteobacteria; Deltaproteobacteria; Desulfovibrionales; Desulfovibrionaceae; Desulfovibrio. Desulfovibrio salexigens DSM 2638                           | 3.00E-68  | 85.19            |
| 2484 | Bacteria; Proteobacteria; Gammaproteobacteria; Oceanospirillales; Alcanivoracaceae; Alcanivorax. Alcanivorax borkumensis SK2                                       | 5.00E-73  | 85.8             |
| 2487 | Bacteria; Proteobacteria; Deltaproteobacteria; Desulfovibrionales; Desulfomicrobiaceae; Desulfomicrobium. Desulfomicrobium baculatum DSM 4028                      | 5.00E-76  | 86.4             |
| 2489 | Bacteria; Bacteroidetes; Flavobacteria; Flavobacteriales; Flavobacteriaceae; Gramella. Gramella forsetii KT0803                                                    | 7.00E-131 | 88.26            |
| 2490 | Bacteria; Bacteroidetes; Flavobacteria; Flavobacteriales; Flavobacteriaceae; Robiginitalea. Robiginitalea biformata HTCC2501                                       | 0         | 94.53            |
| 2494 | Bacteria; Actinobacteria; Actinobacteridae; Actinomycetales; Micrococchineae; Intrasporangiaceae; Janibacter. Janibacter sp. HTCC2649                              | 7.00E-90  | 88.1             |
| 2496 | Bacteria; Bacteroidetes; Flavobacteria; Flavobacteriales; Flavobacteriaceae; Cellulophaga. Cellulophaga algicola DSM 14237                                         | 6.00E-162 | 91.32            |
| 2498 | Bacteria; Proteobacteria; Deltaproteobacteria; Desulfuromonadales; Geobacteraceae; Geobacter. Geobacter sp. FRC-32                                                 | 4.00E-89  | 87.43            |
| 2499 | Bacteria; Bacteroidetes; Flavobacteria; Flavobacteriales; Flavobacteriaceae; Polaribacter. Polaribacter irgensii 23-P                                              | 2.00E-125 | 87.83            |
| 2500 | Bacteria; Cyanobacteria; Prochlorales; Prochlorococcaceae; Prochlorococcus. Prochlorococcus marinus str. MIT 9202                                                  | 1.00E-178 | 100              |

| OTU  | Phylogeny of best BLAST hit (refseq_genomic)                                                                                                                            | e value   | percent identity |
|------|-------------------------------------------------------------------------------------------------------------------------------------------------------------------------|-----------|------------------|
| 2505 | Bacteria; Proteobacteria; Alphaproteobacteria; Rhodobacterales; Rhodobacteraceae; Rhodobacter. Rhodobacter sphaeroides KD131                                            | 1.00E-119 | 92.02            |
| 2508 | Bacteria; Proteobacteria; Deltaproteobacteria; Desulfuromonadales; Geobacteraceae; Geobacter. Geobacter bemidjensis Bem                                                 | 1.00E-95  | 85.68            |
| 2513 | Bacteria; Proteobacteria; Gammaproteobacteria; Alteromonadales; Shewanellaceae; Shewanella. Shewanella sp. ANA-3                                                        | 5.00E-79  | 86               |
| 2514 | Bacteria; Proteobacteria; Alphaproteobacteria; Rickettsiales; SAR11 cluster; Candidatus Pelagibacter. Candidatus Pelagibacter sp. HTCC7211                              | 1.00E-160 | 91.21            |
| 2516 | Bacteria; Proteobacteria; Gammaproteobacteria; Alteromonadales; Shewanellaceae; Shewanella. Shewanella baltica OS223                                                    | 1.00E-110 | 86.82            |
| 2517 | Bacteria; Proteobacteria; Deltaproteobacteria; Desulfuromonadales; Geobacteraceae; Geobacter. Geobacter sp. FRC-32                                                      | 1.00E-60  | 87.45            |
| 2518 | Eukaryota; Alveolata; Apicomplexa; Aconoidasida; Haemosporida; Plasmodium; Plasmodium (Vinckeia). Plasmodium yoelii yoelii str. 17XNL                                   | 0         | 92.71            |
| 2522 | Bacteria; Bacteroidetes; Flavobacteria; Flavobacteriales; Flavobacteriaceae; Cellulophaga. Cellulophaga lytica DSM 7489                                                 | 8.00E-140 | 89.13            |
| 2530 | Bacteria; Bacteroidetes; Flavobacteria; Flavobacteriales; Flavobacteriaceae; Robiginitalea. Robiginitalea biformata HTCC2501                                            | 0         | 94.35            |
| 2540 | Bacteria; Proteobacteria; Deltaproteobacteria; Desulfuromonadales; Geobacteraceae; Geobacter. Geobacter sp. FRC-32                                                      | 2.00E-112 | 90.17            |
| 2541 | Bacteria; Proteobacteria; Deltaproteobacteria; Desulfovibrionales; Desulfovibrionaceae; Desulfovibrio. Desulfovibrio desulfuricans subsp. desulfuricans str. ATCC 27774 | 5.00E-70  | 92.46            |
| 2549 | Bacteria; Cyanobacteria; Prochlorales; Prochlorococcaceae; Prochlorococcus. Prochlorococcus marinus str. MIT 9202                                                       | 0         | 99.38            |
| 2554 | Bacteria; Proteobacteria; Alphaproteobacteria; Rickettsiales; SAR11 cluster; Candidatus Pelagibacter. Candidatus Pelagibacter sp. HTCC7211                              | 0         | 93.93            |
| 2559 | Bacteria; Proteobacteria; Gammaproteobacteria; Legionellales; Coxiellaceae; Coxiella. Coxiella burnetii CbuK_Q154                                                       | 3.00E-114 | 90.08            |
| 2563 | Bacteria; Proteobacteria; Alphaproteobacteria; Rhodobacterales; Rhodobacteraceae; Ruegeria. Ruegeria pomeroyi DSS-3                                                     | 0         | 95.67            |
| 2565 | Bacteria; Proteobacteria; Gammaproteobacteria; Legionellales; Legionellaceae; Legionella. Legionella pneumophila 2300/99 Alcoy                                          | 3.00E-158 | 90.35            |
| 2568 | Bacteria; Proteobacteria; Alphaproteobacteria; Rickettsiales; SAR11 cluster; Candidatus Pelagibacter. Candidatus Pelagibacter ubique HTCC1062                           | 0         | 96.47            |
| 2570 | Bacteria; Cyanobacteria; Prochlorales; Prochlorococcaceae; Prochlorococcus. Prochlorococcus marinus str. MIT 9515                                                       | 0         | 98.54            |
| 2574 | Bacteria; Proteobacteria; Betaproteobacteria; Gallionellales; Gallionellaceae; Gallionella. Gallionella capsiferriformans ES-2                                          | 0         | 92.8             |
| 2575 | Bacteria; Cyanobacteria; Prochlorales; Prochlorococcaceae; Prochlorococcus. Prochlorococcus marinus str. MIT 9202                                                       | 0         | 98.28            |
| 2587 | Bacteria; Proteobacteria; Gammaproteobacteria; Alteromonadales; Psychromonadaceae; Psychromonas. Psychromonas ingrahamii 37                                             | 0         | 93.67            |
| 2588 | Bacteria; Proteobacteria; Gammaproteobacteria; Alteromonadales; Shewanellaceae; Shewanella. Shewanella woodyi ATCC 51908                                                | 2.00E-121 | 91.12            |
| 2592 | Bacteria; Cyanobacteria; Prochlorales; Prochlorococcaceae; Prochlorococcus. Prochlorococcus marinus str. MIT 9202                                                       | 2.00E-146 | 94.02            |
| 2599 | Bacteria; Proteobacteria; Alphaproteobacteria; Rickettsiales; SAR11 cluster; Candidatus Pelagibacter. Candidatus Pelagibacter ubique HTCC1002                           | 2.00E-131 | 89.78            |
| 2604 | Bacteria; Cyanobacteria; Prochlorales; Prochlorococcaceae; Prochlorococcus. Prochlorococcus marinus str. NATL2A                                                         | 0         | 99.7             |
| 2606 | Bacteria; Cyanobacteria; Chroococcales; Synechococcus. Synechococcus sp. WH 7803                                                                                        | 0         | 94.34            |
| 2609 | Bacteria; Proteobacteria; Alphaproteobacteria; Rhodobacterales; Rhodobacteraceae; Roseovarius. Roseovarius sp. 217                                                      | 6.00E-162 | 98.44            |
| 2611 | Bacteria; Bacteroidetes; Flavobacteria; Flavobacteriales; Flavobacteriaceae; Robiginitalea. Robiginitalea biformata HTCC2501                                            | 2.00E-177 | 93.5             |
| 2616 | Bacteria; Proteobacteria; Deltaproteobacteria; Desulfuromonadales; Pelobacteraceae; Pelobacter. Pelobacter propionicus DSM 2379                                         | 2.00E-131 | 87.97            |
| 2617 | Bacteria; Chlamydiae; Chlamydiales; Waddliaceae; Waddlia. Waddlia chondrophila WSU 86-1044                                                                              | 1.00E-113 | 91.67            |
| 2625 | Bacteria; Proteobacteria; Gammaproteobacteria; Pseudomonadales; Pseudomonadaceae; Cellvibrio. Cellvibrio japonicus Ueda107                                              | 3.00E-90  | 87.54            |
| 2629 | Bacteria; Cyanobacteria; Prochlorales; Prochlorococcaceae; Prochlorococcus. Prochlorococcus marinus str. MIT 9202                                                       | 0         | 99.44            |
| 2634 | Bacteria; Chlamydiae; Chlamydiales; Chlamydiaceae; Chlamydomphila. Chlamydomphila abortus S26/3                                                                         | 3.00E-130 | 88.24            |
| 2638 | Bacteria; Proteobacteria; Gammaproteobacteria; Alteromonadales; Shewanellaceae; Shewanella. Shewanella amazonensis SB2B                                                 | 8.00E-137 | 89               |
| 2640 | Bacteria; Proteobacteria; Deltaproteobacteria; Desulfuromonadales; Geobacteraceae; Geobacter. Geobacter sp. M21                                                         | 1.00E-148 | 89.32            |
| 2644 | Bacteria; Proteobacteria; Alphaproteobacteria; Rhizobiales; Phyllobacteriaceae; Mesorhizobium. Mesorhizobium ciceri biovar biserrulae WSM1271                           | 2.00E-165 | 91.49            |
| 2645 | Bacteria; Bacteroidetes; Flavobacteria; Flavobacteriales; Flavobacteriaceae; Gramella. Gramella forsetii KT0803                                                         | 8.00E-143 | 89.93            |
| 2649 | Bacteria; Proteobacteria; Deltaproteobacteria; Syntrophobacterales; Syntrophaceae; Syntrophus. Syntrophus aciditrophicus SB                                             | 8.00E-140 | 89.57            |
| 2650 | Bacteria; Bacteroidetes; Flavobacteria; Flavobacteriales; Flavobacteriaceae; Polaribacter. Polaribacter sp. MED152                                                      | 2.00E-121 | 87.85            |
| 2662 | Bacteria; Proteobacteria; Alphaproteobacteria; Rickettsiales; SAR11 cluster; Candidatus Pelagibacter. Candidatus Pelagibacter sp. HTCC7211                              | 6.00E-131 | 96.84            |
| 2663 | Bacteria; Proteobacteria; Alphaproteobacteria; Rhizobiales; Phyllobacteriaceae; Chelativorans. Chelativorans sp. BNC1                                                   | 3.00E-148 | 90.48            |

| OTU  | Phylogeny of best BLAST hit (refseq_genomic)                                                                                                                  | e value   | percent identity |
|------|---------------------------------------------------------------------------------------------------------------------------------------------------------------|-----------|------------------|
| 2673 | Bacteria; Proteobacteria; Deltaproteobacteria; Desulfuromonadales; Geobacteraceae; Geobacter. Geobacter sp. FRC-32                                            | 1.00E-123 | 91.4             |
| 2676 | Bacteria; Verrucomicrobia; Verrucomicrobiae; Verrucomicrobiales. Verrucomicrobiae bacterium DG1235                                                            | 2.00E-171 | 97.13            |
| 2677 | Bacteria; Cyanobacteria; Prochlorales; Prochlorococcaceae; Prochlorococcus. Prochlorococcus marinus str. NATL2A                                               | 0         | 99.75            |
| 2681 | Bacteria; Proteobacteria; Alphaproteobacteria; Rickettsiales; SAR11 cluster; Candidatus Pelagibacter. Candidatus Pelagibacter sp. HTCC7211                    | 3.00E-176 | 96.59            |
| 2688 | Bacteria; Proteobacteria; Betaproteobacteria; Candidatus Accumulibacter. Candidatus Accumulibacter phosphatis clade IIA str. UW-1                             | 0         | 95.87            |
| 2692 | Bacteria; Proteobacteria; Alphaproteobacteria; Rhizobiales; Phyllobacteriaceae; Mesorhizobium. Mesorhizobium ciceri biovar biserrulae WSM1271                 | 1.00E-144 | 89.65            |
| 2693 | Bacteria; Proteobacteria; Alphaproteobacteria; Rickettsiales; SAR11 cluster; Candidatus Pelagibacter. Candidatus Pelagibacter ubique HTCC1062                 | 0         | 95.24            |
| 2694 | Bacteria; Proteobacteria; Alphaproteobacteria; Rickettsiales; SAR11 cluster; Candidatus Pelagibacter. Candidatus Pelagibacter sp. HTCC7211                    | 1.00E-95  | 88.25            |
| 2695 | Bacteria; Proteobacteria; Alphaproteobacteria; Rickettsiales; SAR11 cluster; Candidatus Pelagibacter. Candidatus Pelagibacter ubique HTCC1062                 | 1.00E-172 | 94.99            |
| 2700 | Bacteria; Proteobacteria; Deltaproteobacteria; Syntrophobacteriales; Syntrophobacteraceae; Syntrophobacter                                                    | 4.00E-165 | 88.79            |
| 2701 | Bacteria; Proteobacteria; Alphaproteobacteria; Rickettsiales; SAR11 cluster; Candidatus Pelagibacter. Candidatus Pelagibacter ubique HTCC1002                 | 1.00E-174 | 97.46            |
| 2710 | Bacteria; Proteobacteria; Alphaproteobacteria; Rickettsiales; SAR11 cluster; Candidatus Pelagibacter. Candidatus Pelagibacter ubique HTCC1002                 | 1.00E-144 | 94.54            |
| 2711 | Bacteria; Proteobacteria; Alphaproteobacteria; Rickettsiales; SAR11 cluster; Candidatus Pelagibacter. Candidatus Pelagibacter sp. HTCC7211                    | 6.00E-168 | 95.08            |
| 2712 | Bacteria; Proteobacteria; Gammaproteobacteria; Vibrionales; Vibrionaceae; Vibrio. Vibrio vulnificus MO6-24/O                                                  | 0         | 98.74            |
| 2716 | Bacteria; Actinobacteria; Actinobacteridae; Actinomycetales; Corynebacterineae; Corynebacteriaceae; Corynebacterium. Corynebacterium kroppenstedtii DSM 44385 | 9.00E-96  | 89.02            |
| 2717 | Bacteria; Proteobacteria; Alphaproteobacteria; Rhizobiales; Phyllobacteriaceae; Mesorhizobium. Mesorhizobium ciceri biovar biserrulae WSM1271                 | 1.00E-157 | 91.56            |
| 2720 | Bacteria; Proteobacteria; Alphaproteobacteria; Rickettsiales; SAR11 cluster; Candidatus Pelagibacter. Candidatus Pelagibacter ubique HTCC1062                 | 0         | 95.87            |
| 2721 | Bacteria; Proteobacteria; Alphaproteobacteria; Rickettsiales; SAR11 cluster; Candidatus Pelagibacter. Candidatus Pelagibacter sp. HTCC7211                    | 9.00E-152 | 97.12            |
| 2733 | Bacteria; Firmicutes; Clostridia; Thermoanaerobacteriales; Thermoanaerobacteraceae; Thermoanaerobacter. Thermoanaerobacter brockii subsp. finii Ako-1         | 3.00E-80  | 86.24            |
| 2736 | Bacteria; Proteobacteria; Deltaproteobacteria; Desulfovibrionales; Desulfovibrionaceae; Desulfovibrio. Desulfovibrio salexigens DSM 2638                      | 9.00E-72  | 85.14            |
| 2738 | Bacteria; Proteobacteria; Alphaproteobacteria; Rickettsiales; SAR11 cluster; Candidatus Pelagibacter. Candidatus Pelagibacter ubique HTCC1002                 | 2.00E-109 | 90.25            |
| 2740 | Bacteria; Proteobacteria; Gammaproteobacteria; Chromatiales; Ectothiorhodospiraceae; Thioalkalivibrio. Thioalkalivibrio sulfidophilus HL-EbGr7                | 1.00E-166 | 91.52            |
| 2742 | Bacteria; Proteobacteria; Alphaproteobacteria; SAR116 cluster; Candidatus Puniceispirillum. Candidatus Puniceispirillum marinum IMCC1322                      | 1.00E-101 | 88.79            |
| 2745 | Bacteria; Cyanobacteria; Prochlorales; Prochlorococcaceae; Prochlorococcus. Prochlorococcus marinus str. MIT 9202                                             | 0         | 99.71            |
| 2746 | Bacteria; Proteobacteria; Gammaproteobacteria. gamma proteobacterium NOR51-B                                                                                  | 2.00E-79  | 86.32            |
| 2747 | Bacteria; Bacteroidetes; Sphingobacteria; Sphingobacteriales; Sphingobacteriaceae; Sphingobacterium. Sphingobacterium spiritivorum ATCC 33861                 | 1.00E-82  | 88.31            |
| 2751 | Bacteria; Proteobacteria; Gammaproteobacteria; Chromatiales; Halothiobacillaceae; Halothiobacillus. Halothiobacillus neapolitanus c2                          | 3.00E-96  | 88.32            |
| 2760 | Bacteria; Proteobacteria; Gammaproteobacteria; Oceanospirillales; Hahellaceae; Hahella. Hahella chejuensis KCTC 2396                                          | 0         | 92.8             |
| 2766 | Bacteria; Proteobacteria; Betaproteobacteria; Burkholderiales; Leptothrix. Leptothrix cholodnii SP-6                                                          | 0         | 94.48            |
| 2767 | Bacteria; Firmicutes; Clostridia; Halanaerobiales; Halanaerobiaceae; Halothermothrix. Halothermothrix orenii H 168                                            | 2.00E-82  | 86.65            |
| 2768 | Bacteria; Proteobacteria; Gammaproteobacteria; Chromatiales; Ectothiorhodospiraceae; Thioalkalivibrio. Thioalkalivibrio sp. K90mix                            | 8.00E-177 | 91.77            |
| 2776 | Bacteria; Actinobacteria; Actinobacteridae; Actinomycetales; Frankineae; Frankiaceae; Frankia. Frankia sp. EAN1pec                                            | 2.00E-168 | 90.7             |
| 2777 | Bacteria; Proteobacteria; Gammaproteobacteria; Chromatiales; Ectothiorhodospiraceae; Thioalkalivibrio. Thioalkalivibrio sp. K90mix                            | 0         | 92.18            |
| 2782 | Bacteria; Proteobacteria; Alphaproteobacteria; Rickettsiales; SAR11 cluster; Candidatus Pelagibacter. Candidatus Pelagibacter ubique HTCC1002                 | 7.00E-128 | 91.95            |
| 2783 | Bacteria; Proteobacteria; Alphaproteobacteria; Rickettsiales; SAR11 cluster; Candidatus Pelagibacter. Candidatus Pelagibacter sp. HTCC7211                    | 1.00E-113 | 89.08            |
| 2784 | Bacteria; Proteobacteria; Deltaproteobacteria; Desulfuromonadales; Pelobacteraceae; Pelobacter. Pelobacter propionicus DSM 2379                               | 4.00E-151 | 89.32            |
| 2785 | Bacteria; Cyanobacteria; Prochlorales; Prochlorococcaceae; Prochlorococcus. Prochlorococcus marinus str. NATL2A                                               | 5.00E-150 | 90.02            |
| 2786 | Bacteria; Cyanobacteria; Prochlorales; Prochlorococcaceae; Prochlorococcus. Prochlorococcus marinus str. MIT 9202                                             | 1.00E-85  | 96.37            |
| 2787 | Bacteria; Verrucomicrobia; Opitutae; Puniceococcales; Puniceococcaceae; Coraliomargarita. Coraliomargarita akajimensis DSM 45221                              | 0         | 95.28            |
| 2789 | Bacteria; Proteobacteria; Alphaproteobacteria; Rickettsiales; SAR11 cluster; Candidatus Pelagibacter. Candidatus Pelagibacter sp. HTCC7211                    | 1.00E-166 | 91.97            |
| 2795 | Bacteria; Proteobacteria; Gammaproteobacteria; Oceanospirillales; Hahellaceae; Hahella. Hahella chejuensis KCTC 2396                                          | 3.00E-176 | 92.56            |

| OTU  | Phylogeny of best BLAST hit (refseq_genomic)                                                                                                   | e value   | percent identity |
|------|------------------------------------------------------------------------------------------------------------------------------------------------|-----------|------------------|
| 2797 | Bacteria; Proteobacteria; Gammaproteobacteria; Pseudomonadales; Pseudomonadaceae; Cellvibrio. Cellvibrio japonicus Ueda107                     | 1.00E-70  | 85.51            |
| 2804 | Bacteria; Cyanobacteria; Prochlorales; Prochlorococcaceae; Prochlorococcus. Prochlorococcus marinus subsp. marinus str. CCMP1375               | 0         | 97.24            |
| 2805 | Bacteria; Proteobacteria; Deltaproteobacteria; Desulfuromonadales; Geobacteraceae; Geobacter. Geobacter sp. FRC-32                             | 1.00E-77  | 86.32            |
| 2806 | Bacteria; Proteobacteria; Deltaproteobacteria; Desulfuromonadales; Pelobacteraceae; Pelobacter. Pelobacter carbinolicus DSM 2380               | 3.00E-121 | 91.4             |
| 2809 | Bacteria; Proteobacteria; Alphaproteobacteria; Rhizobiales; Xanthobacteraceae; Azorhizobium. Azorhizobium caulinodans ORS 571                  | 1.00E-125 | 92.33            |
| 2815 | Bacteria; Proteobacteria; Gammaproteobacteria; Legionellales; Coxiellaceae; Coxiella. Coxiella burnetii CbuK_Q154                              | 6.00E-110 | 89.19            |
| 2816 | Bacteria; Proteobacteria; Gammaproteobacteria; Xanthomonadales; Xanthomonadaceae; Xanthomonas. Xanthomonas campestris pv. campestris str. B100 | 4.00E-89  | 87.46            |
| 2817 | Bacteria; Proteobacteria; Deltaproteobacteria; Desulfuromonadales; Pelobacteraceae; Pelobacter. Pelobacter propionicus DSM 2379                | 6.00E-116 | 86.68            |
| 2820 | Bacteria; Proteobacteria; Gammaproteobacteria; Alteromonadales; Shewanellaceae; Shewanella. Shewanella sp. ANA-3                               | 1.00E-95  | 88               |
| 2823 | Bacteria; Proteobacteria; Gammaproteobacteria; Chromatiales; Halothiobacillaceae; Halothiobacillus. Halothiobacillus neapolitanus c2           | 7.00E-94  | 88.32            |
| 2825 | Bacteria; Proteobacteria; Alphaproteobacteria; Sphingomonadales; Sphingomonadaceae; Sphingomonas. Sphingomonas wittichii RW1                   | 1.00E-135 | 89.62            |
| 2826 | Bacteria; Proteobacteria; Deltaproteobacteria; Desulfobacteriales; Desulfobacteraceae; Desulfococcus. Desulfococcus oleovorans Hxd3            | 2.00E-130 | 91.13            |
| 2827 | Bacteria; Proteobacteria; Gammaproteobacteria; Oceanospirillales; Alcanivoracaceae; Alcanivorax. Alcanivorax borkumensis SK2                   | 1.00E-129 | 88.55            |
| 2828 | Bacteria; Proteobacteria; Deltaproteobacteria; Desulfuromonadales; Geobacteraceae; Geobacter. Geobacter sp. M21                                | 7.00E-131 | 92.26            |
| 2833 | Bacteria; Cyanobacteria; Prochlorales; Prochlorococcaceae; Prochlorococcus. Prochlorococcus marinus str. MIT 9202                              | 8.00E-167 | 98.21            |
| 2834 | Bacteria; Verrucomicrobia; Opitutae; Puniceococcales; Puniceococcaceae; Coraliomargarita. Coraliomargarita akajimensis DSM 45221               | 4.00E-80  | 93.06            |
| 2836 | Bacteria; Proteobacteria; Deltaproteobacteria; Desulfuromonadales; Pelobacteraceae; Pelobacter. Pelobacter carbinolicus DSM 2380               | 2.00E-109 | 89.68            |
| 2841 | Bacteria; Proteobacteria; Deltaproteobacteria; Desulfobacteriales; Desulfomicrobiaceae; Desulfomicrobium. Desulfomicrobium baculatum DSM 4028  | 5.00E-67  | 84.57            |
| 2842 | Bacteria; Proteobacteria; Alphaproteobacteria; Rickettsiales; SAR11 cluster; Candidatus Pelagibacter. Candidatus Pelagibacter ubique HTCC1062  | 1.00E-138 | 94.07            |
| 2843 | Bacteria; Verrucomicrobia; Opitutae; Puniceococcales; Puniceococcaceae; Coraliomargarita. Coraliomargarita akajimensis DSM 45221               | 0         | 95.43            |
| 2849 | Bacteria; Proteobacteria; Alphaproteobacteria; Rickettsiales; SAR11 cluster; Candidatus Pelagibacter. Candidatus Pelagibacter ubique HTCC1002  | 2.00E-122 | 91.35            |
| 2851 | Bacteria; Proteobacteria; Alphaproteobacteria; Rickettsiales; SAR11 cluster; Candidatus Pelagibacter. Candidatus Pelagibacter sp. HTCC7211     | 1.00E-113 | 90.8             |
| 2852 | Bacteria; Proteobacteria; Gammaproteobacteria; Oceanospirillales; Hahellaceae; Hahella. Hahella chejuensis KCTC 2396                           | 0         | 92.92            |
| 2853 | Bacteria; Proteobacteria; Alphaproteobacteria; Rickettsiales; SAR11 cluster; Candidatus Pelagibacter. Candidatus Pelagibacter ubique HTCC1002  | 4.00E-138 | 91.27            |
| 2856 | Bacteria; Cyanobacteria; Prochlorales; Prochlorococcaceae; Prochlorococcus. Prochlorococcus marinus str. MIT 9202                              | 7.00E-180 | 99.4             |
| 2858 | Bacteria; Proteobacteria; Alphaproteobacteria; Rickettsiales; SAR11 cluster; Candidatus Pelagibacter. Candidatus Pelagibacter sp. HTCC7211     | 0         | 92.26            |
| 2861 | Bacteria; Proteobacteria; Gammaproteobacteria; Alteromonadales; Alteromonadaceae; Alteromonas. Alteromonas macleodii str. 'Deep ecotype'       | 0         | 96.69            |
| 2867 | Bacteria; Proteobacteria; Alphaproteobacteria; Rickettsiales; SAR11 cluster; Candidatus Pelagibacter. Candidatus Pelagibacter ubique HTCC1002  | 1.00E-76  | 92.2             |
| 2869 | Bacteria; Cyanobacteria; Prochlorales; Prochlorococcaceae; Prochlorococcus. Prochlorococcus marinus str. NATL2A                                | 0         | 99.71            |
| 2870 | Bacteria; Actinobacteria; Actinobacteridae; Actinomycetales; Corynebacterineae; Nocardiaceae; Rhodococcus. Rhodococcus jostii RHA1             | 2.00E-100 | 89.43            |
| 2871 | Bacteria; Planctomycetes; Planctomycetacia; Planctomycetales; Planctomycetaceae; Blastopirellula. Blastopirellula marina DSM 3645              | 2.00E-122 | 91.17            |
| 2872 | Bacteria; Proteobacteria; Gammaproteobacteria; Chromatiales; Halothiobacillaceae; Halothiobacillus. Halothiobacillus neapolitanus c2           | 1.00E-86  | 87.46            |
| 2876 | Bacteria; Proteobacteria; Gammaproteobacteria; Chromatiales; Ectothiorhodospiraceae; Alkalilimnicola. Alkalilimnicola ehrlichii MLHE-1         | 2.00E-155 | 95.43            |
| 2878 | Bacteria; Cyanobacteria; Chroococcales; Synechococcus. Synechococcus sp. RS9916                                                                | 0         | 98.69            |
| 2880 | Bacteria; Proteobacteria; Alphaproteobacteria; Rhodobacteriales; Rhodobacteraceae; Roseibium. Roseibium sp. TrichSKD4                          | 0         | 97.73            |
| 2882 | Bacteria; Proteobacteria; Alphaproteobacteria; Rickettsiales; SAR11 cluster; Candidatus Pelagibacter. Candidatus Pelagibacter sp. HTCC7211     | 7.00E-109 | 90.16            |
| 2883 | Bacteria; Proteobacteria; Gammaproteobacteria; Alteromonadales; Shewanellaceae; Shewanella. Shewanella baltica OS223                           | 2.00E-137 | 89.73            |
| 2890 | Bacteria; Proteobacteria; Deltaproteobacteria; Desulfuromonadales; Geobacteraceae; Geobacter. Geobacter sp. M21                                | 2.00E-91  | 87.71            |
| 2892 | Bacteria; Proteobacteria; Alphaproteobacteria; Rickettsiales; SAR11 cluster; Candidatus Pelagibacter. Candidatus Pelagibacter ubique HTCC1002  | 2.00E-108 | 90.75            |
| 2894 | Bacteria; Actinobacteria; Actinobacteridae; Actinomycetales; Corynebacterineae; Nocardiaceae; Rhodococcus. Rhodococcus jostii RHA1             | 7.00E-106 | 89.63            |
| 2904 | Bacteria; Planctomycetes; Planctomycetacia; Planctomycetales; Planctomycetaceae; Blastopirellula. Blastopirellula marina DSM 3645              | 1.00E-116 | 90.93            |
| 2905 | Bacteria; Proteobacteria; Epsilonproteobacteria; Campylobacteriales; Helicobacteraceae; Wolinella. Wolinella succinogenes DSM 1740             | 6.00E-38  | 85.25            |

| OTU  | Phylogeny of best BLAST hit (refseq_genomic)                                                                                                  | e value   | percent identity |
|------|-----------------------------------------------------------------------------------------------------------------------------------------------|-----------|------------------|
| 2910 | Bacteria; Proteobacteria; Alphaproteobacteria; Rhizobiales; Bradyrhizobiaceae; Rhodopseudomonas. Rhodopseudomonas palustris BisA53            | 9.00E-65  | 85.71            |
| 2911 | Bacteria; Proteobacteria; Gammaproteobacteria; Alteromonadales; Shewanellaceae; Shewanella. Shewanella baltica OS223                          | 1.00E-83  | 86.57            |
| 2913 | Bacteria; Cyanobacteria; Chroococcales; Cyanothece. Cyanothece sp. ATCC 51142                                                                 | 1.00E-165 | 96.87            |
| 2915 | Bacteria; Cyanobacteria; Prochlorales; Prochlorococcaceae; Prochlorococcus. Prochlorococcus marinus str. MIT 9202                             | 0         | 100              |
| 2916 | Bacteria; Proteobacteria; Deltaproteobacteria; Desulfuromonadales; Geobacteraceae; Geobacter. Geobacter sp. M21                               | 7.00E-94  | 88.29            |
| 2918 | Bacteria; Proteobacteria; Deltaproteobacteria; Desulfovibrionales; Desulfovibrionaceae; Desulfovibrio. Desulfovibrio aespoensis Aspo-2        | 2.00E-91  | 88.03            |
| 2922 | Bacteria; Proteobacteria; Gammaproteobacteria. gamma proteobacterium NOR51-B                                                                  | 3.00E-81  | 86.57            |
| 2924 | Bacteria; Proteobacteria; Alphaproteobacteria; Rhizobiales; Brucellaceae; Brucella. Brucella abortus bv. 5 str. B3196                         | 2.00E-134 | 89.63            |
| 2929 | Bacteria; Proteobacteria; Alphaproteobacteria; Sphingomonadales; Sphingomonadaceae; Sphingopyxis. Sphingopyxis alaskensis RB2256              | 2.00E-149 | 90.22            |
| 2932 | Bacteria; Proteobacteria; Alphaproteobacteria; Rickettsiales; SAR11 cluster. alpha proteobacterium HIMB114                                    | 0         | 96.04            |
| 2933 | Bacteria; Cyanobacteria; Prochlorales; Prochlorococcaceae; Prochlorococcus. Prochlorococcus marinus str. NATL2A                               | 6.00E-143 | 96.65            |
| 2934 | Bacteria; Proteobacteria; Gammaproteobacteria; Xanthomonadales; Xanthomonadaceae; Xanthomonas. Xanthomonas oryzae pv. oryzae PXO99A           | 3.00E-132 | 93.29            |
| 2940 | Bacteria; Firmicutes; Bacillales; Listeriaceae; Listeria. Listeria monocytogenes 08-5923                                                      | 1.00E-39  | 85.78            |
| 2946 | Bacteria; Proteobacteria; Deltaproteobacteria; Desulfuromonadales; Geobacteraceae; Geobacter. Geobacter sulfurreducens PCA                    | 2.00E-158 | 90.85            |
| 2948 | Bacteria; Proteobacteria; Gammaproteobacteria. gamma proteobacterium NOR51-B                                                                  | 9.00E-75  | 86.32            |
| 2949 | Bacteria; Proteobacteria; Alphaproteobacteria; Rhizobiales; Phyllobacteriaceae; Mesorhizobium. Mesorhizobium ciceri biovar biserrulae WSM1271 | 7.00E-165 | 91.77            |
| 2953 | Bacteria; Proteobacteria; Zetaproteobacteria; Mariprofundales; Mariprofundaceae; Mariprofundus. Mariprofundus ferrooxydans PV-1               | 6.00E-82  | 87.18            |
| 2954 | Bacteria; Cyanobacteria; Prochlorales; Prochlorococcaceae; Prochlorococcus. Prochlorococcus marinus subsp. marinus str. CCMP1375              | 0         | 97.96            |
| 2957 | Bacteria; Firmicutes; Bacillales; Bacillaceae; Bacillus. Bacillus licheniformis ATCC 14580                                                    | 1.00E-132 | 88.2             |
| 2960 | Bacteria; Proteobacteria; Gammaproteobacteria; Alteromonadales; Pseudoalteromonadaceae; Pseudoalteromonas. Pseudoalteromonas sp. SM9913       | 0         | 94.57            |
| 2961 | Bacteria; Proteobacteria; Alphaproteobacteria; Rickettsiales; SAR11 cluster; Candidatus Pelagibacter. Candidatus Pelagibacter ubique HTCC1002 | 3.00E-164 | 91.54            |
| 2964 | Bacteria; Proteobacteria; Alphaproteobacteria; Rickettsiales; SAR11 cluster; Candidatus Pelagibacter. Candidatus Pelagibacter sp. HTCC7211    | 0         | 92.13            |
| 2973 | Bacteria; Proteobacteria; Alphaproteobacteria; Rhodospirillales; Rhodospirillaceae; Rhodospirillum. Rhodospirillum rubrum ATCC 11170          | 1.00E-101 | 88.64            |
| 2974 | Bacteria; Proteobacteria; Alphaproteobacteria; Rickettsiales; SAR11 cluster; Candidatus Pelagibacter. Candidatus Pelagibacter sp. HTCC7211    | 0         | 97.63            |
| 2981 | Bacteria; Actinobacteria; Actinobacteridae; Actinomycetales; Corynebacterineae; Nocardiaceae; Rhodococcus. Rhodococcus jostii RHA1            | 7.00E-109 | 89.66            |
| 2983 | Bacteria; Proteobacteria; Alphaproteobacteria; Rickettsiales; SAR11 cluster; Candidatus Pelagibacter. Candidatus Pelagibacter sp. HTCC7211    | 5.00E-172 | 92.41            |
| 2985 | Bacteria; Firmicutes; Clostridia; Clostridiales; Clostridiaceae; Clostridium. Clostridium sp. SS2/1                                           | 2.00E-45  | 86.24            |
| 2986 | Bacteria; Proteobacteria; Gammaproteobacteria; OMG group; SAR92 clade. gamma proteobacterium HTCC2207                                         | 2.00E-161 | 96.07            |
| 2989 | Bacteria; Proteobacteria; Alphaproteobacteria; Rickettsiales; SAR11 cluster; Candidatus Pelagibacter. Candidatus Pelagibacter sp. HTCC7211    | 0         | 98.6             |
| 2992 | Bacteria; Spirochaetes; Spirochaetales; Brachyspiraceae; Brachyspira. Brachyspira pilosicoli 95/1000                                          | 1.00E-33  | 85.15            |
| 2994 | Bacteria; Cyanobacteria; Prochlorales; Prochlorococcaceae; Prochlorococcus. Prochlorococcus marinus str. NATL2A                               | 0         | 98.54            |
| 2997 | Bacteria; Cyanobacteria; Prochlorales; Prochlorococcaceae; Prochlorococcus. Prochlorococcus marinus str. MIT 9202                             | 0         | 99.71            |
| 3002 | Bacteria; Cyanobacteria; Prochlorales; Prochlorococcaceae; Prochlorococcus. Prochlorococcus marinus str. MIT 9202                             | 2.00E-156 | 89.88            |
